# Supplementary material for: Hunger- and thirst-sensing neurons modulate a neuroendocrine network to coordinate sugar and water ingestion
Source: eLife. 2023 Sep 21;12:RP88143. doi: 10.7554/eLife.88143 (PMC10513480; doi:10.7554/eLife.88143)
Supplement: Figure 1—source data 1. [file elife-88143-fig1-data1.xlsx]

## Sheet: NT screen
Ingestion time in (s)
nSyb no Gal4	nSyb RNAi 31983	Trh no Gal4	Trh RNAi 2756	Cha no Gal4	Cha RNAi 25856	TBH no Gal4	TBH RNAi 27667	HDC no Gal4	HDC RNAi 26000	VMAT no Gal4	VMAT RNAi 31257	GAD1 no Gal4	GAD1 RNAi 28079	DDC no Gal4	DCC RNAi 27030	DVGlut no Gal4	DVGlut RNAi 27538	sNPF no Gal4	sNPF RNAi	VGAT no Gal4	VGAT RNAi 41958	Tdc2 no Gal4	Tdc2 RNAi	ILP-1 no Gal4	ILP-1 RNAi	ILP2 no Gal4	ILP2 RNAi	ILP3#31492 no Gal4	ILP3#31492 RNAi	ILP4 no Gal4	ILP4 RNAi	ILP5 no Gal4	ILP5 RNAi	ILP6 no Gal4	ILP6 RNAi	ILP7 no Gal4	ILP7 RNAi
3.7	5.1	3.2	4.6	5.2	4.3	8.6	9.1	4.4	6.4	4.4	3.6	3.5	4.5	3.1	0	4.2	1.6	3	3.4	5.3	3.4	4.8	4	4.1	3.4	4.1	9	6.9	18	8	0	4.8	3.6	0	6.1	0	0
3.4	9.1	4.8	7.7	3.3	4.6	5.3	5.5	5.4	0	3.3	3	3.7	5.1	0	0	4.4	2.9	2	5.2	3.8	0	2.2	3.2	3.6	5.9	3.6	4	5.3	14	0	2.7	4.5	4.7	5.1	3	0	0
4.6	6.4	5.1	4.5	3.9	3.9	6.8	4.8	4	0	5	4.2	4.1	5.6	0	0	7.3	4.5	7	0	4.2	4.6	2.5	4.4	2.9	3.9	2.9	5.6	1.7	13.6	7.3	4.3	4.3	4.3	8.1	7	0	4.7
6.9	9.3	4.1	3.5	2.8	3.7	7.1	4.6	3.6	5.4	4.9	7.4	3.5	9.4	4.4	0	5.5	7.5	3.6	8.4	4.3	2.4	3	4	3.9	0	3.9	0	5.3	5.6	3.8	4.1	4.7	3.3	8.3	6.1	3.5	2.5
6.4	6.5	0	5.3	0	0	5.4	7.9	7.2	3.5	4.3	3.7	3.8	9.1	0	5.6	2.9	2.8	0	0	4.5	6	6	5.5	4.2	4.2	4.2	4.2	5.8	20.4	2.4	4.4	3.1	2.8	4.4	5.4	5.5	0
5	9.2	3.7	4.1	3.8	6.5	5.1	7.5	3	4	0	2.1	3.4	5.6	1.7	0	4.5	0	5.5	5.5	2.9	8.2	4	3.5	2.7	3.6	2.7	5.3	5.8	5.4	4.3	4	2.9	4.1	5.9	8.5	0	4.3
4.3	6.8	4.3	3.7	5	5.6	6.2	12.7	6.6	8.7	3.1	5.2	9.5	4.8	0	0	3.3	0	2.5	0	5.3	3.7	6	4.3	5.2	5	5.2	7.8	4.5	15.6	7	3.1	6.4	3.9	5.8	9.3	4.3	9
4	9.8	0	6.7	4	4.7	5.5	5.5	4.8	0	4	3.5	6.8	3.6	3	4.2	4	3.5	5.7	0	2.6	3.8	5.3	5.3	0	0	0	0	5.7	9.4	4.1	4	4.7	4.5	4.2	7.3	0	5.2
4.5	12.7	5.7	13.3	5	3.1	4.8	9.1	0	3.2	3	3.1	4.3	5.8		3.6	4.4	4.7	3.8	0	6.5	3.7	3.2	7.3	4.7	9.1	4.7	9.1	5.8	10.9	4	1.5	3.4	4.3	6	0	4.5	0
4	5.3	3.9	8.5	5.9	4.6	8.6		6.6	5.7	7.2	1.6	5.2			0	4.7	6.6	2.3	0	0	7.3	3.7	0	3.8	4.3	4.5	4.3	5	3.4	3.6	5.3	2.5	6.1	0	4.5	0	0
0	11.7	5.6	4.6		3.8				4.5		0				0	3.7	0	2.7		3.5		6.9	5.3	3.4	5.5	2.5	5.5	4.4	13.8	2.9	4.3	4.3	4.9	2.9	9.8	3.7	0
2.3	8.6	2.9	5.1		0				4.5		0				0	4.3	7.8	1.6		4.8			3.5	2.6	4.5	4.2	4.5	6.1	21.7	2.8	0	2.7	3.8	4.3	0	3.9	0
5.8	6.5	3.3	3.3		5.6						3.7				0	3.9	3.5	5.7		5.8			3.8	0	5.3	4.9	0	6.1	0	3.7	0	2.6	3.2	3.9	6.2	2.7	0
3.3	6	3.6	2.7																					6.4	4	0	5.1	7.4	13.2	3.3	0	1.1	0	3.6	4.6	2.7	0
3.6	2.6	4.5	4																					6.5	3.6	3	0	5.2	6.5	3.3	0	4.9	2.8	6.7	5.5	0	3.3
2.2	4.7	6	9.7																					6.7	1	2.6	8	9	7.1	4.4	2.5	0	2.1	4.6	6	6.5	4.2
3.8	0	4.5	9.1																					3.5	4.9	3.4	4.6	5.6	4.4	3.1	2.9	2.4	5.9	4.7	3.8	2.7	4.3
5.8	11	3.2	4																					3.6	0	2.9	5	8.2	17.8	3.5	2.6	3.5	2.4	3.4	4.1	3.9	0
2.8	0	4.8	4.3																					4	4.5	4.7	3.5	3.4	20.1	3.9	0	3.5	3.6	7.6	6.1	3.9	3.4
3.1	6.6	3.9	2.8																					4.2	0	4.4	1.4	7.7	4.3	2.9	2.7	1.9	5.5	3.8	5.6	3.9	0
5.1	8.4	3.8	3.8																					2.5	3.8	4	3.1	6.8	8.9	4.9	2	2.9	1.9	4	6.5	7.4	4.7
3.5	1.5	6.3	0																					2.2	3.6	3.6	3.7	2.5	9.9	4.3	2.4	4.3	2.7	3.3	4.5	6	4.4
5.9	6.7	3	3.8																					0	4.2	3.3	4.9	2.7	11.2	3.3	2.3	3.7	3.5	2.5	5	3.4	0
3.7	3.1	4.2	3.4																					0	0	4.7	3.4	2.8	9.8	5.7	3.8	2.8	7.2	4.4	5.1	0	0
4.4	0	5	4.7																					3.1	0	4.2	6.3	3.4	11.1	4.4	4.6	5.3	5.6	4.4	4.1	5	4
7.5	9.2	3.3	5.9																					3.8	0	2.5	7.4	2.5	12.3	4.7	3.3	7.6	8.1	4.1	5.9	4.6	0
5.1	8.6	4.8	1.1																					0	0	4.5	3.4	5.8	8.3	2.4	0	3.8	3.2	9.5	4.5	3.1	2.7
6.6	8.1	5.5	4.4																					2	0	2.3	2.6	4.2	13.5	3.3	3.8	3.8	4.5	4.1	3.2	2.8	2.9
8.7	2.9	0	3.5																					4.6	0	0	10.1	2.8	2.9	5.3	0	2.7	3.8	4.7	8.2	5.6	0
4.6	7.7	5.2	4.5																					3.4	0	6.4	6	3.5	19.1	3.6	0	2.8	10.8		4.4	2.1	0
0	10.1	2.8	4.1																						4.2		0	4.4	15.4	3.6	6.8	4	6		3.1	0	4.1
5.5	10.5	3.1	3.8																						3.5		8.4	4.5	3.8	3.4	3.5	4	7.2		5.5	4.3	4.1
7.2	5.8	3.7	5.6																						0		6.2	6.2	2.9	3.1	4.3	4.9	3.6		0	4.2	0
5.2	7.3	4	4.6																						0				25.5	3.1	0	2.7	3		10		0
3.6	1.2	4.7	4.7																						3.6				2.7		7.5	6	4.4		1.7		2.8
7.9	12.4	3.9	3.8																												3.5	4.2			3.1		0
7.5	9.5	3.4	0																												8.1				0
5.6	7.2	2.8	0																																2.7
6.7	3.2	2.4	3																																3.5
6	19.1	0	4
9.5	7.7	3.6	1.8
6.2	19.9	4.4	2.4
9.1	18.1		0
5.6	21.5		0
5.1	17.1		5
6.2	13.1
8.6	9.6
5.3	13.5
5.8	15
6.2	13.7
9.5	9.3
4.4	10
3.8	8.1
8.5	10.1
5.9	15.1
5.1	11
7.9	7.2
10.3	17.5
7.4	10.2
10.1	9.1
4.5	23.1
8.9	0
0	9.8
9.8	7
4.6	10.8
5.5	11.3
0	10.9
5.3	19.9
6.9	10.8
4.3	9.4
5.5
9.3
