# Supplementary material for: Hunger- and thirst-sensing neurons modulate a neuroendocrine network to coordinate sugar and water ingestion
Source: eLife. 2023 Sep 21;12:RP88143. doi: 10.7554/eLife.88143 (PMC10513480; doi:10.7554/eLife.88143)
Supplement: Figure 2—source data 1. [file elife-88143-fig2-data1.xlsx]

## Sheet: 2s stim
ArcLight responses of BiT to optogenetic activation of ISNs
time (s)	fly1	fly2	fly3	fly4	fly5	fly6	fly7
0.667	-3.85551	-0.08838	6.37161	22.9039	11.541	2.67708	9.05832
1.334	13.5994	0.914898	2.70697	9.07158	-5.77755	6.68827	-4.07381
2.001	5.994	3.33711	-3.59948	-4.57718	3.5868	-0.17547	-2.64314
2.668	10.6979	-1.6973	0.140744	-3.87058	2.57416	-3.82828	11.5965
3.335	0.663042	-0.76826	3.25776	0.079003	-3.23823	-6.26295	11.2593
4.002	-8.97624	1.44141	-3.83175	-4.76376	-1.53727	1.84037	10.0997
4.669	-0.27202	-0.79009	2.10789	-14.5185	9.00415	-2.63798	9.15059
5.336	-1.63705	3.89487	5.30372	1.10808	1.77522	16.6063	1.25567
6.003	-8.94267	-3.65163	-0.19471	9.62048	5.17783	-3.0425	-0.3525
6.67	7.25814	4.02685	3.63658	-2.94965	5.48828	-8.13954	-9.81117
7.337	10.6324	0.902061	1.42093	-12.2713	0.066744	-9.5907	9.68437
8.004	-14.9217	1.71189	1.57816	10.6099	-4.02377	-4.4953	5.63883
8.671	7.48764	-3.30402	1.04527	7.31096	2.87284	0.643453	15.0288
9.338	-1.3283	2.91512	5.59642	-22.1735	-0.29161	-6.35067	-3.22056
10.005	-14.8258	-3.2234	-2.54057	-8.09345	6.01145	7.16385	-12.0682
10.672	-5.62738	-0.93544	1.03286	-11.4832	-0.74729	-3.00205	-11.4089
11.339	-15.4217	-4.17729	-3.77967	-2.5734	-1.19924	5.09573	3.43393
12.006	-0.31238	-5.70349	1.90664	6.38419	-5.99014	4.6182	-0.02805
12.673	-3.41993	1.03495	-2.35604	-1.47652	-4.61918	-1.08578	-2.38725
13.34	8.55216	0.130398	1.16634	4.67846	-5.25835	1.59563	0.071761
14.007	0.307528	-5.34061	-3.19532	-8.15161	3.02948	-7.54538	-10.0806
14.674	2.27756	-0.37181	0.596369	0.517617	-0.0145	-1.37718	-1.36391
15.341	12.7683	9.089	-7.91289	4.70401	1.46961	-3.90223	-14.956
16.008	6.02856	0.870314	0.481963	29.91	-1.3074	-3.10778	-0.38946
16.675	17.2618	-0.10468	0.022986	-1.25196	-3.8458	0.283923	-1.29941
17.342	8.23192	1.67826	0.280433	2.83599	0.313721	4.54809	1.08212
18.009	0.807922	-3.44697	-0.07453	14.9864	-2.95146	0.262813	8.63975
18.676	-5.92876	3.35429	-2.29108	-2.95929	-3.4233	11.6188	3.28042
19.343	2.99216	0.923083	-0.75046	-0.33543	3.40947	3.10054	0.911667
20.01	4.00154	-3.97185	-4.81697	-0.94621	-2.17451	-3.67188	5.849
20.677	6.31794	16.9591	2.08151	47.0834	9.94562	4.47345	-4.2526
21.344	-0.56008	25.2096	2.92675	58.1528	11.01	17.5431	1.41966
22.011	21.0458	20.4202	6.69127	27.3724	10.7084	16.0575	12.7022
22.678	0.453326	3.78401	0.003675	-8.76834	3.21321	-2.31314	4.74137
23.345	-13.7577	1.64868	-2.07301	9.77087	2.40001	-11.663	13.4782
24.012	7.84738	-5.11978	-1.96991	-24.8134	-2.85265	-5.91262	11.1053
24.679	1.39433	1.04309	1.98702	19.0934	3.20404	3.64672	5.1831
25.346	-1.56775	3.28115	-1.90814	-13.7877	5.18069	0.26682	2.54831
26.013	3.10249	2.66226	2.43078	-13.1995	3.77258	5.27999	7.01159
26.68	4.2385	-3.47695	-0.9489	-0.90935	4.7331	-3.7064	6.03381
27.347	2.44117	0.460107	2.53572	-4.98464	-1.71233	-1.83327	-0.18517
28.014	-1.66989	5.29557	1.73987	10.8718	2.53475	1.65783	-3.35851
28.681	-1.34973	-2.46502	-4.75165	-8.05912	-2.1851	-2.10758	1.73421
29.348	-5.14116	1.81082	2.18985	-22.0737	-1.67583	-3.82756	-0.4849
30.015	2.26035	-0.21219	-6.15176	-3.01389	3.07321	-5.21419	9.14166
30.682	6.81207	-0.07855	-5.10773	-15.8243	-3.28184	-6.35059	-16.4923
31.349	-0.73134	-3.35506	4.0308	-2.57958	-3.28954	-17.6622	2.67996
32.016	1.27035	-8.77687	0.184289	-17.592	-5.79411	-9.52718	0.030905
32.683	6.34577	-5.10404	3.37114	1.86285	0.270105	-6.44676	1.81228
33.35	16.214	-2.662	-2.97249	-35.3883	0.773792	-4.49635	14.5147
34.017	4.90158	-3.09034	4.33821	9.54397	-2.76828	-3.36372	-5.78786
34.684	6.30976	-5.55131	3.52719	-14.6152	-2.24991	9.05694	-2.97369
35.351	-4.14344	0.424074	-5.24358	-8.97855	-3.47735	-2.31525	-6.02032
36.018	-1.58179	-0.12593	2.45945	-21.4891	1.6175	7.54529	5.93258
36.685	0.554295	-2.11171	-2.64465	-7.00907	-8.8351	2.17973	14.1262
37.352	6.51394	-1.5722	2.08604	-7.60725	0.272682	1.04261	4.6578
38.019	9.47469	3.40968	0.089964	-11.2762	-4.89403	2.39788	3.10363
38.686	2.8904	8.79434	-5.12651	-12.2883	4.4569	-2.66106	6.53164
39.353	-3.36593	-3.60632	-0.0309	4.4841	-7.17798	7.14716	0.436652
40.02	2.27934	3.28806	-6.80153	-10.6481	-1.21754	-8.28772	0.812001
40.687	10.6178	1.95336	-6.96369	0.514435	-4.32621	0.526284	2.34851
41.354	13.9386	-4.79712	-4.9773	11.6772	-3.50694	-4.19427	8.55633
42.021	12.365	-4.00046	-0.8273	-10.9479	-4.26496	2.18978	9.49401
42.688	10.1421	0.917745	2.26076	-1.88405	-4.72818	9.49607	12.4762
43.355	11.9346	3.21803	2.6047	-19.4096	-6.31101	10.9954	5.72066
44.022	6.48056	-0.77498	0.652493	-0.56199	1.28265	2.26147	9.90604
44.689	2.56416	2.50041	-5.06548	14.3288	-3.40891	6.81122	8.06114
45.356	-1.63752	-1.21205	3.69741	1.61908	-4.57958	4.12215	7.39113
46.023	11.4637	-4.99125	2.54843	9.81107	-5.56506	2.12112	3.28513
46.69	7.63055	5.69092	3.46795	-1.33868	-1.9266	-7.05187	16.1084
47.357	-15.7534	1.3083	-3.65182	6.83185	-8.45826	8.0156	-6.31023
48.024	-1.97241	-5.95385	-1.68718	-11.7261	-2.70874	7.52925	11.49
48.691	-4.69642	-4.85524	-1.41815	-18.2429	6.34523	7.43168	11.2256
49.358	2.3083	0.423643	2.32623	-26.6026	1.89455	7.82645	7.53237
50.025	16.358	-2.64595	-0.51171	19.3724	-3.73337	2.46222	14.8804
50.692	12.8171	-8.03649	1.49313	-29.938	-7.72813	-3.1594	9.74654
51.359	7.89896	1.51451	-5.47547	-25.0582	-2.61227	1.23364	6.50787
52.026	-1.38277	-1.9961	-6.70197	3.58835	-2.80263	10.4411	6.76643
52.693	20.3831	20.8887	0.994173	32.2919	14.49	13.9501	11.2612
53.36	34.1909	19.1828	-4.81523	21.4563	14.0589	5.2586	18.8876
54.027	12.6737	14.0377	-5.94889	17.4981	10.258	-2.6072	11.337
54.694	22.8682	3.24206	-5.46176	-8.8981	11.544	-5.29339	13.414
55.361	5.23397	-2.70116	1.91269	8.84022	-1.39335	-5.48996	1.79386
56.028	1.32344	-0.03704	0.896636	6.72309	1.08155	-1.74381	9.61806
56.695	17.8906	0.556161	2.5734	-9.28026	1.68325	-7.69641	7.36924
57.362	3.20352	-1.67397	-0.90193	-1.78116	-2.25513	12.3318	15.9637
58.029	10.9977	-3.91232	-0.46871	-8.26763	2.07564	-8.48097	7.2497
58.696	11.4643	-1.06957	0.081583	2.63347	2.13164	-5.24542	7.77564
59.363	3.89781	-6.62797	3.2999	-6.07994	-6.75188	-3.3355	10.6509
60.03	5.15648	-0.92351	8.12109	-8.6616	-1.28622	-5.40038	5.63277
60.697	5.36955	-0.94981	4.07214	-21.5547	3.3769	-2.56095	4.18009
61.364	2.41499	0.203178	-0.14011	-11.4153	0.861221	-7.40416	7.78603
62.031	6.25958	-0.71079	-2.5861	0.931871	-2.15133	3.9183	8.76795
62.698	-12.0053	1.68894	-1.92288	-25.4215	-3.21294	-3.51152	3.62531
63.365	11.561	-0.77215	-3.47059	-8.40482	1.78215	5.58607	11.3723
64.032	-2.13041	-4.90626	5.01139	24.4422	1.89079	1.47831	5.43767
64.699	3.55753	4.83165	-0.81746	-19.2758	-7.76495	-1.33607	7.50673
65.366	1.88762	-4.80477	-2.68008	-9.54629	-0.7354	1.76792	12.9721
66.033	8.98748	-1.55972	2.03566	2.26528	-1.48029	6.89182	6.47323
66.7	1.59105	-7.31037	3.95517	-1.56428	-5.18944	8.61453	16.6221
67.367	13.737	-2.00229	-1.44047	6.07418	1.59543	-1.19075	14.1803
68.034	19.6934	-0.06693	2.12906	1.72904	0.373537	-4.09401	8.34554
68.701	16.8637	-4.46334	-0.60871	15.9413	-2.23602	4.18332	2.57379
69.368	20.988	-1.79131	1.16254	-9.54561	2.17656	4.96314	9.31161
70.035	0.181362	1.54367	-1.14801	3.07932	1.61562	4.59391	9.79473
70.702	16.4988	1.75301	0.738819	-10.7443	-3.21646	2.911	3.08403
71.369	13.3415	3.03502	2.30753	7.84991	1.5119	6.81248	4.94124
72.036	20.0202	0.840921	1.99715	0.555938	-8.00587	-4.83847	9.61457
72.703	5.57076	-0.57432	2.50661	-3.91623	-4.63783	2.61278	10.033
73.37	9.10723	-3.39498	5.34853	5.43232	-4.28064	2.99435	16.8739
74.037	10.3842	2.01682	-3.11973	-10.6378	-5.70971	5.59708	7.35106
74.704	13.6046	3.15445	-1.21419	2.39777	-2.93971	2.2909	15.5089
75.371	19.4347	-3.43104	6.05839	-22.8722	-4.67995	2.29921	6.99971
76.038	20.2661	1.95844	2.53507	-17.3487	-2.01386	3.06713	13.7647
76.705	11.6801	-4.86027	1.74968	-1.23632	0.384132	-7.11982	11.8885
77.372	12.1226	0.871937	3.6391	0.080719	-2.61552	-1.61276	4.03141
78.039	17.0403	-2.05632	-3.95682	6.70291	-3.38103	1.63336	7.12197
78.706	14.521	4.35583	-5.92103	-19.4487	-3.5483	1.96556	24.1192
79.373	3.22206	-1.28344	-0.96331	-7.48044	-4.84728	-6.79654	12.9448
80.04	11.5014	-1.57522	-1.94193	-8.04664	0.393233	-1.03896	12.1546
80.707	11.7422	-2.63147	4.28934	14.9717	-0.85299	-1.51889	15.249
81.374	11.0807	3.35578	-0.80843	-22.1883	-4.6373	-2.44806	12.8375
82.041	2.9731	-6.12188	2.88002	6.34671	-0.49437	2.0853	5.57258
82.708	18.2452	-0.52964	1.08593	-6.40448	-3.71641	-4.52161	16.4479
83.375	3.88989	-2.32583	7.83855	-15.8764	-4.0037	-4.60362	19.7942

## Sheet: 30s stim
ArcLight responses of BiT to optogenetic activation of ISNs
time (s)	fly1	fly2	fly3	fly4	fly5	fly6	fly7
0.667	-5.42015	4.01575	1.11773	-2.80518	-0.77204	7.64593	5.33647
1.334	-0.55941	4.25873	4.08746	-0.31196	0.10748	9.70627	5.06443
2.001	-3.18549	2.00286	0.568746	5.32117	-4.49135	-0.79491	0.686996
2.668	-15.3283	3.53015	1.22616	-12.0301	1.05962	7.92136	-3.08171
3.335	2.02945	3.25451	-1.26439	-12.5987	-1.51637	-7.81394	0.614588
4.002	-9.21064	-0.6762	-6.01277	7.71843	-0.72589	-3.67377	6.27479
4.669	-5.08164	-0.73817	-5.76365	12.8461	3.71987	4.19641	7.13337
5.336	-0.56401	7.72863	-1.91874	4.2307	4.62334	-5.59503	-9.75558
6.003	12.3939	-6.82434	-4.04322	-7.18378	4.16078	2.63156	-8.12841
6.67	-2.83467	-3.1684	1.77905	-4.76395	1.36327	-0.01731	9.59192
7.337	0.328986	-0.31638	2.9691	4.52428	1.60749	-4.7134	-3.12743
8.004	-0.12414	-1.70931	-5.73467	-3.53783	-0.58887	10.093	7.54421
8.671	3.84404	0.038113	-2.09538	-2.51111	-2.23392	1.45453	-2.57675
9.338	6.2415	1.29453	2.44349	-13.7727	-3.81057	2.06272	-2.84892
10.005	-4.6352	10.2117	7.76219	-4.21322	3.43214	2.38647	2.9118
10.672	10.7364	4.57857	1.08326	-2.04588	-0.38226	-3.19407	5.5161
11.339	4.53381	-2.00486	-4.91333	10.3749	-2.88004	-4.68411	-10.5759
12.006	-1.2918	-8.65287	-0.41743	2.31674	-2.75589	-4.36481	-0.78835
12.673	-4.86612	0.015683	-2.92576	-0.93252	-4.32412	-5.48519	2.51645
13.34	-2.23613	-2.80937	-6.48156	12.1348	-0.13637	-0.09251	-3.51058
14.007	2.70259	3.17037	-0.94392	6.54432	-3.39586	2.84763	-3.24896
14.674	10.9311	1.11238	-2.74216	-15.2415	4.46192	-1.57555	0.966355
15.341	-4.643	2.81406	4.96844	8.44469	-3.88902	4.23599	4.26713
16.008	1.19566	2.48651	6.01905	-4.27403	-4.32869	-0.05473	0.475141
16.675	-8.40915	2.05742	7.50514	-6.66571	-0.71193	-3.20422	-3.21641
17.342	0.506369	-3.54854	3.7157	-13.7233	3.14028	1.19024	4.99046
18.009	-5.96088	-3.87154	2.28715	2.5977	-1.71518	0.854658	-4.97309
18.676	-3.55701	-1.18802	3.46001	7.13286	5.36951	4.70145	0.562656
19.343	-12.4466	1.26206	3.04882	-2.50075	-0.88378	1.3615	2.81831
20.01	-0.93082	-3.40666	4.05823	18.1827	0.34556	-1.10506	-9.0378
20.677	-4.1057	17.7545	4.64377	25.436	5.68112	6.62758	-5.39894
21.344	4.45878	14.1654	9.70518	5.14439	9.6375	-0.02184	12.409
22.011	-7.96286	3.07817	6.34012	5.42687	-0.26727	3.68695	7.21864
22.678	6.97319	15.1585	4.20786	33.0533	8.48902	-9.52792	-0.43235
23.345	3.91073	4.40926	0.630814	11.025	6.37708	2.72128	4.80532
24.012	0.728573	2.87406	-2.22863	0.922186	-0.35019	-0.72926	10.8557
24.679	3.04646	18.1991	9.12604	10.8237	5.97224	-3.2243	8.05544
25.346	4.37599	10.1199	2.46219	5.05898	5.90423	4.48923	5.95651
26.013	3.93998	3.30748	8.23429	-8.98332	-0.38805	-2.16943	6.30623
26.68	-0.1442	13.7352	5.04623	19.2393	8.48442	-2.74611	7.30062
27.347	0.91992	7.20141	11.4087	24.7022	6.66673	5.87829	-8.01737
28.014	-3.88103	1.84882	6.35371	4.17384	-3.74365	-1.20631	6.34184
28.681	-0.6668	15.7118	8.22424	25.2885	4.55697	-1.92691	4.39444
29.348	5.77179	8.40808	2.55811	14.7176	5.86184	-5.94088	-3.08611
30.015	0.158384	-1.68672	6.19349	-2.14976	-0.57385	5.67415	0.537564
30.682	3.0525	14.0028	0.726927	23.9342	10.6329	4.7954	7.95785
31.349	7.48179	0.087114	10.1356	3.07086	12.8993	-1.71421	7.82052
32.016	7.38579	0.659425	0.824912	-9.1297	2.00512	-1.18458	1.80091
32.683	2.60296	9.72237	10.3984	26.1268	15.4155	1.43273	0.045711
33.35	8.13658	5.81572	-3.96646	-6.47868	5.17782	1.79897	1.64545
34.017	1.11603	0.593954	6.16568	-9.4477	2.78208	-9.95725	-5.65172
34.684	9.47456	11.988	9.00276	25.2819	16.9787	-2.829	0.374792
35.351	3.36407	6.28439	5.20292	1.03491	9.0126	3.69848	-6.27361
36.018	1.33374	-3.24709	5.80692	3.93809	-3.87014	-4.57939	0.02332
36.685	8.21749	17.2511	2.75998	0.847852	8.69536	-9.71483	-3.49274
37.352	-1.91965	-0.81284	7.47749	2.6525	7.83016	-3.46697	-3.70694
38.019	1.8457	0.967349	9.0606	-6.03631	2.07667	8.97412	-7.06579
38.686	5.808	9.05634	9.01981	10.1734	5.85935	-0.57057	-9.43502
39.353	1.06994	2.70062	12.8439	-7.02639	0.237935	0.653302	-2.72668
40.02	-0.03976	-3.5916	2.69935	9.39338	1.01625	-5.36473	1.74518
40.687	13.2107	14.0052	3.27671	14.6875	12.9217	-5.21041	-9.91305
41.354	4.37546	5.20477	0.985068	9.1778	3.91684	7.98906	0.301604
42.021	10.1503	4.32813	7.81913	-11.8973	-5.56089	3.17177	-1.24387
42.688	-0.26805	14.3517	10.7657	10.2669	11.3835	-10.8365	5.69566
43.355	-1.2296	11.4065	10.3106	4.19618	3.01754	-5.83343	7.24646
44.022	3.08716	-0.70702	6.48163	-10.0084	1.48215	-4.88964	-0.35193
44.689	2.93254	14.9399	8.76009	19.8053	9.16072	-3.90294	3.33251
45.356	13.3186	13.4857	9.28494	13.3533	-1.98383	1.56662	-2.64178
46.023	8.41884	-4.50686	11.8574	-7.80545	3.81378	-0.53444	-3.79762
46.69	2.16673	20.2107	11.1785	20.2457	8.41468	-5.37597	6.98098
47.357	1.19652	2.23466	3.55797	13.7285	7.32864	-7.2613	9.16241
48.024	-7.82916	3.15599	9.05248	1.60411	0.685325	-14.2242	0.843203
48.691	7.99769	11.3725	12.3361	17.9677	9.59241	-14.7799	7.16294
49.358	3.70227	4.84366	5.92538	1.37802	2.77645	-5.6966	9.98758
50.025	-0.90959	-3.1735	13.6596	22.0951	0.958813	-7.9748	3.88633
50.692	-7.19528	3.30795	7.68386	-6.4172	3.60392	0.825633	7.50869
51.359	0.121912	-1.41312	3.18091	-13.5344	0.495228	-3.54772	1.94885
52.026	4.81575	-1.72134	5.1002	-8.05443	0.241102	1.94325	-4.8285
52.693	12.4811	-3.05169	10.0173	-19.1634	0.708504	6.77024	-4.69993
53.36	4.61441	-1.35652	9.72242	-1.37664	-1.86756	-2.40192	-1.06213
54.027	13.8943	1.80782	5.88855	-14.599	-5.00348	1.4456	3.38873
54.694	9.54265	-3.57474	6.8284	-5.12731	-1.8298	-2.36424	-0.91398
55.361	-9.20587	0.707434	5.67715	1.52654	-3.4557	-3.58602	5.38685
56.028	-13.2999	-0.29605	6.42828	-10.478	-1.44292	-2.41351	1.29224
56.695	0.497387	-7.67865	16.6532	-15.4082	1.24255	2.92809	1.75271
57.362	-5.15083	2.71392	5.90887	-11.3043	-2.10011	-5.99254	-4.93086
58.029	-0.74856	0.740103	7.11809	-4.64881	-6.37166	-3.6984	-5.32121
58.696	8.0486	3.84477	9.29294	-10.5168	-6.09827	-6.9481	4.8408
59.363	2.5721	-5.0286	11.1844	-10.0314	-2.05774	-7.16746	-11.4295
60.03	5.01657	1.33767	8.50716	-7.45603	-0.93889	-12.1221	0.013076
60.697	-0.86285	-3.04248	3.18842	-5.75907	-4.37341	-4.34045	-3.88222
61.364	2.63172	-1.43173	8.66845	-3.23614	1.26607	-5.04283	3.61705
62.031	14.062	-3.99533	5.94921	-9.0896	-6.67788	3.73024	12.9065
62.698	4.43739	-5.42519	8.56853	-2.23233	-1.90551	-3.77921	8.93587
63.365	2.67638	-0.63574	12.992	-17.723	-1.79973	-3.02459	10.367
64.032	10.8418	-5.30934	6.43373	-6.02091	-0.18429	-2.18149	-3.5399
64.699	5.77313	-0.0768	-0.02519	-24.6379	-3.35405	-7.43477	-0.01734
65.366	-14.1915	-2.98561	8.40134	5.30924	-3.60262	3.4654	2.24024
66.033	0.101378	-3.35747	2.20855	-11.428	-8.89108	-0.02108	5.72632
66.7	-10.4421	2.39107	12.8023	-16.5469	-2.34799	-2.29025	1.35032
67.367	8.87881	-4.49065	5.43078	-2.58851	-6.44789	6.08147	-1.48831
68.034	2.88036	-5.5405	13.5298	-0.70869	-7.6081	-3.3369	9.98684
68.701	-2.57524	5.23447	11.7965	-12.9923	-6.76147	7.69069	0.990779
69.368	9.81854	-2.42969	10.1676	-19.7982	0.03642	-6.67094	-3.47509
70.035	-8.5284	-0.93991	14.188	8.99458	-0.13195	1.72159	-3.01119
70.702	6.74484	5.49114	8.19681	-8.48136	-6.34868	-2.7199	0.473651
71.369	3.76302	0.758304	12.0604	-2.61184	-5.26563	-9.28434	0.799356
72.036	-10.3131	2.07808	10.9982	1.01524	-5.72665	-6.57351	12.2076
72.703	-6.74585	-1.1237	13.1931	3.05057	-1.51624	10.3651	-3.18194
73.37	-8.45631	3.15939	14.1894	0.430344	-6.01873	-7.42308	-3.99325
74.037	3.28294	-3.01637	2.98414	-7.73822	-8.98279	-8.87323	-2.12378
74.704	-0.79172	6.98159	12.9297	-29.7576	-2.28093	-9.3845	-0.22705
75.371	3.43397	0.380338	8.87095	-12.6042	-4.07022	-1.62463	7.37318
76.038	-8.23962	1.25129	3.01234	-7.147	-6.68219	-8.21964	-3.10765
76.705	1.31744	11.5352	8.79735	-17.7182	2.47923	-6.09821	13.6473
77.372	-8.95163	-4.02487	7.03962	-2.00364	-9.52491	-3.79724	-2.92717
78.039	-2.09345	1.70946	2.46385	-7.98948	-4.92075	-2.8318	5.65127
78.706	-1.12478	2.82957	7.3568	-25.3951	-6.04648	2.16995	-1.56383
79.373	-0.67856	-3.60059	5.00891	-22.9397	-1.6989	-1.05434	8.17518
80.04	2.39771	-5.13287	13.1039	-9.30152	-7.70024	-0.47742	-0.7735
80.707	-2.91072	3.3391	8.09419	1.20585	-4.6031	3.19327	7.75978
81.374	6.06636	1.46464	12.3791	-8.70612	-0.44926	5.42375	3.08635
82.041	9.505	-1.28816	-0.09566	-16.5784	-2.41631	0.746122	5.85867
82.708	3.02298	0.71848	7.01484	-12.0818	-1.82924	4.36541	4.50398
83.375	-5.79724	0.35502	9.29241	6.03669	1.15229	1.85734	13.2073
84.042	-3.93222	2.82425	9.6871	-15.3216	-10.8748	-1.63692	2.58821
84.709	0.385668	0.712321	6.94305	-21.0513	-1.28296	4.76069	8.31743
85.376	-3.46737	5.13256	2.85961	-0.79545	-1.94852	-1.47537	-0.42845
86.043	-8.28978	-2.13127	12.1068	-14.8938	0.272264	-5.5448	-3.89202
86.71	-6.3793	-1.39893	21.9748	-16.9074	-3.88949	-2.84638	-1.90017
87.377	-5.21191	0.879252	7.52683	3.46227	-2.06575	0.428055	-0.17687
88.044	10.9336	6.16012	1.19858	-1.63474	1.97951	3.4024	-9.31217
88.711	7.82907	3.74483	4.30593	-3.15031	-1.19068	-6.91736	-1.03221
89.378	9.07641	5.52328	3.59878	-19.3414	-0.18491	-0.28225	-4.32026
90.045	16.4861	-0.39741	3.70281	-18.0597	2.53811	4.77773	9.10884
90.712	9.77928	0.266325	7.45402	-8.64977	-0.82546	-13.4568	10.6007
91.379	8.76864	3.97027	7.49447	4.35314	-3.06367	-3.20791	7.82985
92.046	7.99684	-1.76416	2.5805	-5.00092	-6.13097	-6.16839	12.1755
92.713	-4.24512	-0.2956	6.66453	-2.00428	-5.53053	-1.11979	3.52365
93.38	7.75538	1.05486	7.84091	7.1655	-2.6621	-9.80593	1.81475
94.047	2.38588	0.316191	3.2811	-16.721	-3.99379	-2.20702	1.096
94.714	4.48905	-1.82471	7.34373	-3.73224	-4.50272	3.20125	-0.33243
95.381	-0.89172	-1.00116	0.990856	15.7262	-2.28131	-7.68045	-6.45856
96.048	8.98833	-4.2508	5.1707	5.58675	-0.21026	-8.3119	-3.90529
96.715	3.20181	3.8219	4.7769	-12.5416	-1.34063	-12.1493	-0.96773
97.382	5.07576	1.60592	3.35855	-11.884	1.76152	-7.60723	2.1818
98.049	-10.9919	0.19647	1.40996	-2.14312	-4.1098	-2.79474	9.13227
98.716	8.52767	1.01536	2.73868	0.050392	-1.74733	-4.63184	-0.4758
99.383	-3.22062	-1.8112	2.13572	-17.9327	-1.79176	-6.43604	1.67012
100.05	1.56044	8.00122	1.68523	-5.99812	1.06954	-5.19989	7.72699
100.717	-1.12174	1.26907	7.3027	-5.76068	-5.53118	-10.227	13.3448
101.384	4.91566	-1.34764	2.59081	-12.2967	-0.43893	-1.79283	3.11916
102.051	-0.51005	1.35727	8.1367	-22.1754	-0.6784	0.363165	9.36969
102.718	-6.53851	-4.77431	7.37762	-21.5974	-5.80721	-2.53746	9.47593
103.385	-5.50942	3.52518	8.72763	-10.8076	-2.35593	-3.33358	12.0114
104.052	3.14876	9.68367	5.94845	-14.0266	-3.23955	-1.21045	7.32325
104.719	5.81238	6.24837	-0.53486	-15.9375	-0.58673	0.645549	8.49768
105.386	3.72697	-0.07049	0.59639	-11.3103	0.007856	-8.43236	3.99738
106.053	-0.70963	-8.08366	8.43631	-7.35128	-2.15162	9.31925	-0.87773
106.72	-6.08405	1.96066	10.4054	0.506874	-8.45882	1.08197	5.53194
107.387	-2.60391	0.276943	5.92862	-13.3912	0.332089	-1.34815	9.9733
108.054	8.16176	-0.14195	13.3365	-3.9901	-2.25555	1.01721	5.18358
108.721	-2.67787	0.56743	7.39885	-17.8885	0.816403	1.26785	-3.35384
109.388	-6.87729	-5.96829	9.65765	7.71902	3.11985	2.20579	8.12321
110.055	-16.7972	0.113027	7.60019	-17.0152	-1.21649	-7.45111	10.0518

## Sheet: 2s stim_controls
ArcLight responses of BiT to LED presentation
time (s)	fly1	fly2	fly3	fly4	fly5	fly6	fly7
0.667	5.67054	-17.6859	-1.73725	13.5582	0.79414	9.11057	1.10989
1.334	-1.27778	7.92417	4.67826	10.442	0.031592	5.564	-7.29992
2.001	-2.02589	-1.39397	-0.64205	4.53179	-1.33343	3.57347	-3.86046
2.668	0.21541	-16.2824	9.6931	-4.38445	-2.49134	8.41765	-4.55647
3.335	5.16659	16.0509	-3.37378	12.5046	-2.83103	3.42232	-4.79083
4.002	-2.1	-0.48603	-5.39171	-0.39446	-0.55433	-2.24942	-0.77415
4.669	1.69135	-9.27037	2.61379	4.34704	-0.7975	-4.10248	-2.38793
5.336	-1.22208	-1.55361	8.88974	2.94803	3.24066	2.74899	1.06752
6.003	5.07641	-2.48141	-13.1624	-12.6187	3.74962	11.1728	-3.042
6.67	-0.76212	-8.98612	2.51353	5.94135	-2.66166	6.47505	-0.39615
7.337	0.760272	-11.9096	11.3848	5.95778	-2.80875	-1.86088	0.886855
8.004	1.63269	10.7559	-0.94109	-2.90232	2.1566	-0.90767	-5.65282
8.671	2.40576	-1.43992	5.91344	7.68065	2.52084	11.7047	-0.64052
9.338	1.32993	3.34336	-2.78721	-9.6475	-1.83788	4.6944	-0.32595
10.005	5.69495	0.835102	-2.99567	-6.7939	-0.27724	6.69246	1.62685
10.672	-1.74305	1.78782	6.99974	-5.60348	-5.66705	-3.99524	2.57146
11.339	-2.22413	-8.34173	-13.115	-1.29404	0.171336	-3.41199	4.45931
12.006	-3.62649	2.06769	-3.43124	-14.4732	4.72268	-9.67739	0.514112
12.673	1.26056	22.4134	-15.4377	12.8191	3.91973	-3.47021	4.51839
13.34	0.356997	5.26599	-3.35073	-4.11761	-2.51195	-5.51657	-3.57673
14.007	3.04237	6.76166	0.49083	1.37383	-2.15033	-13.6018	2.57685
14.674	-7.67687	-3.04008	10.3869	-3.93379	2.16409	-4.68128	2.42629
15.341	0.816063	-0.71835	-6.14208	8.46831	0.126489	-2.25107	-1.42002
16.008	1.28791	1.76421	18.2989	6.54257	0.89007	2.06309	-0.59381
16.675	-2.18719	-17.3562	-9.79465	4.30697	-1.3681	-0.48525	-0.66925
17.342	-6.45568	10.006	6.23369	6.48053	-0.94577	-0.33817	-0.96882
18.009	1.56782	-5.08464	6.87063	-3.39009	-1.20089	0.235936	-1.6754
18.676	1.07452	5.66695	-4.04654	-1.69709	-0.88064	10.7621	1.47593
19.343	2.777	-14.3823	3.21998	-9.10322	-4.46951	0.811352	2.81667
20.01	0.148687	2.36266	-9.19445	-8.89034	0.87864	2.83742	-1.99189
20.677	20.3999	8.70658	1.63382	39.9596	-0.88361	5.04615	-3.9499
21.344	23.214	25.2062	-3.01789	27.5774	3.17264	-7.83811	-0.58197
22.011	17.3274	4.88503	-0.11867	27.3439	1.40867	-7.2608	-4.41416
22.678	-6.77691	5.74338	0.568309	-14.6984	-1.24657	-3.35044	7.64998
23.345	-0.53813	20.7773	-1.59255	-4.61843	-1.76327	-2.90079	7.20027
24.012	0.677481	-0.47843	-8.05046	3.87699	0.461532	10.8279	-1.15469
24.679	-1.76283	-2.15054	-9.45077	-6.91941	1.37326	3.99775	-0.37359
25.346	2.00053	-4.76856	2.16085	9.67371	-2.30581	2.11819	-1.69787
26.013	-5.52621	5.98654	-1.91778	-6.74109	-0.72438	4.14637	-5.54858
26.68	-0.07498	12.6125	13.0823	-1.62622	-1.80416	-1.48695	-3.52363
27.347	-2.30994	-3.08278	4.23539	-15.734	2.07538	0.999755	0.43523
28.014	0.707056	3.4798	-4.04562	2.81735	1.89856	4.7065	-3.47568
28.681	8.92272	39.4388	19.5938	-2.96615	-0.72411	0.170788	1.64269
29.348	-0.50019	-3.99242	2.25917	6.9204	0.49666	-0.93214	1.34131
30.015	-1.22557	18.2517	-6.48218	15.8699	-6.44094	4.01131	-0.03787
30.682	1.81355	0.828682	16.0733	-6.35744	-3.8508	-2.54496	1.86753
31.349	1.74647	4.16954	-7.53791	7.74456	-3.14633	-0.57817	4.4524
32.016	0.911429	7.05958	-15.1798	-7.26636	0.96045	5.42769	-0.916
32.683	-0.07097	13.2916	-13.654	-0.03408	5.20986	-1.73709	4.02554
33.35	-4.33399	13.3179	-6.10367	9.30246	-4.49768	1.60864	2.08665
34.017	-5.13167	12.9079	-0.21861	-5.54535	-2.45241	6.99977	5.95343
34.684	1.94623	31.2496	-5.8513	-6.78105	-3.29154	6.01036	1.77163
35.351	0.769301	0.868547	9.3996	-2.6869	-4.7693	1.44784	4.02414
36.018	0.928576	10.0009	-6.16648	-2.05694	-3.75418	6.45932	1.48897
36.685	-0.04832	3.9506	4.72431	-16.4649	5.15357	5.69138	0.289536
37.352	4.74085	-5.21542	-0.7	13.0804	-0.31135	5.00741	2.12789
38.019	2.03483	5.64593	9.05542	-2.82135	0.71143	3.9086	0.195487
38.686	1.58481	8.26224	-5.98859	-1.98312	-0.22322	-0.69441	-0.09086
39.353	-1.39037	6.61053	-8.75016	-7.10046	-7.60752	5.83674	3.32594
40.02	-3.5555	21.2564	1.93242	-0.80322	-0.03434	1.70154	-4.261
40.687	-12.8646	5.79326	0.953044	-11.0514	2.28551	8.52124	5.2383
41.354	-6.0471	3.41316	-7.96688	1.47695	-2.83638	4.76461	1.63379
42.021	-4.10141	-0.99898	6.66834	-2.31038	-4.38988	4.42351	2.81907
42.688	2.22585	16.4026	7.94685	-18.486	-8.38434	10.0138	0.027665
43.355	-0.37349	34.4855	3.29502	4.74076	-1.00179	0.721303	3.5421
44.022	0.188091	-0.81919	-2.10913	-10.3637	-4.44194	8.15402	1.08357
44.689	1.25487	17.816	7.78996	-2.96097	-1.08393	8.88528	3.90576
45.356	2.94481	-9.80099	0.799175	-4.76011	-1.57794	2.95401	2.80443
46.023	-3.83439	-7.52252	5.545	-2.349	0.82529	12.0661	1.55478
46.69	-2.17297	17.8003	-2.62541	-3.77119	-1.63301	20.14	-1.89549
47.357	-3.0394	-0.35538	-5.02571	-5.53364	2.76409	7.49081	-6.68973
48.024	-3.45222	-0.3713	-14.981	-12.8354	2.89269	0.343418	-6.26549
48.691	-4.24979	-1.85529	17.2407	-19.5355	-2.14761	5.18632	0.713342
49.358	-0.6338	5.15929	-16.8773	-4.31246	-2.20081	9.94205	-3.49309
50.025	-5.11751	19.6387	0.565945	-19.2542	1.00168	5.16402	-2.82845
50.692	-4.18487	17.4536	-7.09413	-6.09096	3.67141	6.42046	3.5851
51.359	-4.24947	27.559	5.20019	-13.3428	2.5278	4.5911	0.009718
52.026	1.59479	19.1839	-1.43817	-19.331	-0.59515	6.01037	0.800196
52.693	9.05911	17.1519	15.7278	7.89498	-2.21677	-2.81781	-0.55841
53.36	18.2397	28.7334	13.3342	20.9515	-1.29153	15.1301	2.71583
54.027	19.9847	-2.49129	-14.4195	24.625	2.68343	0.765648	-3.32656
54.694	4.02301	-7.11069	3.55388	-7.54932	-2.12785	1.89979	2.08674
55.361	-3.65277	2.95218	-2.39185	0.245976	-6.89765	4.16047	1.79347
56.028	-1.77481	3.33406	20.3503	-14.0334	0.626267	-5.89874	-4.9724
56.695	-4.86721	9.64022	-6.57943	-2.48321	-0.35745	-0.16595	-6.87261
57.362	5.10524	7.6165	1.26601	0.513625	-1.09977	-3.01838	-7.44283
58.029	-3.3766	1.4346	3.16369	4.27255	-3.1042	-4.96673	-7.23733
58.696	-5.82793	-26.0156	1.03909	10.0086	3.97054	-14.7293	-0.93302
59.363	-2.07393	8.09817	-3.57713	2.9531	4.15036	-4.37132	0.728031
60.03	-5.05104	11.8488	-2.36984	-0.51197	-3.31829	2.54269	-0.51412
60.697	0.790304	-4.25087	1.57577	2.35516	4.97808	-0.51362	-3.58844
61.364	-7.61699	-1.99971	-2.80735	-4.20315	-1.92931	2.79429	4.10691
62.031	-1.37069	-8.90244	3.24771	12.7442	5.6621	0.341886	-1.56715
62.698	-2.67483	6.44372	-1.34429	-2.25561	1.92838	10.5	4.99624
63.365	-3.67255	11.4993	-1.45091	0.570172	2.99933	2.50802	1.03361
64.032	0.25205	-0.50252	-3.49791	-0.0779	-1.45302	-0.59748	1.27076
64.699	-0.88155	2.55414	22.3142	0.764653	1.00922	0.125797	5.05486
65.366	-1.20739	11.3222	5.81117	-8.43039	1.26195	-1.69212	2.43763
66.033	-0.19269	0.662318	-11.7933	2.05757	2.03779	7.42512	0.91169
66.7	1.98052	-0.04129	5.36702	-4.37187	-2.80533	0.370191	0.28829
67.367	-3.1428	23.9711	-0.53982	-15.9877	0.686755	5.05888	-0.89043
68.034	-2.77476	21.1678	12.8437	16.2746	3.07041	6.08976	4.85103
68.701	-5.47858	11.3833	-6.63269	0.279937	2.64897	6.22293	0.958324
69.368	-3.2189	14.2632	7.35607	-5.12818	-2.07997	0.579139	3.98725
70.035	-0.75268	-12.6754	2.59813	0.32584	4.54533	7.32842	0.020447
70.702	-1.72538	9.58751	-18.5946	5.91864	4.79631	8.31903	2.6112
71.369	-5.62441	5.12182	-10.9289	13.7551	2.58228	2.95431	5.08738
72.036	-5.15642	1.18409	12.7201	0.797035	0.006696	7.0775	5.22592
72.703	-4.67957	-1.84692	-10.3497	0.99665	2.84048	10.0207	7.14156
73.37	-7.99408	15.818	-13.423	-12.859	0.010308	2.47778	0.571374
74.037	-7.87307	-6.61428	-8.0327	-9.04615	3.18596	6.22067	-1.40687
74.704	-5.70374	11.472	-6.94665	-9.45732	0.468809	10.6631	3.90437
75.371	-4.05215	-8.37707	-8.80038	6.85912	1.06798	4.11988	-0.26618
76.038	-1.75876	25.3064	-0.08444	-19.9611	3.12385	6.3666	4.34499
76.705	-6.7059	1.277	-0.48188	3.19744	-2.27963	6.45447	1.63135
77.372	-1.1924	10.6283	-1.23227	-7.22317	1.96054	4.40596	-1.55162
78.039	-3.80151	1.11809	7.83328	0.432403	1.40291	7.53457	6.9109
78.706	-4.43546	9.0009	-4.57561	-10.6817	-0.54547	5.98524	-1.26283
79.373	-0.2935	15.993	11.8858	7.02384	1.14746	0.267329	5.87349
80.04	5.01705	6.99617	-6.67328	-7.93629	-1.96076	-4.9533	5.01314
80.707	-0.39752	11.3726	-8.94194	-6.58758	3.60293	-10.7422	3.42044
81.374	-0.39539	4.51215	8.21088	-28.9022	0.798949	-1.85156	-0.52215
82.041	-4.2269	20.256	0.052245	-16.1986	-6.77583	-1.13852	4.91934
82.708	-0.16607	20.5004	-0.53495	-22.3345	3.6425	-3.74422	5.09497
83.375	-6.54802	5.42319	6.58477	-15.1805	-1.47305	9.38888	3.04896

## Sheet: 30s stim_controls
ArcLight responses of BiT to LED presentation
time (s)	fly1	fly2	fly3	fly4	fly5	fly6	fly7
0.667	-4.56959	2.53744	-4.25911	9.15381	-5.52364	-1.9768	-0.14111
1.334	0.01836	3.49374	5.64299	-3.21747	-4.14114	-9.05306	-0.02281
2.001	-6.28102	-0.33968	-11.8358	-3.55181	-0.96327	-2.09011	-0.41433
2.668	-3.86164	-8.75816	-11.4919	-17.2083	-2.00896	-3.77953	-0.95324
3.335	-3.16569	-1.2604	16.2075	16.5781	-0.90889	-3.96594	-8.75488
4.002	-1.75714	-9.39609	-0.0288	-1.73122	1.57913	-2.79652	-0.58193
4.669	-2.20305	9.99005	-12.2881	3.67111	-4.41055	-1.82969	-1.17163
5.336	-4.66156	-5.98782	-3.55929	-0.5014	-0.52481	-6.31549	-1.85212
6.003	-1.11733	-7.51414	-7.71801	2.03446	0.056882	0.125595	0.02198
6.67	-0.47933	-3.23137	-1.62231	-4.05525	3.3834	-4.24763	-4.79184
7.337	2.56328	-20.556	0.566191	-3.78395	0.674189	-0.45827	-2.23271
8.004	-1.75791	-2.46674	-11.0753	5.74249	1.60583	-8.4501	0.939617
8.671	5.09124	5.82004	3.41494	-12.3894	0.605407	-5.27607	-6.85999
9.338	3.83722	-5.34372	-2.6599	-3.79291	-3.13501	9.387	0.406784
10.005	3.88568	10.8857	-6.30924	9.5817	-3.68029	-0.32912	1.15592
10.672	0.139261	14.5427	13.5421	7.95214	-1.0401	2.26654	-2.59885
11.339	-3.51195	3.02283	-2.47086	-2.70743	-0.75439	-0.19987	-0.60214
12.006	0.460468	-5.74378	-5.08458	1.40239	0.323298	-0.08235	-1.64668
12.673	1.09393	8.21331	2.92603	-3.49838	1.14041	0.977209	1.40863
13.34	1.12181	3.62156	13.4962	-4.78817	0.338	-1.39127	-2.54484
14.007	6.70545	16.0637	-5.79068	-5.74598	-0.63816	0.136464	3.93648
14.674	-0.15062	-10.78	0.220362	-4.42555	4.22473	-0.55641	6.02725
15.341	-8.30793	2.36071	-0.60479	3.46795	-0.9146	4.34659	3.78423
16.008	-1.75116	4.31591	6.21317	-7.99841	-0.81501	0.602167	-1.55827
16.675	-3.99027	7.78523	14.6591	2.31244	-1.0471	7.97588	2.87559
17.342	4.1605	-12.5009	3.86809	8.82531	2.89029	4.44682	-0.26101
18.009	0.226168	1.12275	1.80322	2.15019	4.11483	0.839545	2.20415
18.676	0.403251	-4.22385	-1.49754	8.27783	-3.97637	0.828961	3.94137
19.343	6.25537	7.68735	7.42856	16.607	2.05726	8.60943	1.22195
20.01	-6.16849	0.512381	0.630417	-20.8788	-2.00455	6.21577	-2.8455
20.677	20.8576	-4.8172	-9.55979	34.1146	7.27925	2.61443	4.84158
21.344	11.7552	-2.19343	-1.90184	27.454	2.0245	8.69792	-2.25352
22.011	-0.92749	-5.56001	-26.3922	7.13718	-2.53652	-3.37954	0.398639
22.678	17.863	7.18582	-0.42523	18.1698	5.27001	1.33354	0.277289
23.345	9.60918	-4.89615	14.2446	22.4835	-3.28377	-0.21377	-0.97323
24.012	1.67386	-11.1553	-2.10336	-6.70397	0.934632	5.66529	-6.1901
24.679	18.5063	2.07246	-8.7444	28.1142	1.30242	3.2307	0.668871
25.346	-0.1298	-12.0484	6.43232	26.0028	6.75087	-12.8916	-1.3079
26.013	-2.56718	-10.0261	-0.58362	8.0731	4.94932	-5.22507	-0.23726
26.68	18.9938	-6.54227	-1.09221	46.9392	0.603071	-17.1237	3.16514
27.347	1.48948	-12.526	-10.001	-0.82153	2.26992	3.93499	-0.56348
28.014	-3.91473	-13.6685	-10.4753	14.6259	0.776312	-0.8899	0.471715
28.681	7.95799	33.0775	5.56368	50.0701	-3.29478	0.779232	-0.8114
29.348	5.45255	-6.40816	-12.233	-0.23368	-0.97321	-9.60996	-2.44381
30.015	-3.28417	-1.86019	-13.3798	10.7519	2.22415	-0.87051	-0.35723
30.682	26.3505	4.15307	8.16241	37.3215	5.04488	5.86651	3.60679
31.349	17.6934	-19.0561	-2.67321	10.5989	7.2641	-1.77027	3.71318
32.016	1.59897	-4.18262	-6.42064	7.86944	-1.43193	4.20209	3.9804
32.683	17.4622	1.88086	-8.68368	20.2879	2.11948	-2.4559	-0.01618
33.35	-0.574	-13.961	-6.11473	14.1134	5.62498	-14.9202	-7.42095
34.017	-4.51153	8.81058	3.63564	2.13393	-5.49628	-5.36925	-1.72498
34.684	18.5313	0.037238	-6.49553	46.2628	2.08218	-0.82834	-4.57376
35.351	-0.97767	-1.74318	0.902149	0.72663	2.44069	-4.92783	1.84689
36.018	-3.24967	-1.98246	-7.64291	3.48245	1.87395	-4.69215	3.48917
36.685	18.508	1.35592	19.1172	28.2274	-3.54888	14.3807	-0.11793
37.352	9.93044	13.7768	-14.278	16.8373	-1.99	8.70366	-3.01919
38.019	-1.78472	15.5916	5.08163	6.70592	5.21442	5.62701	-2.64253
38.686	14.5935	-9.10515	-2.29193	34.0276	1.28312	5.55105	5.76352
39.353	1.74201	6.00317	-3.78357	15.456	1.41039	4.50861	-0.49467
40.02	1.05526	-3.87177	-2.45001	2.00152	-0.26345	2.73325	-0.89343
40.687	19.523	-8.18206	-8.14645	35.4101	3.78735	5.81438	-1.99576
41.354	6.58286	-0.19503	0.218891	15.5668	-0.59179	6.08184	-1.45604
42.021	-3.38879	2.18844	1.39274	-0.29379	-4.38145	7.33682	-0.4648
42.688	18.8112	-4.87889	0.685674	28.8652	-0.61124	6.03021	3.74459
43.355	3.36025	3.57334	-7.17033	24.7645	-2.4254	5.42717	1.3028
44.022	-1.83147	-10.5737	7.7466	6.33003	-5.29059	3.79005	-1.22024
44.689	25.4384	5.91578	-2.07435	31.8435	-2.84133	5.04158	-0.78299
45.356	8.42288	5.89759	8.73558	9.48155	-1.58579	1.03154	0.119333
46.023	-0.13208	5.06333	10.6785	-21.0127	2.2193	0.105028	4.49097
46.69	18.0172	8.89238	14.4711	28.643	5.38598	2.26634	2.20654
47.357	9.74747	8.79044	0.478177	32.3528	-1.05825	4.85714	4.75117
48.024	-2.28377	2.73651	-5.24706	6.6829	2.43329	-6.02217	5.26391
48.691	13.0624	-2.52102	14.1758	51.7467	3.5881	-1.46527	2.87441
49.358	3.28566	7.12067	-22.4374	19.2683	3.03042	-6.84851	-2.42331
50.025	1.51523	-4.21853	-9.89178	14.4863	-7.16915	6.86011	6.38134
50.692	0.829838	-2.74867	-2.38889	10.8294	4.73021	-1.1135	0.58849
51.359	-0.80592	11.5654	3.24639	9.0949	-0.59998	5.75334	6.98423
52.026	2.51547	6.48637	1.83494	13.3046	6.81307	-4.41027	2.43779
52.693	5.47127	-10.1584	9.96528	-3.89955	8.08319	2.83453	-2.77321
53.36	0.163809	-6.19239	-4.91159	19.2605	-5.13402	2.1251	2.71122
54.027	-8.69163	-8.72221	14.0821	17.4826	-3.14062	3.32789	7.82285
54.694	1.4319	1.31292	5.92782	-6.63186	2.97564	8.28162	5.32979
55.361	-0.54319	1.73639	-16.7988	-5.25635	-3.6727	8.27021	2.70702
56.028	-6.0212	-1.02462	4.4477	-9.96271	-1.62654	6.7965	2.06625
56.695	-6.03372	5.92132	3.75512	8.14563	2.86944	3.42387	3.18676
57.362	-3.34826	-6.79441	-6.51359	-5.74621	2.13523	6.51766	0.084123
58.029	-1.23511	0.161326	23.6958	16.3341	2.1239	7.63922	0.84833
58.696	1.1934	-4.25779	7.07959	-16.4811	-3.38506	12.7223	3.4753
59.363	-5.35091	-9.09014	12.8876	19.6665	2.58169	8.23303	5.53241
60.03	-4.66667	-11.6379	8.3836	-12.452	5.64138	8.36943	11.1419
60.697	1.67771	9.09327	0.088752	7.3039	0.132982	6.81918	11.7754
61.364	-1.87118	-10.2723	-8.9755	21.0345	-0.64608	10.1929	7.89824
62.031	-4.2457	5.37348	-2.94532	-0.85484	4.63792	11.292	7.10478
62.698	-3.70191	-16.2276	9.97082	10.7777	4.13249	15.5127	7.7397
63.365	-1.3022	14.7012	5.0464	2.95644	4.32428	3.38895	10.9492
64.032	-3.44576	-2.79503	1.14569	19.177	1.49151	4.38424	8.88888
64.699	0.412736	18.7779	0.283125	7.1591	3.1542	4.17592	7.99473
65.366	-3.88508	9.89665	-0.34484	-2.00399	-0.54871	7.00359	6.09158
66.033	4.30753	-17.8664	11.099	12.3253	4.55536	5.35478	6.78011
66.7	0.389296	-1.43775	1.17651	11.0455	-2.05693	7.30979	0.98608
67.367	-3.34219	-8.31603	-6.99574	11.7194	3.12152	9.46337	1.77731
68.034	3.58631	2.95984	-3.48541	17.9201	-4.39651	6.00155	8.96449
68.701	-3.03873	-3.14449	5.63016	6.9484	-0.3313	5.56629	1.62614
69.368	-2.25544	5.92962	-3.37347	16.1877	-1.68591	0.621021	-0.2186
70.035	-2.69963	5.15268	-0.84683	10.7423	2.6372	0.552264	1.25617
70.702	-1.50096	-3.15885	-1.17728	12.1928	1.1035	7.95306	8.32254
71.369	-2.16048	5.84602	15.2716	16.3192	7.08665	1.74042	4.71145
72.036	-0.04155	13.4523	-2.80495	0.431606	-1.82016	8.28482	12.6002
72.703	-3.61937	-4.4801	16.1202	-2.2727	2.4666	6.82768	11.9547
73.37	2.02219	-5.35063	3.03064	8.16424	3.19425	9.53328	7.37864
74.037	-0.12168	8.60782	2.59833	9.82378	5.1048	8.09137	11.7731
74.704	-3.85933	7.20051	-1.23562	6.04856	5.71579	7.06708	0.808758
75.371	0.803381	1.62927	-4.69112	3.60722	1.43464	11.1817	10.8556
76.038	-6.8108	-15.3263	9.11288	9.05576	0.12626	2.94366	5.66611
76.705	-3.45819	-5.62679	12.2504	10.3925	0.868875	0.766443	4.30825
77.372	-5.79876	-2.25437	-9.48351	7.23327	-2.18784	2.37246	11.6007
78.039	-2.26186	-3.15335	-8.33928	-0.48245	7.31531	12.6008	5.49249
78.706	-0.44389	6.92052	-3.74383	11.4139	1.1938	4.38879	8.64355
79.373	-8.79565	7.7869	5.54465	-4.04608	6.47678	3.11637	5.94445
80.04	-2.10881	12.6681	-14.6412	6.72849	-0.8024	4.53971	7.49382
80.707	-4.97435	1.51246	-1.09159	2.61213	-1.25426	4.8069	9.41529
81.374	-4.24839	-9.92439	6.37345	-6.97567	-0.73936	0.131607	10.5867
82.041	-8.71082	-9.78757	6.95535	23.642	3.64401	1.72899	10.619
82.708	-1.39481	-2.05329	-10.0094	13.1282	3.49874	4.01334	9.21687
83.375	-6.46994	6.9139	-11.7082	6.77676	4.65905	10.3374	7.94299
84.042	-6.81741	14.7201	-11.373	6.39914	-3.28266	9.49719	15.1938
84.709	-0.61471	-3.64602	-2.88843	19.9082	1.51806	7.29751	6.1913
85.376	-2.18651	1.67362	4.80597	7.42583	6.00513	5.74144	13.5533
86.043	-1.69113	-5.43695	5.55402	-2.96532	0.261654	-0.73401	7.80962
86.71	-4.66836	2.41578	5.75097	-0.1425	5.14629	7.50911	5.2105
87.377	-0.33521	3.85435	-4.49621	2.47246	0.8606	-3.09879	9.38056
88.044	-5.78658	19.1687	0.194544	17.8473	4.44195	3.47257	3.50745
88.711	0.684816	1.67927	-6.39582	29.1062	-1.27028	7.92561	7.7398
89.378	-6.45968	23.1002	8.67829	11.4656	-1.04642	-1.98827	2.92949
90.045	-4.19599	-0.98882	-4.20961	-9.20214	1.48999	1.3131	6.27374
90.712	-2.84003	4.84379	3.94144	11.2467	6.18968	7.31655	6.29522
91.379	-2.5712	8.78531	0.925242	37.2343	3.04781	3.98048	3.87981
92.046	-7.28271	-3.46533	4.45038	8.53496	-0.8806	2.15578	10.9396
92.713	-5.60983	2.43578	7.83133	22.4967	0.408334	-2.63644	8.42661
93.38	-5.18838	-3.27516	-0.9896	11.1328	1.79153	0.140543	10.1131
94.047	-8.05164	6.86619	5.88965	23.0471	1.33271	4.60299	8.00859
94.714	-6.0983	4.64578	9.67067	6.33988	2.76348	1.50604	8.61623
95.381	-4.78743	2.47126	5.961	19.7126	-0.38325	1.05275	9.84591
96.048	-5.9833	-7.42853	-8.25216	12.9573	-1.37627	-3.33256	7.83079
96.715	-1.66072	-5.74705	3.84377	22.4989	-2.84132	3.14721	10.3613
97.382	-0.00385	-20.4077	-9.30884	16.8566	3.3813	3.90446	2.38456
98.049	-3.78874	-11.7271	13.2728	12.1917	5.23312	2.76429	5.79925
98.716	-0.90908	0.741908	-1.93663	13.4951	0.472192	1.77613	3.49184
99.383	1.78498	-6.86343	2.56469	5.61309	-0.78325	3.16117	4.89012
100.05	-1.18146	5.62558	-7.9048	-1.10298	6.12784	5.70046	9.59499
100.717	-6.24456	14.1866	4.86219	4.66205	2.57933	11.8917	1.26212
101.384	-2.89325	6.46385	5.78741	-4.73751	4.93234	6.51543	6.00423
102.051	-4.26917	-1.49207	3.20451	13.0311	4.99012	4.76778	4.1386
102.718	-3.8528	-2.99294	17.8509	8.40241	2.36473	0.196523	3.8014
103.385	-6.29758	-14.8539	1.04438	25.8889	6.97689	3.158	0.102672
104.052	-7.58997	-0.48816	2.49706	16.2449	0.862326	-6.36122	4.75516
104.719	-3.59619	-2.96472	-0.77331	18.6989	0.975138	-7.21207	5.99393
105.386	-7.17354	5.63449	0.448596	36.2578	5.94311	-4.5424	4.00883
106.053	-3.693	-3.81955	2.32876	8.1577	-5.41982	-6.36739	-1.00081
106.72	-3.19834	-8.75283	-9.76785	14.0357	-1.41454	5.14732	10.4297
107.387	-3.60147	-7.02301	-6.88831	12.3371	0.271168	1.10137	-3.42634
108.054	-0.14363	4.53863	0.216745	2.75875	1.7133	-3.71307	-2.38792
108.721	-1.46589	-2.39646	-0.93585	21.7396	4.59092	-2.71872	2.64682
109.388	-3.8005	7.30072	-5.97031	17.0811	1.04089	-1.69948	1.95154
110.055	-3.4013	-4.12475	-13.779	-0.65212	7.88859	-6.99434	2.03351
