# Supplementary material for: Hunger- and thirst-sensing neurons modulate a neuroendocrine network to coordinate sugar and water ingestion
Source: eLife. 2023 Sep 21;12:RP88143. doi: 10.7554/eLife.88143 (PMC10513480; doi:10.7554/eLife.88143)
Supplement: Figure 3—source data 1. [file elife-88143-fig3-data1.xlsx]

## Sheet: 2s stim
GCaMP responses of dilp2 to optogenetic activation of BiT
time (s)	fly1	fly2	fly3	fly4	fly5	fly6	fly7	fly8	fly9
0.667	-6.41523	-3.26359	13.3148	-2.32169	-3.47901	-0.46031	5.68852	-3.76107	-6.09149
1.334	-4.61696	-2.44407	7.63371	0.656228	-3.51752	-0.45754	7.71887	-5.9721	-0.32001
2.001	-4.6972	-2.06735	7.72246	1.99182	-5.27878	-1.33097	9.7528	-4.16122	-1.41009
2.668	-4.14498	-2.57677	5.55249	-2.09617	-1.00153	3.97949	9.31307	-3.76966	-0.46572
3.335	-2.94413	-2.12256	5.37495	0.956075	-6.39625	-7.46642	3.68042	-0.62979	-1.56366
4.002	-1.46119	-1.88906	6.98781	-0.54824	-1.93466	-3.98778	-0.67142	0.420362	1.22927
4.669	-1.10777	-1.28696	-2.37498	-1.88304	-0.27016	-4.18394	1.61477	3.54393	-0.61953
5.336	0.23291	0.484671	4.72091	-1.16806	5.56287	3.37693	2.69425	1.63278	3.29132
6.003	0.994886	-0.16981	7.01963	-0.09145	3.66376	-2.98737	5.3888	1.42196	0.810119
6.67	0.934833	-0.18195	1.73368	-1.36999	4.34035	-2.14716	4.12987	0.698487	1.17316
7.337	-0.20191	4.04558	-5.31275	-2.73038	2.58064	-0.63089	4.91375	0.477439	1.56594
8.004	-0.30368	1.78283	1.3477	0.939736	4.09794	-0.40928	6.1246	0.790441	-0.59833
8.671	-0.93759	3.89285	8.32511	1.6643	4.14039	2.61428	3.63626	-2.51081	-0.05025
9.338	0.656053	5.19631	-0.51806	4.20677	3.03507	-0.25852	1.26555	-2.69888	0.84976
10.005	0.295487	2.73083	2.47296	5.12003	4.16292	-1.64128	-3.44016	-1.54601	-0.76806
10.672	-0.74731	1.61297	1.24451	-0.20179	0.971145	6.11893	1.49567	0.303812	1.98657
11.339	-0.73783	1.39984	-5.44869	0.396671	3.43151	5.46497	0.62354	0.606186	-0.09035
12.006	0.675694	-0.88197	-4.33119	-0.75763	-1.13545	4.60969	-0.14817	0.969074	-1.99664
12.673	1.82168	-3.34179	0.708401	-0.15687	-2.01845	4.21373	-3.61022	-0.58615	-0.26463
13.34	0.664236	-2.3796	-3.43896	-1.2243	-1.27552	1.45397	-2.75845	1.51413	-1.06272
14.007	1.00811	-1.64778	-2.76917	-2.15085	-1.04211	2.61438	-5.58682	1.45131	-1.39226
14.674	1.43337	-0.96389	2.83567	-1.71783	-1.69327	-1.03192	-1.64275	-0.58623	0.135434
15.341	-0.20447	-0.25412	2.51519	2.62974	-2.2703	-0.0223	-0.16746	1.49428	1.11006
16.008	0.093912	-2.14775	-0.93341	-1.42232	-3.38896	-1.58218	-4.64333	0.411026	0.18023
16.675	-0.10281	0.846627	-1.26273	1.0528	-3.78712	-2.28872	-7.52328	2.14103	0.134044
17.342	-0.65241	-1.07302	-8.1473	0.972817	-5.47199	-0.81365	-3.8812	-4.29914	-0.98768
18.009	0.466187	-1.55739	-2.07109	1.7251	-7.05239	-5.0838	-0.59672	-2.09742	-1.99816
18.676	-2.8204	-4.21743	-3.30325	-3.28521	-4.64622	-3.39809	2.78291	-3.5516	-2.6373
19.343	-2.76078	-2.68441	1.82531	-1.95794	-8.29604	-2.75294	-1.25781	-1.51666	-2.29418
20.01	-2.97616	-3.40083	2.61485	-2.32773	-10.3045	0.434529	-3.68831	-0.39631	-2.71178
20.677	-8.45773	-6.2388	2.27365	-7.00388	-7.60509	-3.99253	-8.46895	-6.40103	-6.40263
21.344	-10.1148	-6.56666	5.34886	-9.96048	-11.6056	-4.89046	-12.2103	-9.67534	-4.99571
22.011	-13.3331	-8.22538	4.14915	-8.80731	-12.0766	-9.4579	-11.3582	-9.43838	-7.86078
22.678	-8.53315	-4.36324	3.99964	-8.64289	-6.9875	-4.15815	-13.3182	-7.74889	-6.76793
23.345	-8.4675	-4.04103	4.31346	-5.92814	-11.2482	0.253304	-13.0419	-11.3686	-6.87967
24.012	-8.00371	-2.96367	4.86003	-5.20903	-9.99492	-2.72596	-1.6874	-13.1455	-5.92386
24.679	-6.42839	-3.11814	1.22291	-5.05099	-8.00201	-2.56676	-0.34976	-13.577	-2.84751
25.346	-6.44806	-4.81087	-0.50898	-2.12078	-10.9862	-3.18168	-4.46937	-11.5773	-3.175
26.013	-5.38054	-4.08058	-1.18208	-0.89197	-9.8364	2.5457	-0.02468	-12.5375	-2.38399
26.68	-7.3523	-4.17333	0.917024	-1.7817	-12.9232	0.209285	-2.91693	-10.4355	-5.17519
27.347	-6.64241	-3.41229	0.60709	-4.36539	-12.2794	-1.23728	-1.4933	-14.1078	-4.64404
28.014	-5.97426	-3.42609	2.35787	-3.03773	-11.5824	-3.39482	-9.00455	-13.3881	-3.22633
28.681	-5.57557	-4.25941	-0.88776	-5.07053	-11.3427	-3.51961	-6.46195	-12.3702	-5.90633
29.348	-5.81264	-3.43996	7.36567	-6.36428	-9.86548	4.12642	-6.6966	-13.4749	-5.00798
30.015	-7.15344	-2.92432	2.44361	-7.25732	-12.312	-0.92148	-7.24299	-13.032	-4.06419
30.682	-7.98492	-1.27768	6.02022	-3.6796	-10.9017	3.38371	-5.59924	-12.4132	-3.04317
31.349	-7.51364	-1.30764	-4.6643	-6.37131	-11.1907	3.06445	-10.1522	-13.9952	-5.71068
32.016	-6.56245	1.38234	-3.01776	-4.15829	-13.2743	-0.89529	-5.1797	-12.4954	-3.97857
32.683	-6.19716	4.20337	-3.66489	-1.43321	-9.25046	2.55486	-8.21647	-14.0314	-3.41573
33.35	-6.13408	3.85985	2.69352	1.92134	-9.84215	-3.32132	-7.17083	-12.0974	-3.17893
34.017	-7.18506	8.08796	2.78159	0.735869	-8.61593	-3.20352	-10.627	-15.1765	-0.9197
34.684	-8.44742	3.78822	1.42289	-0.13096	-9.14442	-3.38043	-6.58202	-10.9541	-2.8491
35.351	-5.93135	5.96464	-8.36101	-1.82348	-14.5708	-8.86954	-7.90969	-7.98348	-0.87621
36.018	-5.76074	2.44797	4.02389	-1.18804	-10.2548	-10.4398	-2.50835	-6.86909	-2.25282
36.685	-5.44357	1.56669	1.65375	-4.28961	-9.63757	-8.36168	-0.83405	-4.74857	-2.19528
37.352	-6.53616	1.34371	0.730521	-7.05945	-7.91914	-4.5698	2.00735	-2.71924	-2.62014
38.019	-7.41933	1.68192	1.51584	-6.96009	-6.7346	-10.1319	4.34604	-3.88457	-3.23328
38.686	-7.51748	-0.04201	-1.86125	-6.75205	-4.01418	-9.7124	1.43428	-4.47679	-3.8655
39.353	-7.96883	-0.49553	-6.375	-6.4675	-2.19097	-14.6655	6.02995	-7.60161	-1.13273
40.02	-8.94636	-0.57638	1.46525	-7.20789	-5.71347	-0.51561	9.59	-4.9535	-1.87396
40.687	-8.90224	-0.93718	1.15702	-7.29501	-8.22307	-8.14116	8.71183	-4.45639	-0.13321
41.354	-7.82908	0.259362	-2.24793	-7.33934	-6.60737	1.5001	11.2253	-3.03755	-1.62652
42.021	-10.0538	1.51913	0.2896	-5.27614	-8.28215	2.12834	2.68107	-1.11254	-0.49198
42.688	-8.21708	2.4244	-4.91459	-2.00587	-8.82783	-3.95086	2.20031	-0.71007	-0.21958
43.355	-6.71897	1.16932	-2.04939	2.95049	-7.22131	2.62703	6.77337	-0.36861	-2.22858
44.022	-9.29682	-0.09339	5.94482	-1.50035	-5.4314	5.0131	6.54461	-4.23641	-1.80715
44.689	-7.78982	-1.14566	-9.1821	-0.50389	-3.47559	1.35659	8.7754	-2.9144	-1.46305
45.356	-7.78329	-1.76252	2.42958	0.242442	-4.2177	-0.99961	11.4012	-3.24091	-0.9154
46.023	-6.84169	0.701155	-2.2101	-0.1636	-6.08595	-0.15359	11.6661	-3.00362	-1.81927
46.69	-6.63335	0.469326	1.61322	2.13889	-2.79575	0.936199	10.2621	1.64637	-5.13959
47.357	-8.49776	-2.33617	-3.44018	2.90081	-5.46069	5.05297	19.7888	1.72996	-1.94802
48.024	-7.83698	-0.38387	-2.38311	4.7086	-5.83056	3.63062	11.7178	3.97227	-0.93905
48.691	-8.03091	0.631114	-3.313	2.52392	-5.24191	3.18224	16.7998	2.07582	0.017947
49.358	-5.86846	0.525535	2.82817	2.18492	-5.99112	4.61731	12.591	0.650493	-1.43012
50.025	-6.74288	-0.21093	-2.98255	4.23961	-4.66948	-0.5153	9.29154	2.25266	-0.9705
50.692	-6.26729	-0.05102	2.82152	4.665	-3.35585	8.45126	7.87561	1.21938	2.95875
51.359	-8.70108	-1.39175	1.93235	10.7768	-2.59639	5.77812	5.30309	1.3438	0.295655
52.026	-6.83944	-1.47416	1.44311	7.38313	-4.95714	10.7352	8.19917	-0.1383	3.18501
52.693	-15.0711	-7.61633	12.7141	1.96517	-5.68612	0.322855	16.9499	-4.92814	1.9355
53.36	-14.3214	-7.58055	-0.01891	-1.55025	-6.7687	1.50192	-1.55336	-6.61156	-1.57396
54.027	-15.9948	-9.05771	-1.1653	-2.5944	-7.91702	-6.4682	0.356472	-6.23914	-4.75949
54.694	-12.3889	-6.73521	0.57981	-1.2542	-6.03989	-1.29578	-2.93871	-7.3332	-3.61114
55.361	-11.7398	-3.49623	-3.05233	-4.26966	-5.99583	-2.75534	-1.05654	-5.25025	-4.1183
56.028	-11.62	-3.06009	4.3798	-2.03293	-7.47076	1.24014	9.85857	-5.69316	-1.8627
56.695	-11.9281	-2.75209	-5.66712	-3.68157	-6.2986	-1.43136	10.4518	-6.46797	0.025002
57.362	-10.3728	-3.23272	-1.23654	-6.71427	-6.25511	-0.6756	13.0946	-3.85205	-3.54379
58.029	-11.8752	-3.00815	-10.1832	-5.83788	-6.67806	-1.75842	23.4221	-2.72514	-0.82651
58.696	-12.9179	-3.84082	3.26984	-3.25517	-7.20573	0.365152	24.3175	-2.17115	2.34106
59.363	-13.3294	-3.77827	0.883302	-2.77024	-5.21515	3.5225	17.4167	-5.40206	4.50369
60.03	-13.766	-0.8783	2.65578	-1.4313	-3.22434	4.40086	23.1281	-5.01587	5.1125
60.697	-13.1086	-1.85691	5.69556	0.451491	-6.5842	1.88328	17.3971	-5.39235	3.92747
61.364	-14.4342	-1.57996	4.53851	2.84709	-2.10337	-4.11029	11.9499	-5.66145	7.47297
62.031	-11.9974	-0.99017	6.08468	3.0266	-0.7217	-4.15265	16.5239	-3.78345	4.18395
62.698	-12.1658	-1.19754	1.23903	3.33722	-2.14196	-0.97486	15.4677	-1.19774	4.18486
63.365	-11.5721	-1.01875	1.29284	2.42977	-5.55343	0.337271	17.0454	0.701403	4.13616
64.032	-11.7749	-2.38408	-3.86988	-0.13784	-7.01131	2.36395	11.0361	-3.04435	5.64872
64.699	-11.137	-3.07079	-5.83864	0.75795	-4.48408	-1.76844	12.8408	-4.24688	5.18769
65.366	-12.0681	-4.71039	-4.71957	1.91224	-6.58322	-2.72376	18.487	-6.83516	4.18303
66.033	-11.5074	-3.79992	2.79807	1.45253	-8.20124	-5.86709	20.2041	-5.77886	6.30806
66.7	-11.0199	-6.47412	-3.46339	-0.4055	-3.77889	-6.42162	18.4694	-3.96907	4.47188
67.367	-10.216	-4.24934	-1.27356	-3.92256	-2.73156	-2.89779	20.1977	-5.906	2.23202
68.034	-12.2363	-2.78036	-6.30882	-0.03334	-5.79279	-7.40745	23.6651	-2.93799	3.35033
68.701	-12.2599	-0.45656	-1.89349	-2.47704	-6.55876	-7.95917	18.6315	-3.38542	3.79771
69.368	-12.022	-0.94053	-4.17885	-0.89824	-8.13944	-7.90789	16.6431	-1.72403	0.572032
70.035	-11.1451	0.709008	-4.70954	-0.24236	-7.89656	-4.6803	12.4885	-4.17016	0.136372
70.702	-10.3139	-0.43164	-5.17933	2.46964	-6.92379	-5.73251	13.024	-5.06679	0.699127
71.369	-9.32257	3.61382	-2.82946	5.54314	-8.22971	2.95919	21.5925	-8.56983	-3.6028
72.036	-8.73071	3.59408	0.060415	4.88013	-5.39383	0.803759	23.6575	-4.97776	-2.23701
72.703	-7.45683	2.38781	-7.6423	2.36248	-2.60809	2.79675	19.4224	-4.95277	-5.72838
73.37	-8.63182	2.90514	-0.98547	2.14228	-1.4907	0.202107	22.3401	-6.59024	-4.80437
74.037	-10.078	2.52412	-5.96503	0.360169	-2.54701	-3.09219	16.864	-3.75743	-4.72674
74.704	-8.28447	5.34103	-4.63673	-0.30436	-2.12385	-4.85504	9.29446	-4.28652	-4.76404
75.371	-8.83606	4.23049	-1.79287	-3.04747	-1.15577	-8.55434	9.86749	-2.40923	-2.62313
76.038	-9.16036	6.80478	-3.88408	-2.40802	-1.66739	-9.10295	19.95	0.161484	-5.88013
76.705	-9.03097	6.09082	-4.27831	-2.14948	-1.85798	-8.7851	26.2802	-2.58037	-7.46928
77.372	-8.86115	6.78291	-8.57523	-4.28896	-3.32337	-8.58632	29.89	-5.97923	-7.81723
78.039	-9.98285	4.38941	-4.09665	-0.71048	-0.17035	-9.11294	24.2366	-5.29057	-6.04548
78.706	-7.9588	7.26221	0.656897	3.31829	-0.91637	-12.1788	24.2537	-4.84555	-8.36471
79.373	-8.06566	4.61872	1.36188	2.13205	-1.65866	-12.9992	28.0372	-4.89096	-9.56183
80.04	-9.21837	2.34806	-8.33001	2.73886	1.12877	-11.9641	34.582	-3.93221	-7.46755
80.707	-8.52136	3.85866	-0.87429	1.50244	0.256438	-12.4321	30.1715	-2.60686	-8.73739
81.374	-10.0306	3.13868	-12.1205	-0.08371	2.62074	-17.3384	39.4674	-3.10714	-7.51464
82.041	-8.15088	3.19428	-5.03716	-1.40906	2.86479	-14.8156	39.7206	-0.49616	-9.42045
82.708	-10.0258	4.95251	-6.70407	0.164811	3.84709	-17.5146	43.2308	-3.97988	-8.92032
83.375	-8.66733	5.54845	-10.0141	1.30907	9.81373	-18.4641	41.3901	-1.78325	-12.8454

## Sheet: 30s stim
GCaMP responses of dilp2 to optogenetic activation of BiT
time (s)	fly1	fly2	fly3	fly4	fly5	fly6	fly7	fly8	fly9
0.667	0.286396	-7.31064	2.11024	-11.2479	-1.57203	-3.09368	1.06174	1.99286	-16.3106
1.334	2.01734	-3.15596	3.07303	-7.61112	0.867527	1.37339	-2.51413	-0.5034	-11.4313
2.001	2.88114	-6.04436	-8.05903	-8.43604	-1.29578	-5.9799	-2.24206	0.946086	-13.4948
2.668	3.77694	-6.30961	-4.70757	-8.26337	1.9187	-3.33487	-1.84543	-2.85288	-12.0485
3.335	2.98205	-6.61812	-5.24388	-7.81447	8.15316	3.6138	0.830274	1.17875	-13.115
4.002	0.883606	-4.76252	0.050849	-8.39596	-0.02961	1.86169	-3.70808	0.520923	-14.2449
4.669	3.65434	-3.6805	-3.18015	-8.19436	6.70511	4.13756	1.34966	0.235072	-11.8887
5.336	3.83402	-1.66136	-9.07418	-11.9322	-1.36987	-3.43652	-1.74717	5.03883	-10.7613
6.003	3.45005	-1.34817	-2.21847	-9.53422	-8.47332	8.92096	-1.09554	2.5709	-8.6655
6.67	3.27794	0.193366	-1.27909	-6.77515	4.3885	8.41444	1.41726	3.04858	-6.36557
7.337	1.47162	-0.43835	3.57837	-5.21396	1.81556	4.77478	-0.03508	-1.05586	-7.86151
8.004	0.921697	0.341504	2.96128	-5.09049	-1.48652	3.97799	-1.56049	-0.29596	-3.31931
8.671	1.38742	1.30931	3.05276	-5.2116	-2.72484	9.85614	0.189869	2.10866	-2.85863
9.338	1.83077	0.058158	-4.36964	-3.16624	-4.10759	-2.41999	-3.79752	-0.76766	2.75414
10.005	0.870486	1.87973	-4.16713	0.873137	0.474153	-2.38961	-11.1755	-0.11872	-0.72794
10.672	1.56973	0.743975	4.92814	0.507011	3.93063	-3.53641	-9.39432	-0.99941	1.96135
11.339	-0.14481	2.42901	2.9911	3.7426	-1.12649	2.07516	-7.33373	0.435038	2.23349
12.006	1.03049	2.22292	1.75706	6.91662	-5.23211	2.26501	-3.15417	0.355715	4.48602
12.673	-0.41324	4.2387	4.91703	6.24778	-0.4052	-10.0693	2.60985	1.38093	7.11176
13.34	-1.06807	1.80401	2.61616	5.61083	0.379042	0.594478	1.59782	1.61928	6.69794
14.007	1.42198	3.39546	14.791	6.39341	-0.88893	1.1175	8.15123	2.90225	5.64782
14.674	-0.47901	2.85846	-1.6772	7.34288	1.78451	-4.96166	8.06439	-4.41009	3.43681
15.341	-1.79991	2.05805	-2.95945	5.44836	4.70969	-3.04235	7.46881	-3.24156	5.75556
16.008	-1.19758	0.461944	-10.448	5.11676	-1.46022	-9.47503	6.02151	-2.12859	9.00786
16.675	-4.76758	-4.2611	-1.68883	2.79136	0.316826	-4.299	1.26329	-1.9152	2.57617
17.342	-4.01964	-2.47446	0.491268	4.5218	1.9459	-6.26478	0.408417	-2.88257	7.50833
18.009	-6.07311	-1.87372	0.595452	4.73997	4.19568	2.9043	1.10955	-0.56503	2.79171
18.676	-5.64121	-3.49443	-1.66829	3.26163	-3.3409	-1.0054	3.34994	-1.83556	4.72444
19.343	-6.25236	-4.62208	-0.22203	2.96248	4.30077	-2.08058	5.04114	-0.33494	3.85931
20.01	-4.23525	-4.66334	-18.5663	3.32779	-0.55365	-0.11614	3.83166	-0.46914	3.41838
20.677	-9.77058	-13.2954	-9.2484	-4.63543	-7.66631	-2.40512	-0.19405	-11.1958	4.57022
21.344	-9.89316	-10.8415	-10.5858	-5.14135	1.91971	-13.1184	-5.82494	-10.0581	1.04745
22.011	-5.45218	-9.1294	-4.15076	-2.80434	-0.76295	-5.47837	-2.99719	-9.95659	0.149751
22.678	-12.6214	-16.1822	-10.3219	-10.681	-2.30187	-13.1711	-6.14754	-16.304	-3.37652
23.345	-10.2222	-12.2739	-13.3536	-10.961	4.87467	-3.71994	-10.2049	-14.4853	-4.73316
24.012	-8.97493	-11.5694	-15.9597	-6.95025	13.8931	-3.23358	-13.4051	-12.7702	-4.73549
24.679	-13.3561	-15.2716	-8.59323	-16.2812	0.93426	-5.86524	-12.4306	-18.3295	-6.71142
25.346	-15.4152	-8.50381	-10.7033	-16.1416	0.931272	-1.05686	-20.7863	-15.8678	-10.499
26.013	-11.5366	-6.67641	-9.17645	-14.1484	3.17577	-7.61344	-18.726	-18.5328	-9.92085
26.68	-17.5489	-8.6924	-13.8279	-18.6423	-2.20341	-15.5699	-22.7273	-23.7748	-8.45189
27.347	-16.9468	-10.0872	-3.6504	-16.6467	-1.65489	-9.01752	-27.1687	-22.363	-6.64204
28.014	-13.9302	-6.32518	-5.30948	-12.2017	-3.33871	1.41833	-29.9331	-20.9864	-10.2603
28.681	-17.8214	-13.0494	-9.83195	-15.6969	-2.90908	-10.1619	-26.101	-25.6835	-7.65062
29.348	-16.1363	-10.0763	-0.41059	-16.7848	-9.03163	-2.42678	-30.6291	-26.5164	-9.55138
30.015	-14.5516	-5.95374	1.39329	-15.0044	-5.20489	1.58917	-30.1504	-21.7553	-9.78888
30.682	-22.6434	-13.171	-2.50337	-22.419	-10.1888	-9.12063	-31.4317	-28.1806	-12.3383
31.349	-21.5885	-8.26272	-7.35776	-17.096	-6.03975	-2.21508	-30.5815	-31.1605	-8.21201
32.016	-21.2298	-7.68505	-8.63243	-15.3926	0.166548	-1.21507	-33.133	-26.1864	-10.3348
32.683	-21.5546	-11.0776	-5.07429	-21.7827	3.13332	-8.9374	-33.9697	-29.0656	-8.37505
33.35	-22.5457	-7.6957	6.06508	-19.9689	0.236346	-0.58084	-37.6645	-30.2233	-11.3191
34.017	-21.1188	-7.56634	5.88964	-18.9878	-2.13885	0.313328	-36.9901	-26.735	-11.6451
34.684	-25.5977	-13.7832	-3.03583	-22.9592	-4.4466	-2.96254	-37.3924	-31.8191	-10.6041
35.351	-24.5497	-11.2355	-8.67762	-21.1072	3.6195	-3.1999	-41.2737	-27.8119	-15.4846
36.018	-20.1832	-8.02744	-3.71396	-16.2895	4.23277	-0.35471	-39.9953	-31.8905	-13.8831
36.685	-27.2912	-9.66387	-4.08922	-22.3081	-0.95488	1.70954	-41.3988	-35.6853	-10.2443
37.352	-26.264	-9.06914	-5.6599	-20.5512	7.35985	-0.46973	-38.9981	-31.3522	-9.81171
38.019	-21.6119	-4.32636	-2.36536	-15.5972	9.43408	7.71432	-40.3302	-31.1439	-8.8647
38.686	-25.7799	-9.80041	-1.52542	-20.4112	8.09056	-2.47927	-43.3208	-37.2341	-12.953
39.353	-26.0971	-8.43593	-1.7379	-20.5543	8.43463	-1.17708	-41.637	-34.5581	-12.3725
40.02	-23.7711	-4.2627	-1.30939	-16.4767	16.9863	13.1745	-41.0445	-32.7044	-13.7921
40.687	-31.3054	-10.6699	-0.57956	-23.1705	6.51061	-0.99606	-39.3304	-37.181	-9.86881
41.354	-27.6085	-7.63646	-5.89595	-21.7975	9.62613	8.19208	-41.1163	-35.5363	-16.52
42.021	-22.075	-5.54614	-11.7182	-21.1234	8.96443	4.92779	-43.1243	-33.5914	-13.7265
42.688	-28.231	-10.8995	-8.1245	-24.507	9.08585	-0.47399	-46.0319	-38.1121	-13.8449
43.355	-27.5516	-7.60283	-1.95304	-22.8086	9.74479	-3.32443	-44.9762	-34.182	-15.85
44.022	-22.7718	-8.00373	-1.43036	-20.6418	11.0635	4.77788	-42.2409	-33.7578	-16.2095
44.689	-26.9095	-12.5591	-2.89464	-26.9261	12.04	-9.45589	-46.1655	-40.5051	-13.547
45.356	-25.3447	-9.02837	2.29915	-25.2851	5.31282	2.31046	-43.4805	-36.8721	-16.2874
46.023	-23.1781	-8.2181	-2.48816	-23.871	6.11307	1.74407	-42.9807	-36.3821	-13.3909
46.69	-28.6795	-14.1676	0.542375	-27.3645	8.16166	-5.28246	-45.2298	-38.0661	-9.40853
47.357	-27.8111	-13.2619	-3.47785	-26.5943	15.537	2.18396	-45.5059	-37.7388	-12.8084
48.024	-23.1496	-11.5955	-4.92751	-24.0535	9.38749	-1.11764	-46.6842	-35.3001	-10.8149
48.691	-26.6493	-18.2247	-3.27718	-24.7008	3.68232	1.3355	-44.2522	-39.9376	-14.8043
49.358	-24.7454	-15.028	0.732655	-21.8225	3.73617	-6.49637	-45.5892	-38.3053	-15.453
50.025	-22.9016	-11.5243	-5.84227	-20.9938	5.16545	4.68765	-42.6665	-33.9321	-13.1609
50.692	-22.0338	-10.1121	-7.88308	-22.1309	6.98159	-3.26779	-44.4725	-35.0594	-8.98985
51.359	-19.1942	-12.1577	-3.95906	-18.2175	5.95846	-1.70551	-44.7577	-35.123	-6.30036
52.026	-19.0173	-13.5454	4.88907	-18.3149	3.47052	4.88971	-37.891	-29.5169	-3.8008
52.693	-17.7129	-14.4937	7.38261	-15.6586	4.41357	8.32459	-37.2885	-26.0358	-2.29021
53.36	-16.8644	-11.0174	5.01626	-15.526	8.52827	3.52678	-36.2991	-22.1732	2.17168
54.027	-15.7775	-10.8425	1.59118	-13.9389	10.8432	-1.17531	-29.0911	-18.8917	3.20106
54.694	-17.2809	-10.4344	4.19573	-11.958	9.6786	0.844246	-30.5005	-14.7819	5.72787
55.361	-13.8767	-8.65148	7.61146	-6.733	12.2166	5.29797	-27.9251	-12.7223	4.84687
56.028	-15.0587	-8.04217	-0.56882	-6.0489	14.798	4.60347	-25.7767	-9.56359	5.21082
56.695	-17.3523	-9.64005	1.4018	-3.70316	20.4104	-0.07712	-23.4446	-7.16344	5.45996
57.362	-15.2696	-8.36118	-3.14726	-9.10752	21.3404	-5.16873	-25.3979	-3.51276	3.09093
58.029	-12.161	-9.86174	-10.1822	-8.0019	27.0916	1.45718	-26.0535	-1.12098	6.6686
58.696	-13.3714	-9.47133	-4.37763	-8.58391	22.1663	3.34371	-23.1185	0.077083	7.16663
59.363	-13.7221	-8.55276	-5.5027	-10.4571	19.9072	8.87416	-18.7875	2.29411	3.11718
60.03	-13.7855	-9.87029	-6.44046	-13.9702	20.1947	2.52843	-18.6003	5.10333	5.67895
60.697	-10.3586	-12.0812	-14.1416	-12.1518	23.7307	7.81759	-18.4922	3.50632	6.75359
61.364	-9.60309	-10.7517	-18.6318	-10.643	21.6651	-0.8428	-15.5669	4.94462	7.37201
62.031	-11.4073	-13.3407	-14.2332	-11.3954	25.3366	-2.90264	-18.0544	2.13174	6.83881
62.698	-11.3854	-14.9741	-5.61841	-11.9908	17.9517	2.23847	-16.7025	-2.97376	5.19013
63.365	-10.7956	-13.2664	-12.5371	-9.64132	27.3268	9.16959	-16.757	2.34825	7.75274
64.032	-10.2293	-16.4451	-14.1327	-9.53872	25.3629	1.60037	-18.4562	1.78439	7.14694
64.699	-10.6162	-13.6878	-11.159	-6.60741	32.1958	4.49362	-16.8776	6.13133	6.37831
65.366	-10.318	-17.426	-7.75468	-3.79679	27.6909	1.02624	-23.6313	4.84387	5.32667
66.033	-10.6761	-17.0584	-11.3146	-2.17396	30.9682	-0.13836	-23.3879	4.00414	4.16947
66.7	-11.0907	-16.6385	-1.68221	-4.51748	29.1095	-4.14985	-21.2779	4.12653	-2.22918
67.367	-11.3288	-16.7457	-2.93213	-3.09686	35.3419	-2.12582	-21.7898	2.63546	1.28978
68.034	-11.5302	-17.8277	-2.93017	-6.9254	29.2749	-10.5957	-19.7422	1.36295	1.0432
68.701	-10.3075	-15.2308	8.42444	-5.96692	43.2177	-2.25235	-18.7175	2.17535	-0.12105
69.368	-9.99638	-16.1454	4.56634	-8.34175	37.1225	-0.03086	-22.7192	1.67711	-1.41604
70.035	-9.88757	-17.1336	10.2922	-10.0286	45.222	-6.01208	-22.7186	1.14434	0.056224
70.702	-11.4364	-17.9073	14.1378	-10.9672	39.5614	-0.60504	-23.2758	1.5688	-0.0683
71.369	-12.2317	-19.3748	-5.80363	-9.75579	40.4076	-5.96574	-25.3758	-0.07407	1.94904
72.036	-14.2022	-16.7258	10.3714	-10.8947	46.8114	-1.61609	-27.2241	-2.41929	-1.11535
72.703	-13.6365	-18.1394	6.58388	-13.1975	35.9688	-12.4759	-22.9861	1.77752	0.243679
73.37	-13.6688	-18.3082	4.12387	-12.0002	37.6795	-13.5563	-27.964	0.218035	0.518176
74.037	-13.7262	-17.0868	14.753	-13.2396	33.6767	-4.40003	-30.2747	2.69347	-2.05643
74.704	-14.4281	-15.2494	-2.4282	-14.1295	38.9713	-12.0373	-29.4259	4.24517	-2.62106
75.371	-15.1064	-18.1484	3.79011	-12.6291	33.6422	-6.63764	-27.0649	0.459152	-2.02937
76.038	-17.9957	-14.8648	1.5776	-13.9859	33.6735	-3.10552	-30.4844	4.87048	-2.3174
76.705	-15.9497	-13.1699	-2.51737	-14.3383	31.2884	-0.78397	-29.6342	5.3431	0.14949
77.372	-16.3892	-12.9279	-3.07361	-16.6636	30.6213	-3.93614	-31.6596	2.01466	-1.78239
78.039	-13.0534	-10.8685	-9.1465	-16.7212	22.6663	-6.9244	-33.2315	-2.70679	-1.7758
78.706	-14.2121	-12.2716	-9.59405	-16.9438	25.4851	-2.28944	-32.8678	-0.10497	-2.48431
79.373	-13.4569	-12.5241	-14.7466	-17.7751	25.7956	-6.7976	-34.1296	-3.35656	-5.36627
80.04	-14.5687	-13.5855	-17.0348	-19.938	23.9684	-5.58015	-34.8953	0.717814	-5.11152
80.707	-12.4581	-13.4331	-13.8309	-17.5996	21.1108	-5.21758	-34.6039	-0.49122	-5.98078
81.374	-11.9431	-14.6957	-18.7823	-20.1614	25.2839	-4.52737	-36.8193	-2.01454	-4.51373
82.041	-15.3388	-11.1989	-16.7694	-21.1474	31.5155	-9.96234	-37.7861	-0.14549	-6.03522
82.708	-13.3002	-10.9314	-15.7884	-18.0093	27.0415	-9.07897	-35.1203	1.42378	-7.66275
83.375	-12.4612	-12.9724	-14.1767	-19.1423	26.3473	-6.54173	-38.2611	0.416968	-6.90751
84.042	-13.7533	-14.8352	-13.3879	-22.5132	25.2437	-6.9849	-37.8823	-5.94722	-7.34787
84.709	-14.9636	-14.7262	-8.91256	-18.7028	20.7435	-2.67931	-39.1742	-1.26524	-11.484
85.376	-12.0791	-13.9413	-8.82778	-22.1383	19.3201	-11.6778	-36.1018	-4.79807	-9.20243
86.043	-13.8262	-12.5212	-3.15459	-19.8295	23.8788	-12.0508	-32.3008	-2.85141	-9.35066
86.71	-11.8655	-11.9774	-5.93386	-20.7897	25.4015	-7.96686	-32.1979	-5.5186	-11.5715
87.377	-12.6115	-11.1373	-0.81794	-20.14	27.9711	-13.8361	-30.1092	-7.84836	-6.53679
88.044	-10.4134	-7.70847	-4.06945	-23.8645	25.6223	-11.7764	-31.0748	-4.70178	-10.3216
88.711	-10.4111	-9.73281	-8.21219	-22.2884	27.31	-7.33914	-24.368	-10.4493	-8.56644
89.378	-10.4944	-12.726	-5.28528	-21.1161	35.1664	-3.41008	-28.3493	-9.29802	-8.83967
90.045	-12.6287	-12.4123	1.40337	-21.0317	33.2936	-7.48689	-26.9528	-8.22967	-9.15246
90.712	-13.933	-13.454	-0.02438	-23.4367	36.7433	-10.4293	-26.1686	-7.63223	-7.70143
91.379	-12.4006	-9.97994	0.462475	-20.1147	39.3452	-5.67813	-30.0547	-12.3362	-11.7826
92.046	-11.7681	-12.2249	8.91957	-20.4159	38.7419	-9.99297	-30.9962	-6.81351	-11.1902
92.713	-11.9119	-12.1715	5.92346	-24.9028	41.6986	-7.55077	-30.0164	-9.83988	-15.3072
93.38	-11.8408	-11.6213	1.94453	-23.2509	35.5213	-7.5862	-29.3735	-6.41303	-15.9201
94.047	-13.1635	-11.9544	3.04243	-24.1843	37.7311	-6.54911	-30.2788	-4.74316	-13.7973
94.714	-10.3119	-13.3613	0.944564	-24.5255	38.7034	-5.23777	-30.8179	-1.37424	-17.7195
95.381	-12.1238	-13.3314	1.8721	-24.9432	46.3191	-2.76046	-27.2207	-4.84969	-17.8468
96.048	-10.8512	-12.2273	-0.8802	-20.5313	35.6068	-8.84196	-29.419	-3.86828	-19.2379
96.715	-14.4634	-9.77293	1.60101	-23.6098	39.319	-13.027	-32.239	-4.65783	-19.8023
97.382	-12.9534	-9.95623	4.85037	-23.5099	42.5416	-6.36498	-31.8035	-4.32228	-21.6659
98.049	-12.1992	-10.1698	-1.89571	-22.9352	56.1701	-14.8924	-31.3973	-9.14701	-21.2949
98.716	-13.2427	-11.2787	0.835724	-23.9284	51.9918	-13.4819	-32.0671	-6.52649	-16.9562
99.383	-12.8285	-11.2686	7.96626	-22.0515	49.5132	-15.9802	-30.0383	-5.67234	-17.4796
100.05	-13.3926	-11.6252	4.78307	-24.1255	45.3731	-13.9022	-28.0941	-8.03982	-18.2129
100.717	-13.1677	-13.6045	5.336	-24.1424	49.2078	-9.94615	-30.0454	-1.04597	-18.8971
101.384	-13.8751	-15.0514	6.90508	-20.1612	47.3826	-8.08721	-28.1552	-3.468	-16.1408
102.051	-12.0938	-13.9519	-1.11273	-21.4581	37.9397	-7.9724	-29.2118	-3.96174	-19.2805
102.718	-14.2558	-13.3362	4.64522	-20.2924	39.7288	-11.3858	-29.7896	-0.09146	-19.3748
103.385	-14.6779	-13.5981	6.58028	-22.584	35.4393	-14.2859	-29.3021	-1.83863	-19.8281
104.052	-13.554	-16.1463	11.446	-23.6343	37.833	-18.7594	-32.7221	-5.09606	-16.5688
104.719	-11.6062	-16.0157	2.69395	-21.2429	32.0857	-11.1226	-32.9153	-4.13825	-17.5631
105.386	-12.3108	-12.6965	5.2351	-21.8939	37.2819	-13.4298	-30.8894	-5.91231	-16.7467
106.053	-11.8034	-17.8473	5.49775	-24.3947	29.0527	-12.3373	-28.7117	-7.07349	-17.5451
106.72	-11.8018	-15.3561	2.11852	-24.0901	34.0031	-15.3925	-32.3643	-7.73473	-15.7652
107.387	-11.2698	-16.9524	10.2153	-22.7764	32.1267	-21.1761	-31.8444	-7.36937	-15.8099
108.054	-11.3279	-16.4103	9.92922	-23.0406	29.0293	-19.1317	-29.3456	-11.7643	-14.3106
108.721	-10.5421	-16.2449	6.38701	-24.8	37.1003	-17.4	-30.4186	-10.2862	-16.2904
109.388	-9.75414	-15.1026	9.06286	-28.2198	33.2528	-20.346	-29.0129	-14.547	-16.9059
110.055	-10.1099	-16.76	3.04996	-26.8683	34.9898	-19.7775	-29.4783	-14.8159	-13.0715

## Sheet: 2s stim_control
GCaMP responses of dilp2 to LED presentation
time (s)	fly1	fly2	fly3	fly4	fly5	fly6	fly7	fly8	fly9
0.667	-21.1967	2.77358	-16.3888	-7.77066	16.159	13.7567	-3.31714	0.593871	-8.44223
1.334	-5.04343	2.49268	-2.40055	-5.45997	4.49435	12.7458	1.59314	9.05748	12.5418
2.001	-2.94712	1.25891	-2.32721	-2.82101	2.65711	11.6012	-0.86392	12.4862	5.38099
2.668	-4.20175	4.25313	-1.95625	-1.1128	8.50088	4.55881	3.71386	-1.67544	6.73357
3.335	-1.36878	2.26886	-6.74847	-0.3022	3.85061	4.2688	2.99543	-4.46986	8.27398
4.002	-2.08154	-0.99011	-1.9805	0.716323	3.62078	2.24698	0.568993	-8.62309	-1.66143
4.669	2.18928	1.67378	-2.76788	2.04046	5.18864	-1.65752	-1.22724	-3.05933	6.71415
5.336	-1.05758	2.9314	1.06046	3.56585	0.47348	2.18391	-1.81521	-5.50005	1.7448
6.003	3.84431	1.73747	-1.56306	3.25165	-1.84967	0.160864	1.39201	-5.71021	0.585515
6.67	3.324	2.16628	-4.45839	2.0418	0.037673	1.36751	-0.2709	5.21083	1.4339
7.337	-0.01746	3.49828	-2.51627	3.77205	-0.08133	-4.21794	2.0022	21.8095	-1.86526
8.004	-1.92469	3.37239	-6.17533	2.70476	-4.19947	2.5101	3.47105	20.802	-0.56446
8.671	-0.39542	0.320436	-6.45167	2.20518	3.22305	1.53639	2.55445	16.178	-4.18971
9.338	-3.89541	2.50387	-5.7836	1.58745	-5.12467	-1.04129	2.14715	11.3126	-4.22131
10.005	-5.94138	0.261751	-2.64251	2.54668	-1.83243	0.508646	1.60065	11.1686	-3.48542
10.672	-4.06946	0.412215	-4.00161	4.41049	2.776	-4.06253	3.87159	3.87117	5.59016
11.339	-1.05744	-2.72763	-5.10968	2.31038	2.24892	1.56164	2.63083	2.2747	1.87506
12.006	-4.81016	-3.78089	-2.46067	0.088766	-5.59925	-0.101	-1.51593	-9.68981	-4.17097
12.673	1.2974	-0.82915	-2.35252	0.076923	5.52955	-4.50089	0.392958	-7.91669	-0.20025
13.34	3.34565	-1.42865	0.727883	-0.01642	3.6538	3.54672	-1.44425	5.79891	-0.2476
14.007	6.34751	-1.13078	0.207257	1.01613	6.67262	-2.84716	1.55983	-10.1112	-0.31038
14.674	3.94638	-1.52953	4.94354	-2.16648	3.88588	-0.23817	0.019804	-8.88204	5.28444
15.341	6.32149	-2.22357	6.85643	-3.16943	-4.88636	-7.90038	-0.98104	-14.3371	-0.65265
16.008	1.46105	-0.75152	6.57844	-5.73627	1.56292	-0.88367	-3.80514	-5.69404	2.04225
16.675	-3.72733	-0.19483	7.45716	-5.45746	-4.27363	5.40377	-3.75622	3.04093	-1.64874
17.342	-3.41591	-2.80361	2.55934	-6.57235	-2.79311	2.86607	-3.17351	0.833572	-1.06264
18.009	-2.37094	-2.03383	8.00326	-5.03876	-7.59606	0.729512	-2.733	-6.59795	-2.21705
18.676	2.68766	1.54625	9.86993	-4.17772	-0.63733	2.82842	-1.48906	-16.1795	1.22758
19.343	-1.2717	-0.68694	7.79779	-6.4634	-7.20999	1.26529	-1.70608	-4.68351	4.46695
20.01	2.28552	0.772111	5.49672	-6.36269	-3.08946	-0.0306	-3.19629	-20.8205	-2.6287
20.677	4.57787	-0.18745	2.07401	-8.34685	-12.981	-11.3097	-6.69226	-31.9538	1.46889
21.344	14.171	5.06772	7.05746	-7.81873	-0.84859	-4.82965	-7.43001	1.89496	8.2722
22.011	21.8983	16.0326	1.89767	-12.627	-3.51328	-3.04988	-6.85747	5.52893	14.0673
22.678	25.9724	21.6165	10.0429	-12.6857	5.00738	1.62059	-1.85288	36.5951	12.5206
23.345	29.6949	21.8832	7.16135	-13.9725	2.85201	-0.80584	-0.20076	18.6675	4.72676
24.012	30.0209	22.5358	6.93282	-13.2532	-1.34778	3.35612	-1.90542	20.2596	4.0277
24.679	21.8925	24.6761	12.2965	-13.8299	2.28375	2.48517	-1.52508	6.57745	2.71602
25.346	17.8001	22.3741	10.7152	-16.4208	0.322584	-6.43191	-1.52445	7.48719	3.03475
26.013	18.6932	20.5361	13.1044	-14.8852	-5.71117	0.792288	-3.0774	23.8766	-1.51115
26.68	10.9025	20.5414	9.07136	-16.5831	0.242438	-2.03298	-0.27986	24.1341	-5.66173
27.347	10.5104	16.6386	8.78884	-18.4976	-8.476	1.24242	-6.55804	28.0636	0.02931
28.014	8.58357	15.2988	5.49812	-19.5864	-10.164	-1.89201	-3.66055	23.7663	-7.50379
28.681	11.4088	16.0721	3.06668	-23.5693	-7.13445	1.34078	-4.45194	15.0002	-3.96032
29.348	11.3152	10.9038	7.31813	-21.9898	-4.43939	0.715945	-5.81222	6.91008	-4.29685
30.015	12.9482	12.1154	7.61394	-24.2021	-0.95525	-2.46435	-6.37276	-4.59101	-10.4625
30.682	11.8636	11.1177	11.1371	-24.3858	-5.75243	-2.81653	-7.47602	-0.45904	-9.56855
31.349	13.5565	11.0702	9.24164	-24.9281	-6.85786	-3.60032	-5.92311	4.21203	-19.3169
32.016	13.3904	8.69055	7.0345	-25.1808	-6.97914	-2.08182	-5.12387	-3.61979	-17.488
32.683	21.1044	10.797	10.6007	-26.2698	-2.21157	-2.03281	-4.50566	-2.59297	-18.3476
33.35	20.5421	7.91142	8.28987	-26.6455	-12.8112	-4.86134	-2.79471	-12.2156	-20.7008
34.017	25.1212	7.33934	5.50144	-28.0431	-7.75897	-1.74853	-4.30389	21.3423	-18.5262
34.684	25.3863	9.04175	3.76422	-30.5625	-8.39583	-5.29786	-1.25478	18.4767	-22.4896
35.351	28.5283	5.46615	2.21207	-29.0296	-5.65233	-7.27878	-0.30449	8.67115	-18.3042
36.018	33.4121	5.24842	-0.95477	-29.3249	-14.4512	-7.6005	1.06654	-2.80362	-21.7112
36.685	30.2666	6.53745	-3.57687	-29.0663	-11.3025	-4.38585	1.06391	-4.76862	-24.4202
37.352	30.8216	4.80598	-1.4625	-31.0333	-7.42359	-7.01657	-4.77989	-5.293	-26.4358
38.019	30.8933	6.6853	-4.90644	-30.7779	-16.362	-10.4343	-1.252	-4.57749	-26.3921
38.686	31.2858	4.58723	1.97139	-30.3984	-12.6484	-7.91797	-3.96215	-6.29195	-23.807
39.353	32.2206	6.0401	4.35517	-33.0272	-17.8459	-8.14651	0.226015	-14.4192	-28.666
40.02	26.7519	4.99518	6.62848	-31.8221	-12.6575	-8.59289	2.22255	-4.39774	-28.417
40.687	30.8766	7.20418	10.918	-31.2375	-5.72903	-15.5668	2.90877	-4.18996	-30.253
41.354	26.3716	6.47032	8.45492	-32.0343	-9.71777	-10.8062	1.34512	-0.7892	-29.8123
42.021	22.2757	4.0245	8.57611	-32.7563	-13.583	-9.03119	-2.35974	-15.5802	-31.413
42.688	23.4097	6.67058	1.38794	-34.8795	-10.8516	-9.73804	-0.57696	-20.4202	-35.3357
43.355	19.8208	3.90183	2.67504	-34.5508	-14.596	-9.28073	-1.81192	-7.40002	-33.7273
44.022	21.5228	5.53033	-0.87665	-35.7872	-13.2772	-12.7071	-1.50826	-12.4933	-30.3115
44.689	23.8208	2.71333	-0.83392	-35.7901	-12.5445	-5.8626	-2.79891	-22.4292	-28.3668
45.356	25.6334	2.19537	-1.66648	-36.789	-14.7628	-14.9925	-4.51426	-13.2987	-30.1495
46.023	29.9374	0.574655	0.881252	-37.227	-13.492	-13.818	-4.42262	-25.9705	-29.3363
46.69	31.4309	-2.05658	1.27142	-36.5037	-20.1726	-10.9262	-5.57868	-22.825	-23.7386
47.357	30.4618	0.478894	0.5319	-38.9777	-15.8903	-11.3967	-3.88263	-20.2206	-28.6514
48.024	27.8864	-1.90913	0.286123	-37.5229	-18.906	-11.4368	-6.10087	-18.0674	-28.995
48.691	28.2708	-0.51335	-1.27614	-38.4728	-19.9446	-9.53169	-6.17908	-25.4145	-30.7092
49.358	32.1392	-0.6197	-0.6542	-38.1417	-22.7477	-11.585	-4.66314	-6.13723	-31.8698
50.025	28.7053	-0.88452	2.2953	-38.2622	-13.0572	-12.5617	-6.5826	5.06653	-32.7126
50.692	29.3968	-2.11131	3.7524	-39.1227	-21.3848	-8.26236	-4.24822	1.95671	-37.9786
51.359	27.0012	-1.43323	8.29882	-39.5308	-23.4123	-14.4199	-7.05317	-9.43461	-37.0918
52.026	27.6973	-3.01714	5.04481	-39.5309	-16.5362	-12.2524	-8.23045	-9.96606	-36.9771
52.693	25.5824	-3.04729	2.97701	-42.5566	-23.6029	-17.1388	-11.4109	-17.1777	-36.4364
53.36	30.5525	3.00642	3.00727	-42.3134	-16.1287	-18.6428	-9.69824	-0.72948	-27.9577
54.027	42.7096	10.0654	3.11112	-40.6999	-15.7117	-16.8068	-10.924	16.4741	-28.2216
54.694	42.0463	10.8192	10.706	-38.9349	-14.2171	-10.0628	-6.53286	32.5504	-19.1945
55.361	40.7077	13.3386	12.0668	-37.7243	-19.8204	-13.7474	-4.39326	24.6218	-22.2406
56.028	35.9996	17.8576	16.1101	-39.9275	-21.672	-16.5758	-7.97582	17.0159	-24.4295
56.695	33.7091	20.862	14.1057	-42.1619	-17.197	-13.7627	-3.69157	11.2078	-27.6185
57.362	32.7204	21.6553	14.5608	-43.3019	-16.4259	-12.345	-6.53233	5.4207	-26.1313
58.029	26.1892	22.0706	13.5216	-41.1681	-15.7716	-14.6521	-8.4735	-0.82422	-19.4987
58.696	24.6658	19.1116	12.5726	-41.7788	-21.3025	-8.05139	-6.00188	-1.16093	-25.4646
59.363	21.2253	18.335	16.8182	-43.2297	-27.016	-12.0009	-6.64082	0.248174	-25.2045
60.03	17.7146	17.3707	15.7469	-43.4916	-23.0804	-11.2806	-7.91015	-5.80783	-30.4936
60.697	23.304	14.4791	16.7241	-43.826	-21.5269	-15.5308	-10.602	-12.6437	-25.4005
61.364	19.5508	13.0885	10.7804	-44.3288	-25.2044	-21.0078	-8.94145	-11.2173	-30.6375
62.031	18.1466	11.7454	9.85005	-43.3771	-21.2446	-13.1595	-10.2707	-17.0374	-34.7043
62.698	11.0145	11.8332	12.884	-43.2586	-23.2502	-8.38212	-9.96127	-13.0414	-32.353
63.365	13.8274	8.63481	12.8571	-43.4466	-26.1892	-7.13478	-8.82491	-22.6977	-31.2066
64.032	8.80986	9.38798	16.7279	-44.3386	-20.304	-13.7928	-10.4863	-19.846	-28.6137
64.699	9.73645	7.11413	12.1295	-43.825	-27.7461	-11.8896	-11.0313	-29.0472	-30.5124
65.366	6.7583	5.70455	22.3601	-44.4398	-28.6118	-8.20624	-11.7655	-24.8387	-29.1633
66.033	5.41236	4.44025	18.372	-45.6274	-26.6516	-11.3234	-9.26678	-30.6224	-30.5143
66.7	6.90733	2.96058	21.8158	-45.3595	-27.0136	-12.5547	-9.93631	-37.1455	-33.2486
67.367	5.25203	4.77913	18.5731	-46.7487	-25.321	-14.625	-8.29007	-23.8934	-33.8663
68.034	7.43141	2.33198	15.1652	-46.0564	-29.1156	-9.49586	-5.20385	-26.1616	-35.4645
68.701	6.45026	-1.19901	18.6026	-44.9712	-25.0248	-10.6149	-7.63977	-31.0188	-30.481
69.368	4.85979	0.679192	12.7449	-44.728	-25.2452	-13.597	-5.88359	-33.5015	-33.276
70.035	4.70742	-0.72252	17.7662	-44.8303	-27.4528	-13.2006	-6.38879	-31.6869	-33.6096
70.702	3.77309	-0.60074	12.3874	-44.3766	-26.3714	-13.8606	-5.71718	-36.4989	-34.8706
71.369	7.79171	-1.68817	12.6968	-43.5107	-31.4143	-11.0811	-6.88291	-35.2124	-38.023
72.036	9.22772	-1.77567	7.08315	-43.8436	-25.8511	-15.0871	-5.88493	-44.8289	-35.2592
72.703	7.59886	-1.15502	5.61135	-42.6823	-28.0965	-6.03408	-6.47681	-40.7626	-40.461
73.37	3.54934	-1.77293	6.12449	-41.0998	-27.0297	-15.6258	-5.60208	-35.8871	-37.0146
74.037	9.50336	-3.03823	8.07788	-41.0085	-31.8058	-14.1827	-6.80867	-40.7702	-34.09
74.704	10.2789	-0.74526	11.6499	-42.3535	-28.8925	-11.7669	-9.06837	-39.2656	-37.2061
75.371	11.1701	-0.57462	9.90543	-41.411	-29.098	-10.6694	-6.39067	-40.015	-38.5279
76.038	8.00792	-3.24919	15.4453	-41.6656	-31.6154	-7.75189	-9.72447	-40.1516	-39.6109
76.705	8.16307	-2.72903	12.9026	-42.8919	-29.7839	-16.1819	-6.96079	-44.6306	-36.4239
77.372	9.69894	-4.06598	10.1448	-43.1084	-28.2483	-11.7533	-4.7948	-36.1736	-36.9152
78.039	8.53847	-3.04278	10.3228	-44.4049	-28.9929	-12.6555	-5.87754	-19.6608	-31.6729
78.706	11.6143	-5.70226	12.6993	-43.7901	-27.8476	-14.5993	-7.56391	-5.65422	-28.438
79.373	9.32589	-4.77179	13.7175	-43.8451	-34.9795	-9.94579	-9.25902	-6.45322	-31.9103
80.04	14.7003	-5.96901	8.62314	-44.2752	-25.7912	-10.5925	-6.53558	-7.53107	-27.2973
80.707	9.24704	-6.37721	9.72395	-44.9877	-26.9839	-7.07168	-9.03846	-14.6674	-32.9178
81.374	8.75465	-6.44445	10.6657	-45.6447	-27.6608	-16.2786	-5.73084	-13.7082	-30.3773
82.041	11.5242	-5.10091	14.2114	-43.0138	-26.7169	-10.4727	-5.67338	-25.0841	-30.4747
82.708	11.6542	-2.30087	13.4715	-42.5515	-30.5916	-10.3276	-5.33763	-21.2834	-32.6642
83.375	11.8572	-2.67986	8.43943	-45.6625	-32.3552	-13.8135	-5.82385	-32.0152	-32.2961

## Sheet: 30s stim_control
GCaMP responses of dilp2 to LED presentation
time (s)	fly1	fly2	fly3	fly4	fly5	fly6	fly7	fly8	fly9	fly10
0.667	-13.4539	3.24871	-2.93609	1.87268	-3.35177	-43.2605	6.72975	-6.65454	-9.28693	-20.1284
1.334	4.35086	1.34226	13.7722	2.98524	1.08343	-10.4053	2.22405	-6.07757	13.8394	-15.0204
2.001	1.50056	6.40044	10.37	2.27891	6.95612	-6.15496	0.43184	-7.5055	-4.9106	-14.0666
2.668	0.581925	1.15983	12.1162	4.26045	3.12058	-7.38493	4.71399	-7.50845	-2.89666	-5.66335
3.335	-4.74775	2.13309	6.31902	4.56067	1.35411	-6.54145	4.15608	-6.99842	2.94539	-3.82034
4.002	-2.86992	4.64299	5.43666	3.21297	-7.52813	-7.38083	3.7899	-6.32647	-12.1063	-10.3566
4.669	-3.46718	0.361348	2.14772	2.85502	-5.33424	-5.68096	0.444627	-3.38288	-13.5651	-9.59993
5.336	-2.68915	3.23721	5.06937	2.12128	4.52147	-0.78729	0.531859	-1.03161	-17.8814	-4.93946
6.003	-2.76434	3.55613	6.97478	1.10448	7.38738	0.265023	4.74611	-1.23053	-12.1976	0.03204
6.67	-2.55584	-0.4771	6.19647	-0.12238	0.393933	2.23735	2.98024	1.96503	-7.70253	1.83951
7.337	-0.77595	-2.94078	4.64019	-0.066	8.0953	-2.76429	2.37149	1.78772	8.06476	12.9479
8.004	1.04637	2.52294	0.608595	-1.01175	0.721033	-1.46435	2.68294	1.6662	37.56	2.88236
8.671	8.42534	0.444853	0.773686	-1.47816	-0.31633	1.05121	-1.23789	1.98343	35.8329	15.9887
9.338	5.98948	3.73027	-0.10795	-1.07081	-0.97672	1.53172	-4.14394	4.59095	22.6437	16.6665
10.005	8.16634	-0.28657	-1.10378	-1.8251	-0.14865	-3.06799	-1.75913	3.93455	22.2992	7.05829
10.672	5.4232	4.83306	-5.77556	1.34434	3.69477	-8.93599	2.03964	3.54241	25.8846	1.32091
11.339	5.58334	2.17982	-3.89052	1.71792	4.65604	-2.63169	1.64346	0.724869	13.8352	3.81486
12.006	3.88929	0.394202	-2.78674	-1.24189	-5.00572	-6.78442	2.17808	0.062134	3.00279	3.54276
12.673	3.72849	0.615239	-3.51578	-0.27313	-3.01538	-6.87615	5.00129	-1.68175	8.15091	-10.7724
13.34	2.64842	0.393314	-3.50799	0.241494	-2.26025	-8.12326	-1.26839	0.339165	5.3846	1.19286
14.007	4.09448	1.13104	-4.46623	0.271374	-3.16248	-4.29429	0.880451	-0.97728	-5.17921	-6.14896
14.674	-0.24939	-2.01545	-3.36003	0.168164	-0.08627	5.39823	-7.42994	-2.60583	-8.25373	-6.76132
15.341	-2.72381	-0.95521	-4.4535	-3.33171	0.583869	0.920258	2.21822	-1.9914	-12.7706	-7.89768
16.008	-5.07375	-0.42932	-2.45587	-0.68637	-1.12962	9.21068	0.619122	-1.50731	-8.51863	-8.28539
16.675	-7.04098	-5.36116	-5.23418	-1.75295	0.554436	6.64103	-1.04497	-0.04738	-12.8743	1.02882
17.342	-6.46745	-5.39524	3.64609	2.20904	-0.87264	9.7224	-5.90731	-1.10519	-19.1293	1.45204
18.009	-4.92881	-5.30841	3.6474	0.994781	-0.65897	13.426	-4.9395	1.17341	-26.6793	-2.82896
18.676	-7.38817	-4.87318	1.51717	-3.38061	-0.11286	8.38757	-4.39637	0.117758	-25.8006	-2.17677
19.343	-11.3443	-3.51554	7.363	-0.99386	-5.39971	15.0147	-7.95583	-0.34752	-24.5348	-6.10413
20.01	-13.3645	-4.888	4.10175	-4.0725	1.09053	8.70363	-7.50601	-0.69559	-22.8896	-5.12567
20.677	-11.688	-3.0062	7.69361	-7.32938	-0.50671	7.21394	-18.999	-4.05648	-40.4112	-14.4727
21.344	-8.77031	1.90409	7.42006	-9.3807	-5.02862	12.4092	-19.8195	-1.83341	-6.54049	5.54185
22.011	0.684013	9.09147	10.9348	-9.26634	-2.52974	14.0831	-22.7089	-1.95558	34.8944	12.0793
22.678	-1.68711	17.1236	6.83546	-9.37503	3.47893	20.3858	-24.181	-1.03879	35.5189	20.9022
23.345	-1.00042	26.3766	6.29233	-5.08198	3.39826	24.5453	-19.0589	1.10118	43.994	26.6931
24.012	-1.97126	33.752	13.5328	-3.44051	11.2461	37.8153	-8.51429	1.4425	45.7952	34.4918
24.679	-5.42261	39.2972	3.67974	-9.70289	4.46127	42.6409	-29.8366	0.770266	25.4911	36.3356
25.346	-6.26164	41.3544	10.138	-5.18579	11.3114	44.1698	-16.4974	1.36329	54.7967	50.2734
26.013	-7.29089	48.0644	10.5624	-4.5027	1.95217	61.1754	-4.43013	7.65636	84.5741	49.133
26.68	-6.38308	46.1768	5.60355	-8.82183	-2.83956	49.4782	-17.988	2.27579	52.2123	36.5385
27.347	-6.80845	42.7267	10.5267	-4.30573	3.34191	57.5845	-17.7696	3.03478	45.358	41.575
28.014	-8.23237	40.0927	15.9606	-0.62668	5.45002	51.5281	-13.8346	1.40671	48.7448	43.6894
28.681	-8.45122	37.2943	7.59326	-4.6196	-8.8487	49.034	-19.9219	0.429773	27.4077	32.7603
29.348	-7.65613	39.3155	3.3794	2.42093	4.66342	52.0034	-28.4882	4.2077	42.6515	46.4223
30.015	-4.00037	43.119	10.2348	6.2707	0.925599	40.3539	-16.7244	3.84149	43.9984	54.2536
30.682	-5.30591	36.9222	-1.10958	-0.43414	-10.9763	45.8921	-22.6344	2.03477	12.4559	49.3326
31.349	-3.37347	36.971	1.86425	4.83179	-6.15305	42.2505	-10.7817	1.82855	44.7843	59.018
32.016	-2.10001	39.6012	2.48649	8.65714	0.44464	50.8341	-10.448	3.34881	47.1741	52.0729
32.683	-4.84445	35.4375	-3.71538	1.51826	-4.7337	47.1716	-22.9558	1.32822	35.4475	45.9988
33.35	0.95459	42.4787	-1.97011	2.81046	-2.36772	48.1856	-14.0732	4.26118	39.1581	49.7085
34.017	3.99363	37.9807	-1.44983	7.3395	-3.17332	50.1997	-9.0422	6.80576	64.3657	56.0829
34.684	3.33247	35.5462	-5.65619	0.301374	-5.21315	41.1358	-26.4881	2.56746	53.6934	43.4096
35.351	-0.56671	32.7736	-5.36144	5.36317	-0.96349	45.7803	-25.2501	8.1288	80.1871	61.1107
36.018	-0.62145	33.9666	0.505171	5.02903	-4.93416	40.3148	-13.3384	7.28487	99.6032	72.0863
36.685	-4.349	33.1165	-9.69813	-4.10404	-8.55153	43.3068	-30.1037	5.46773	62.0367	57.6941
37.352	-2.26507	35.2456	-7.05266	-3.10252	-7.61433	45.545	-17.4892	9.41298	68.7881	63.6703
38.019	0.981598	33.0839	-2.8119	-0.80543	-5.96244	34.5987	-14.4966	8.45409	83.3517	64.8801
38.686	-2.2009	28.7377	-8.84773	-6.62916	-1.41522	42.7538	-20.9392	3.90592	60.4314	50.8277
39.353	5.18173	28.4543	-5.02119	-0.61683	-2.38383	36.1523	-12.3474	3.19392	94.8484	64.4804
40.02	7.39838	29.1874	0.100002	2.97022	-3.7019	43.1209	-11.5689	6.59764	90.6092	59.0942
40.687	3.19012	26.2895	-5.05188	-4.90023	-16.8225	39.0942	-17.1398	-0.49725	73.5875	51.0591
41.354	6.71946	29.2352	0.3383	-2.6955	-10.4422	34.5607	-13.0631	1.39215	72.5804	62.3213
42.021	6.36289	31.0688	3.22636	2.55332	-4.65269	41.208	-13.7604	5.24905	102.631	64.8611
42.688	2.20449	30.2763	-2.36542	-1.72581	-8.2181	25.0856	-22.7683	0.503709	82.7173	58.6321
43.355	6.91227	24.5903	1.06195	-1.21685	-10.5734	34.1211	-14.1974	5.10125	97.4946	60.5897
44.022	0.255348	22.4996	6.79873	1.4928	-6.39263	29.2881	-3.76532	5.26637	91.2196	67.4364
44.689	2.19224	23.0802	-3.87022	-2.41829	-11.6362	23.0547	-23.5118	2.00717	62.8362	57.949
45.356	3.18108	24.9099	0.438759	0.179358	-5.14432	22.2252	-25.5049	3.16225	62.8596	68.5412
46.023	6.96054	23.9446	4.23131	1.40987	-8.31834	14.6904	-11.983	5.63734	74.5102	69.109
46.69	2.00375	18.2511	-1.60777	-3.82663	-7.16867	20.6485	-27.453	2.95559	55.9983	66.7722
47.357	-0.82798	20.9163	3.60288	-1.32884	-7.4905	18.3722	-17.1007	5.69029	62.243	66.13
48.024	3.50796	21.6051	10.2565	1.67878	-8.42874	21.7069	-15.6257	7.42256	63.488	65.8014
48.691	2.85436	19.1998	7.81907	-4.51534	-6.71739	16.4039	-18.8371	3.13557	43.5695	57.5738
49.358	3.56027	17.3379	7.39097	-0.20087	-7.82075	12.9348	-17.1012	9.22398	67.1118	47.1261
50.025	3.50333	23.4081	12.2864	0.132287	-4.89333	19.1997	-17.6238	8.87507	64.3052	55.569
50.692	-1.16922	20.7562	8.19332	-0.42444	-11.2768	10.3981	-16.3527	10.8209	62.2386	44.0221
51.359	1.5592	21.3808	9.25227	-0.28516	-3.83454	20.3014	-16.1855	9.52475	54.9289	38.9862
52.026	1.23443	19.5805	4.95088	-2.52641	-12.2056	20.2839	-18.0296	7.74037	51.5194	31.1341
52.693	-4.9245	20.9758	-1.58005	-10.0544	-11.9307	21.1675	-31.0136	4.63467	31.0914	35.7189
53.36	1.12301	19.1068	-0.93929	-8.2239	-10.2571	28.9093	-24.5158	5.68475	45.6257	42.9767
54.027	0.142244	14.379	-2.73357	-6.95581	-13.3097	22.0537	-19.9645	5.26615	45.1887	43.4146
54.694	7.89178	16.9002	5.87944	-3.23731	-11.228	32.8985	-16.8702	3.75578	75.9448	47.6113
55.361	8.38732	15.7986	7.26467	-4.95774	1.01162	25.8036	-16.0236	4.20118	58.489	46.7745
56.028	5.80868	12.5265	2.48558	-3.05134	-1.53316	27.1508	-16.1086	3.70032	50.1806	37.2286
56.695	4.97629	11.2942	5.72446	-5.03756	-2.28395	22.6982	-14.9931	3.8661	46.5312	36.2918
57.362	2.53017	11.9657	6.68063	-5.09037	-7.30769	19.2231	-22.0183	0.642321	23.1204	18.4195
58.029	-2.87582	10.415	7.20904	-5.56618	-6.43036	22.0217	-16.1648	-1.57979	35.259	24.4541
58.696	-6.37986	9.05351	1.20977	-6.98478	-5.30584	14.3668	-11.5995	-1.66954	27.4179	17.5433
59.363	-9.48308	9.11913	3.50307	-8.7808	-3.37298	19.1113	-15.1839	-1.49178	12.5206	10.7857
60.03	-7.42048	8.47221	5.85265	-7.71667	9.87678	11.6143	-17.0566	-0.9749	18.1515	9.32856
60.697	-11.304	7.98883	7.64094	-8.53935	8.68984	10.6139	-20.4599	1.11407	4.85607	2.90996
61.364	-13.4496	7.62171	7.5616	-9.76665	11.6721	14.6431	-15.0189	0.577558	5.18497	2.97216
62.031	-16.4361	8.41252	0.277843	-10.4591	5.90395	4.91461	-19.0125	2.71337	2.60596	-6.52668
62.698	-15.6525	5.27307	4.86841	-10.1552	7.57231	5.65538	-19.7998	-0.56873	-0.84445	-10.5714
63.365	-15.5986	8.41343	1.00326	-11.3313	2.48326	3.11751	-19.6156	-0.43316	8.44052	-10.2081
64.032	-17.7029	3.62668	-0.58385	-12.0467	14.6256	7.80366	-18.1413	-0.05989	13.5854	-15.4157
64.699	-18.886	5.28659	-1.75922	-12.4991	-0.55928	4.62246	-17.6263	-0.58582	8.65805	-14.5915
65.366	-16.9956	4.34344	2.72355	-13.2771	2.46832	1.24284	-23.7835	-3.61202	-12.7388	-22.8
66.033	-19.2521	4.42058	-2.44381	-13.5665	10.0157	4.25916	-24.7906	-4.67659	-9.26119	-18.2011
66.7	-23.6751	5.37701	-3.05754	-13.0927	3.22628	-5.54888	-16.5126	-5.65929	-26.1239	-25.6216
67.367	-20.4466	0.682247	-2.04787	-13.3705	8.11687	-3.22672	-23.4885	-4.8272	-17.6189	-20.434
68.034	-23.8396	0.946085	-2.14395	-13.53	2.52118	-7.53735	-21.0035	-5.84583	-22.2543	-22.6823
68.701	-25.3656	3.3037	1.39908	-15.009	0.577931	-4.90792	-22.7759	-7.18314	-25.7596	-24.1517
69.368	-24.3663	0.150917	3.27143	-15.6649	1.6257	-7.50935	-17.1527	-4.05577	-19.2641	-21.5447
70.035	-26.0064	4.43937	-3.39105	-15.3103	-2.81999	-16.179	-20.0927	-2.97216	-11.6564	-30.9074
70.702	-29.5064	1.19291	-2.05395	-16.4714	3.24556	-9.81184	-21.2855	-2.89344	-12.4978	-31.3834
71.369	-29.5875	2.41979	-6.7366	-17.792	-1.95821	-10.2814	-10.8799	-1.98448	-16.2726	-36.5173
72.036	-30.372	2.10465	-4.99438	-17.0015	-2.4669	-4.1157	-19.537	-3.81233	-36.3735	-27.7338
72.703	-33.2811	2.0444	-4.94096	-16.1443	9.27784	-6.50403	-19.5182	-5.40569	-32.9854	-30.8899
73.37	-32.0419	1.84413	-4.01577	-15.2538	-10.8574	-8.67525	-20.7673	-4.72828	-43.1876	-26.8436
74.037	-30.8761	3.05751	-8.81351	-12.7248	0.671444	0.596492	-20.5134	-3.89099	-29.7783	-33.397
74.704	-34.0866	-1.00692	-10.4822	-11.2326	-4.74921	-0.1336	-21.5666	-5.37698	-48.5243	-33.076
75.371	-31.4183	-2.94504	-11.5387	-11.4725	-6.2025	14.3512	-27.9329	-2.8794	-34.3119	-34.7755
76.038	-32.357	-1.09864	-12.6916	-13.5129	3.35377	14.432	-20.3173	-5.87263	-43.5951	-35.4782
76.705	-28.4029	-0.86056	-12.6918	-14.3603	-4.7878	21.132	-23.1611	-2.90092	-45.999	-39.5534
77.372	-31.289	-0.63156	-14.978	-12.7726	0.842034	24.1196	-20.0558	-6.70543	-45.5953	-39.7579
78.039	-29.5711	-1.93863	-16.6901	-12.1545	-1.87977	20.2131	-26.376	-6.06907	-38.1319	-40.2223
78.706	-32.0534	-3.41835	-16.9776	-11.7953	-5.12072	25.6077	-22.8469	-5.44849	-48.9574	-36.227
79.373	-32.3326	-4.45946	-16.1185	-12.1442	-0.12653	11.4173	-23.8063	-7.46598	-40.4275	-41.5896
80.04	-32.9123	-1.89212	-14.2935	-12.8223	-4.44809	18.1678	-24.0596	-6.99303	-56.6676	-39.3009
80.707	-30.8542	1.25242	-17.4427	-10.88	-5.0966	15.5059	-23.6812	-6.95421	-54.889	-39.3662
81.374	-31.982	6.73181	-16.1246	-11.8753	-10.1959	21.1716	-22.3289	-3.78116	-47.1454	-47.8672
82.041	-29.3253	7.83469	-17.3174	-10.5782	-12.29	32.2823	-20.0888	-6.16412	-60.47	-40.3023
82.708	-29.6575	6.90589	-19.3772	-10.7864	-9.02349	19.4553	-20.9618	-3.63186	-63.4281	-40.286
83.375	-32.2295	3.7229	-16.4145	-10.7333	0.001221	25.1572	-25.0436	-1.05803	-48.2517	-32.953
84.042	-31.3	5.43436	-14.4604	-8.17833	1.79244	19.9127	-25.7845	-1.86412	-47.39	-33.919
84.709	-30.4935	5.36899	-4.56541	-8.83177	-10.637	27.9254	-18.8592	-2.02176	-43.0613	-33.408
85.376	-35.2317	3.81841	-0.72516	-9.59988	-3.70227	21.5302	-20.3199	-5.67081	-52.6239	-27.3327
86.043	-34.1592	3.37929	3.45553	-9.2161	-8.35929	14.7288	-15.975	-4.25593	-61.8116	-32.5697
86.71	-34.7783	4.19286	2.35833	-8.75817	-7.4158	22.3923	-19.7961	-5.7654	-59.1733	-29.7726
87.377	-34.9925	2.76569	0.62472	-10.5842	-3.46765	12.0184	-25.2578	-3.0549	-62.4586	-36.6707
88.044	-34.2342	0.303142	-4.20651	-7.87431	-1.67263	16.7455	-27.2157	-5.98593	-54.2509	-35.3096
88.711	-36.7684	0.003051	-2.31096	-9.87015	-9.36894	10.9993	-22.7415	-2.91495	-67.2354	-36.3625
89.378	-35.6562	-4.23364	-0.78131	-10.369	-6.82376	11.3342	-17.8076	-2.57264	-68.2497	-36.2962
90.045	-35.1291	1.19967	-4.17717	-8.08764	-8.43043	23.9681	-25.0421	-4.27981	-60.5132	-30.0782
90.712	-36.4191	-1.28465	-2.30695	-5.36612	-5.84915	23.6466	-22.0368	-3.16367	-57.7107	-28.7952
91.379	-35.6113	0.262243	-6.26542	-2.46506	-7.79919	29.4274	-14.7445	-1.0192	-55.5011	-27.5953
92.046	-35.5211	-1.98746	-0.68897	-3.44891	-5.3499	22.7561	-23.8662	0.352607	-57.2937	-22.2957
92.713	-38.7663	-3.56395	-2.32392	0.944937	-11.4597	26.393	-22.826	0.932093	-63.6419	-16.7988
93.38	-37.3414	-1.26778	-3.18775	2.77314	-4.8104	25.9663	-25.2353	2.40726	-63.8325	-14.1046
94.047	-37.175	-1.75172	-3.59904	2.99505	-5.35313	21.6384	-22.1381	3.98244	-60.757	-19.4122
94.714	-34.323	-3.80814	-6.98191	4.70961	-8.01573	22.0425	-27.128	4.86528	-71.232	-25.7139
95.381	-38.6256	-3.33551	2.22412	5.12058	-8.85126	14.3742	-23.7701	6.47588	-49.6871	-23.3684
96.048	-40.5886	-2.26644	0.995869	8.63555	-9.70696	16.2929	-20.4556	7.27213	-58.6245	-19.5681
96.715	-38.2115	-4.39594	1.25042	9.97148	-5.48481	8.00828	-15.0579	6.10705	-57.3989	-22.8321
97.382	-39.2254	-3.78834	3.14121	7.42134	-11.1848	16.3557	-22.8872	6.4001	-50.5386	-26.5479
98.049	-40.3797	-3.81937	0.973026	10.1875	-5.18852	13.1681	-23.0529	8.76041	-62.4335	-19.3566
98.716	-37.0967	-3.14701	6.0298	11.3481	-14.2472	6.17116	-20.7202	7.27372	-50.2958	-22.4888
99.383	-38.1756	-5.84512	0.493663	13.0094	-7.59595	14.382	-19.3942	6.34523	-59.4939	-21.411
100.05	-40.2661	-4.60429	1.12221	14.2691	-12.5	9.36836	-17.7941	8.88461	-65.9582	-24.2389
100.717	-40.4054	-3.46676	0.671147	15.6793	-12.7185	16.4669	-26.0956	7.23561	-65.5317	-29.1081
101.384	-41.096	-6.63633	1.17144	16.02	-11.0638	21.1862	-20.9174	7.95584	-72.94	-21.6325
102.051	-40.2745	-6.01766	0.510277	18.6012	-6.58756	17.7134	-24.444	9.79576	-71.9718	-17.8069
102.718	-39.9563	-7.578	-1.22872	16.5491	-7.91516	20.536	-21.3494	10.5019	-75.7075	-17.9593
103.385	-42.2933	-4.43571	-3.57161	25.9311	-6.98887	10.3477	-22.3759	8.52913	-71.2257	-20.7661
104.052	-44.4795	-7.78256	-5.10712	30.044	-9.1726	14.7354	-16.4442	9.31908	-77.2696	-20.8563
104.719	-43.8886	-6.41749	-5.32498	32.7481	-5.53687	5.61608	-21.0903	6.67951	-74.528	-17.6293
105.386	-43.9655	-3.87858	-8.33001	36.4036	-5.54736	6.80972	-26.3309	9.22361	-75.7389	-19.7557
106.053	-44.6613	-2.43351	-12.0632	40.2816	-7.92692	9.47358	-24.642	10.3727	-76.4893	-20.0056
106.72	-45.2079	-8.30888	-9.34645	40.8211	-8.86016	0.209693	-20.1201	7.53719	-79.5319	-19.1168
107.387	-44.3224	-6.15563	-11.9547	42.0477	-3.66368	3.78826	-25.508	10.934	-72.9568	-10.7009
108.054	-45.5544	-8.88551	-8.25591	39.1651	-3.12473	-4.59577	-16.7411	9.12538	-60.0137	-14.0127
108.721	-46.6198	-9.84686	-11.4072	43.2022	-6.43946	-0.34062	-23.7857	8.46582	-69.5022	-12.9744
109.388	-45.3645	-6.89987	-8.09159	52.6966	-5.20688	-3.56091	-24.0374	7.4473	-53.6918	-10.863
110.055	-48.3559	-10.4469	-4.63642	53.1945	-9.33592	-2.46503	-32.2954	6.88361	-52.8469	-7.41212
