# Supplementary material for: Hunger- and thirst-sensing neurons modulate a neuroendocrine network to coordinate sugar and water ingestion
Source: eLife. 2023 Sep 21;12:RP88143. doi: 10.7554/eLife.88143 (PMC10513480; doi:10.7554/eLife.88143)
Supplement: Figure 4—source data 1. [file elife-88143-fig4-data1.xlsx]

## Sheet: 2s stim_ISN
GCaMP responses of CCHa2R-RA to optogenetic activation of ISNs
time (s)	fly1	fly2	fly3	fly4	fly5	fly6	fly7	fly8	fly9	fly10
0.667	5.15714	9.11546	-5.73694	0.84154	3.67933	1.31459	-0.71734	-1.41122	-0.07634	-4.59121
1.334	-1.07684	13.4031	-3.39648	1.04088	3.39979	1.37146	1.1495	1.68737	-1.27167	-7.38618
2.001	-3.5721	5.71567	-6.88989	-3.47192	1.38937	5.49237	1.08492	-0.14092	-0.14763	0.787113
2.668	0.039443	-4.03241	-4.55988	-2.36154	0.758511	4.39075	-1.31261	-2.38363	-0.02185	-2.47862
3.335	-2.84176	5.25675	-4.51032	-1.33153	3.17681	-0.7064	0.073371	-1.21181	3.50769	6.19989
4.002	0.335389	-5.97904	-2.0447	-2.42487	1.33321	3.0094	-1.00138	0.119704	0.129584	2.13416
4.669	-1.40241	-4.68678	-3.74876	-0.09339	0.32141	1.30564	4.63082	-0.11034	0.380429	-1.65927
5.336	-0.34186	-8.09366	-0.19911	0.92603	1.50163	1.25909	-0.9191	-1.16604	0.455205	0.314244
6.003	-3.17239	3.5146	1.37793	-2.61752	2.12111	3.31547	1.12845	-0.0994	2.3037	-2.38793
6.67	-1.03368	4.40794	-3.6297	-2.62149	0.716485	0.955645	1.06362	3.77883	2.21512	-3.84396
7.337	-0.97614	0.947755	0.193744	0.994652	-0.16857	0.048732	1.95541	6.47883	-0.80007	-1.7794
8.004	1.34521	-1.95845	4.49586	-0.38476	-1.5062	-1.00652	1.82114	5.92523	2.14022	4.02271
8.671	1.29055	-0.06103	5.47252	1.79421	1.4452	-0.24233	1.96051	4.7119	-2.2762	2.62697
9.338	-1.26902	9.94184	-0.06938	2.90844	2.64148	1.28202	0.083885	3.62378	-1.6678	-1.5432
10.005	0.32913	-3.14967	4.31832	-0.2353	0.050784	2.32422	0.037192	3.39424	-0.61504	-3.02976
10.672	-0.55835	-5.63842	0.227327	1.43971	-0.96704	-0.76446	0.277951	1.57886	-0.93896	4.43635
11.339	1.91468	-5.98897	1.95089	5.3304	0.034133	6.55716	0.038115	4.47075	-0.3886	4.7573
12.006	4.90921	-0.74926	5.74908	1.41417	-2.29712	0.508152	0.162719	3.62222	0.820787	-3.18589
12.673	1.14612	0.517469	-0.24183	-2.34646	-2.0732	2.3697	-2.57946	1.46859	1.02368	1.14366
13.34	-0.49735	5.09282	4.53606	1.50821	-3.00243	-2.54892	-0.32191	0.25846	-0.87579	2.89809
14.007	1.70589	-7.54742	4.6046	0.135123	-0.37684	0.842135	-0.71676	-1.14463	-0.34407	0.126752
14.674	1.87317	-8.15992	2.85847	-1.2157	-0.42603	-0.49117	-1.51872	0.137031	2.40609	1.40009
15.341	-0.63716	4.26025	-0.76601	-0.22204	-0.3836	-1.05517	-0.28172	-4.68746	0.571674	4.17461
16.008	1.14897	-3.2929	5.23483	-0.98526	-0.92579	-3.68721	-2.34044	-7.30008	-1.03294	-0.73689
16.675	-2.92814	3.59244	-5.31268	-0.82599	-0.55743	-5.20941	-0.75331	-4.59646	2.05047	-1.0996
17.342	0.055988	5.57078	-7.43217	-0.94936	-0.92961	-3.93798	-0.05339	-6.54933	-4.21388	0.772469
18.009	-3.17529	9.26531	-8.22269	-0.54847	1.69205	-4.27061	0.549039	-6.08236	-1.78036	-3.97935
18.676	-0.0625	8.19434	-9.35258	-0.98033	1.75635	-0.56357	-3.22266	-7.83232	0.436747	-5.56218
19.343	-1.56391	5.1981	-6.69673	-1.20393	-0.95448	-0.30171	-0.92089	-8.9905	1.48418	-3.42442
20.01	-2.32652	-0.60751	-12.179	-2.54641	1.65321	0.084518	-2.68618	-7.14186	0.582847	-7.49043
20.677	2.3809	16.025	2.29726	7.76469	4.9635	13.3641	2.00018	3.70447	10.5811	11.2721
21.344	4.88812	26.3307	1.34224	13.3897	5.10972	17.2566	3.07273	7.28842	12.9739	18.2543
22.011	2.11095	25.3996	4.91206	16.3617	9.19169	16.4107	4.75675	2.93224	12.46	17.5359
22.678	1.51936	37.6654	-0.52246	15.8318	1.14704	17.0454	1.64203	0.888668	9.24219	14.8748
23.345	-9.00158	20.5507	-4.12478	14.373	0.400054	11.9393	1.16265	-2.30238	7.55308	9.22269
24.012	-6.71818	16.7698	5.1421	8.71206	-0.00968	7.39851	-1.67402	-2.74899	9.7369	3.53923
24.679	-3.89856	10.3959	-6.79164	9.22742	-3.34069	2.80681	-1.10646	-1.29925	5.00047	4.24038
25.346	-5.45953	1.31326	-7.88028	11.0307	-2.12969	-0.35134	-1.65828	-3.05166	5.3617	3.32603
26.013	-4.1454	-3.13941	-9.39668	10.2414	-4.35478	-2.09871	-0.41752	-2.15177	2.03024	1.77595
26.68	-0.49304	3.14887	-6.91972	8.8194	-1.04336	-1.61269	-3.88298	-3.23857	5.92172	1.40996
27.347	-5.66697	5.077	-8.26841	4.7168	-0.7196	-5.39939	-2.02936	-4.65333	4.2864	-4.68725
28.014	-0.62418	8.8295	-10.257	6.12424	-0.99654	-6.29569	-3.82608	-1.21057	5.90286	-2.61243
28.681	-7.12776	16.5317	-14.2871	7.2459	-0.01177	-4.20395	-0.88221	-3.58884	5.42686	-0.96249
29.348	-2.27461	23.7517	-8.93117	8.88609	1.87408	-5.56425	-1.89751	-0.14971	3.22383	0.419093
30.015	-4.79688	21.7463	-10.1252	6.59682	3.64261	-5.86626	-2.37842	0.816046	5.96442	-5.65581
30.682	-7.41608	29.9919	-7.84709	5.45458	2.76077	-5.6038	-2.71458	1.33211	2.2326	-2.46462
31.349	-6.50647	31.1482	-12.3881	5.99804	4.68185	-3.75339	-3.40042	2.14176	2.01612	-0.92525
32.016	-5.03357	20.4293	-11.1618	3.09102	4.17437	-0.849	-1.36755	3.11318	1.1449	-2.48807
32.683	-3.61341	23.6463	-5.33777	3.45482	5.14622	0.082692	-3.34129	1.20794	0.145889	-0.62144
33.35	-4.69769	30.7865	-13.1325	1.75694	4.05919	-4.06431	-2.46641	2.09251	1.62912	-2.79203
34.017	-3.52846	24.5147	-8.76142	-0.39571	2.19231	-3.39743	-2.60035	0.400484	1.51344	2.80966
34.684	-2.80364	31.3276	-11.6794	-1.42466	3.99079	-1.62155	-0.99478	2.33286	-0.51997	6.39698
35.351	-6.26757	28.2721	-6.07751	-0.66695	3.60201	0.736858	-1.14189	1.7263	-0.93552	8.25122
36.018	-5.25663	27.4636	-11.4442	-1.68586	2.17241	-0.61739	-0.17004	3.5138	-0.63277	3.17701
36.685	-0.14721	29.2057	-9.87575	-2.62849	3.75806	-1.1773	1.18944	1.67183	-3.01828	3.37714
37.352	-1.53561	29.0442	-7.38292	-2.14203	3.18914	-0.53063	0.122795	0.417117	-3.43674	7.14631
38.019	-0.86005	29.4572	-6.2433	-3.94305	5.13633	-1.96238	-1.86676	1.46656	-2.95502	5.67119
38.686	-2.10814	25.6751	-15.4867	-3.00306	1.53679	-0.38647	-1.79399	1.76242	-3.6129	9.57533
39.353	-5.09191	23.7182	-11.8583	-6.09562	1.00264	0.721518	1.34697	-0.25977	-1.55013	7.80635
40.02	-2.56275	31.8019	-12.832	-6.06182	3.71112	1.42184	-1.80026	0.511329	-4.63643	5.11998
40.687	-3.66874	25.13	-6.44892	-4.25558	4.36295	4.37753	-0.11053	-0.26106	-3.78793	5.23675
41.354	-2.06939	26.8956	-11.4538	-6.02856	0.971939	2.49525	-1.44594	-2.17544	-4.33473	0.689931
42.021	-2.09691	19.2571	-16.4493	-6.31536	3.15419	3.35328	-1.00664	0.71028	-2.27504	7.06097
42.688	-1.85296	30.7761	-9.37201	-4.93048	3.01133	-0.93139	-0.0066	1.61798	-5.08428	2.91573
43.355	-4.57247	22.1355	-10.6169	-7.33639	1.82486	4.13091	0.12956	-1.04919	-0.68293	2.18556
44.022	-3.8637	23.5707	-9.96992	-6.11413	3.97868	3.64639	-0.59881	1.49876	-2.1881	6.3342
44.689	-4.05443	28.8768	-11.8874	-0.78869	4.42318	3.33988	1.6354	3.68239	-1.36544	5.37004
45.356	-5.92901	21.5437	-7.59279	-3.94278	2.10541	0.261355	-0.81851	4.91505	-3.51409	0.865329
46.023	-7.34408	21.2728	-14.3088	-2.665	3.10923	-0.31951	0.091886	3.41061	-0.28213	-1.86073
46.69	-3.57818	15.8989	-16.1936	-3.77597	1.77339	-0.10905	0.811573	2.92233	-1.79032	1.79791
47.357	-5.27386	12.893	-13.4659	-3.946	1.87567	-3.04995	1.05411	3.05482	-0.7965	4.86288
48.024	-10.4685	28.2412	-10.6647	-2.78518	1.79929	-3.27098	1.55008	3.3617	-0.09989	8.22725
48.691	-8.58762	19.7236	-13.3675	-1.6733	0.634648	-4.69486	-0.0626	2.98248	0.607644	9.9688
49.358	-8.7983	24.743	-11.9403	-6.87985	3.08432	-2.42069	-0.19639	2.12684	1.18232	6.2809
50.025	-7.37778	23.1073	-16.5058	-6.78079	0.002319	-3.62065	-2.83245	1.19732	-0.00717	4.14763
50.692	-7.3077	20.4418	-4.90978	-4.83131	1.28345	-1.02309	-4.12065	2.00656	-1.41264	10.7284
51.359	-5.32328	22.4298	-8.43891	-7.11024	3.35841	-4.06738	-2.51315	1.48776	-2.07828	8.19112
52.026	-1.31281	8.06217	-7.68782	-2.58121	2.37552	-2.07806	-0.28252	1.88296	-2.08486	12.7995
52.693	-1.61264	19.2518	-11.1401	4.32192	4.61234	11.4768	2.04476	5.04061	7.78004	18.293
53.36	3.57085	20.5518	-1.42864	11.3435	5.95244	12.1649	3.79163	8.18914	10.0377	24.6185
54.027	3.28356	31.7091	-2.71307	11.6925	5.82315	16.9039	2.99686	8.30578	11.2341	22.8966
54.694	-0.43147	36.0606	3.36511	7.34484	3.36031	12.4639	-0.7144	7.11939	7.49238	22.2022
55.361	-1.69157	11.8783	-3.60216	5.61758	0.203784	7.97293	-0.48043	3.9251	2.82874	19.6969
56.028	-3.86509	23.2771	-1.41901	4.46669	-0.74484	5.05555	4.42656	4.71793	4.93166	18.6221
56.695	-2.05458	21.2424	3.66355	-1.00632	-1.02098	1.01022	-0.80785	2.81968	0.826037	22.1931
57.362	-2.27369	8.07056	4.18742	-1.61457	-0.25181	0.293156	-1.90055	3.79771	0.038088	12.4382
58.029	-5.27988	1.39499	-10.3561	-3.77582	-1.5717	-2.79419	-1.52706	5.32636	0.347029	18.3267
58.696	-4.84873	5.86649	-2.80185	-1.43505	-0.57829	-5.07927	-0.76314	2.87875	-0.6377	10.5252
59.363	-7.99975	2.12755	-0.14505	-3.25548	0.08151	-3.13213	-3.74375	4.90151	-2.60655	7.34028
60.03	-3.40091	14.0802	2.80169	-6.46209	-1.98522	-3.99216	-2.21371	2.55609	-1.92106	9.27751
60.697	-4.47491	10.0152	-1.24086	-6.14147	-2.73004	-4.9717	-0.09906	5.76038	-1.52484	8.94745
61.364	-4.82175	14.0844	1.42725	-8.42255	-2.51366	-6.8241	-3.77333	4.8526	-3.12279	9.10217
62.031	-2.04292	11.8406	-3.21342	-6.26752	-2.07782	-3.95677	-2.63522	3.49559	-5.20756	8.33051
62.698	-9.5305	12.3103	-1.96293	-8.49483	-2.64562	-2.26579	-3.69887	3.49709	-5.17006	1.28617
63.365	-7.56365	14.7721	-1.36184	-7.34793	-1.78742	-4.18635	2.00113	4.46248	-4.68517	3.47606
64.032	-3.44313	14.443	0.474323	-4.86313	-1.40806	-2.04142	-2.83894	5.00544	-7.29952	4.10678
64.699	-4.26077	17.4133	-2.81308	-7.23451	-1.11094	-2.59155	-2.7673	4.04799	-7.07268	1.12129
65.366	-1.89807	13.7271	-8.85281	-4.00232	-1.00473	-1.10649	-1.46874	6.05902	-7.29808	4.15271
66.033	-0.68132	16.6983	3.45178	-6.23669	0.785915	-4.82117	-1.79605	6.75007	-6.36962	1.186
66.7	2.55758	16.6889	-6.77887	-5.66724	0.552127	-4.09301	0.474525	6.26038	-5.14432	1.57274
67.367	-4.1607	8.30707	-3.16185	-7.58848	-0.62989	0.16875	-1.82736	4.21002	-6.46032	8.40632
68.034	-0.08484	15.9457	-2.99393	-6.50849	2.2825	-3.03041	-2.53646	4.45448	-4.87852	6.97445
68.701	-1.35696	9.50931	-4.34627	-7.42525	-1.3026	-0.5707	-0.38834	4.88464	-4.24914	-0.87714
69.368	-5.74876	10.576	-4.01411	-7.38554	1.72998	-3.27246	-0.35893	1.50546	-5.79849	9.13019
70.035	-2.67134	14.7853	-7.89734	-5.67141	2.58222	-1.70824	-0.88855	1.97342	-6.0948	5.92864
70.702	-4.21581	13.1807	-7.84977	-7.23106	0.441272	-2.93655	0.393631	4.14806	-3.62731	4.48915
71.369	-3.77841	24.7643	-1.61514	-5.36981	0.39119	-5.24458	2.24255	5.46382	-2.18455	8.41415
72.036	-5.60386	14.5766	-4.52985	-5.36945	1.57575	-3.44173	0.387395	4.15374	-2.2656	2.42612
72.703	-8.46462	24.6377	-7.26257	-9.03375	1.08178	-2.71523	-0.15393	3.22313	-1.72989	-1.14038
73.37	-3.16037	8.12351	-0.11166	-5.76468	-0.47977	-0.32603	0.877288	2.74835	-1.72148	13.3745
74.037	-4.27038	18.686	-1.68336	-4.99565	-0.59545	-4.94839	-1.37738	2.16653	-0.70425	4.68648
74.704	-3.467	15.7592	-11.1095	-2.28485	1.06262	-2.46225	0.462802	2.48112	-1.02904	10.4921
75.371	-5.0617	16.5525	-7.6448	-3.06234	3.29691	-1.59168	-0.49106	0.669808	-2.33446	5.14871
76.038	-3.70522	13.1816	-2.84233	-1.80649	0.424361	-0.41568	1.19318	4.98562	-3.48818	11.3294
76.705	-9.2096	3.95343	-5.27255	-6.72211	3.17218	0.897676	0.22186	-0.89022	-2.53053	6.43563
77.372	-12.3579	2.66643	-2.40818	-5.55307	1.48175	-0.07234	0.609523	1.99833	5.05482	11.2924
78.039	-4.64938	5.86225	-4.15124	-5.74667	0.88225	-0.64125	-0.94883	1.11111	1.307	7.93176
78.706	-4.65928	7.00143	-16.5908	-6.80111	5.15351	-1.24647	1.05848	2.46502	1.90286	7.88456
79.373	-3.80999	12.4956	-12.3196	-6.38436	1.31244	-4.59751	-0.1098	1.65695	1.69552	13.7464
80.04	-7.78934	5.22399	-8.65637	-7.01376	1.45309	-1.3076	0.901744	0.889635	2.41818	5.39997
80.707	-8.33889	3.4964	-7.11022	-7.43496	1.80314	-2.97045	-1.83503	3.12897	2.67326	13.3825
81.374	-2.23872	10.9849	-14.9276	-6.16348	1.70753	-6.60107	-0.69889	3.25759	2.82154	13.6807
82.041	-6.59862	8.76183	-4.57747	-5.59101	0.981142	-5.25671	-1.46981	-0.9287	1.08616	15.3759
82.708	-4.01704	3.11634	-10.0813	-4.04873	1.05927	-7.11747	-1.87307	-1.57158	1.55835	15.0782
83.375	-7.52298	10.4364	-13.2164	-4.41031	-1.76487	-3.6764	-1.52351	0.356511	0.677201	10.9565

## Sheet: 30s stim_ISN
GCaMP responses of CCHa2R-RA to optogenetic activation of ISNs
time (s)	fly1	fly2	fly3	fly4	fly5	fly6	fly7	fly8	fly9	fly10
0.667	5.91805	7.91868	-9.9213	-6.59611	4.69515	1.88154	0.49453	5.16322	3.84741	1.66657
1.334	2.5299	3.31841	-13.2935	-6.52086	4.06485	-1.8462	-0.46545	2.59364	5.3946	0.826318
2.001	5.58507	1.68456	-10.324	-7.10453	5.17893	-2.27644	1.19892	5.41136	3.13249	-0.69665
2.668	5.0831	11.2708	-12.4492	-7.98938	4.22766	3.9578	0.429964	1.91445	3.34251	-2.21241
3.335	0.608322	-1.88814	-4.11089	-6.4841	2.72363	3.78959	0.953036	2.90623	2.21479	1.32108
4.002	3.787	6.22356	-1.16234	-5.82144	2.55566	3.08586	1.24867	3.93183	4.08193	-4.49439
4.669	2.91788	-7.28914	-11.5723	-0.19504	0.631955	7.18185	3.37387	5.46946	1.59729	-3.09359
5.336	0.970969	-0.38877	-3.42809	-1.34807	-0.19091	4.96062	1.00362	5.71588	1.50883	-1.02432
6.003	4.88235	-5.15706	-4.99048	0.884165	1.29987	4.73534	1.77774	3.80041	1.76994	0.371772
6.67	0.258665	0.337041	0.71132	3.57049	-2.2516	5.67513	-0.3984	4.93168	0.098862	9.6831
7.337	1.16992	-0.50502	9.96705	6.24503	0.342279	9.15681	0.40355	6.25846	0.28031	-2.05718
8.004	-1.23192	-7.42027	0.432816	6.7464	0.072416	3.64368	0.187468	4.20273	-1.08964	1.25598
8.671	-0.1687	-11.1732	-2.40111	1.78169	-0.08656	5.83629	-0.58646	5.8794	-1.0909	2.36718
9.338	-1.93632	3.50066	0.277058	-0.72847	-0.59233	4.75444	1.24013	3.08993	1.10478	2.07138
10.005	2.77995	1.60478	4.61452	0.197402	-0.64669	2.43467	-0.36246	5.94497	3.96957	0.134798
10.672	-1.87073	2.88037	1.16365	-1.08508	-5.228	2.1185	1.88646	1.9391	0.331117	1.38368
11.339	1.09557	4.69025	8.98608	-0.13043	-1.49761	1.74636	0.478712	-1.9626	4.14274	4.59194
12.006	0.231179	1.13112	3.34556	0.423267	-1.32945	-3.05932	-1.75373	-0.8466	2.35679	6.24418
12.673	-1.97851	-2.01573	6.59237	3.43773	-0.56701	-3.01551	0.841835	-1.52725	-0.75645	-0.82945
13.34	-4.30292	11.1737	-2.0808	4.1443	0.92568	-3.36135	0.344245	-5.54899	0.104117	-0.32872
14.007	-1.86987	1.71248	-2.28394	0.5203	-0.20423	-5.53974	-2.3691	-3.72705	-3.14941	-0.55244
14.674	-0.71826	4.08995	4.62608	-0.88927	-0.12706	-6.34451	-0.84037	-1.58216	0.13867	-9.11084
15.341	-1.61865	0.865562	-1.04155	0.611607	1.04456	-3.60518	0.34553	-2.06986	-1.29508	-0.35205
16.008	-8.19041	-2.91364	-3.09913	-1.54619	2.0815	-5.92008	-2.71329	-3.07281	-1.05921	-5.4384
16.675	0.316589	-0.57145	-7.96299	-3.15466	-0.24544	-7.80988	-1.8216	-5.48231	-2.727	-2.59153
17.342	2.2884	-10.1226	-2.60777	-2.97137	-1.8179	-6.68562	-4.24519	-6.09921	-1.73333	1.22355
18.009	2.34704	7.80569	0.490458	-3.48497	3.32418	-4.15699	1.17719	-10.5248	-5.05267	-0.71824
18.676	0.840781	1.54171	1.42353	-7.20738	2.50671	-5.83136	0.781571	-8.72015	-3.53125	1.2636
19.343	0.271516	4.28675	5.63746	-5.40389	2.23095	-2.37492	-1.3521	-8.55605	-2.95448	-2.58889
20.01	-3.57895	-7.43978	-4.23992	-6.93134	1.04276	-2.42711	-0.24677	-9.39485	-2.71942	0.063362
20.677	2.2363	21.5861	-1.22671	3.33261	5.92229	8.13443	5.60321	3.19236	5.06992	11.1741
21.344	3.73177	24.793	-5.72329	9.70391	8.64136	16.8664	5.26145	6.55097	6.9967	10.1057
22.011	-1.96577	22.9103	-7.16975	2.7433	0.50094	12.5478	2.60868	0.092408	5.21942	8.28925
22.678	3.72235	20.1045	-1.81454	11.5547	5.9202	19.562	6.82505	7.17295	11.5351	12.1714
23.345	7.1516	35.5416	0.461228	14.0762	8.54416	21.5801	3.34003	5.66531	11.7432	17.4164
24.012	1.77669	16.3514	-2.28693	7.21077	3.16794	16.3356	3.81762	1.12024	5.13305	12.7809
24.679	0.858385	16.4657	-9.92546	13.1558	1.78835	19.2478	4.46645	7.66428	13.2798	13.3593
25.346	4.11679	36.765	-4.02236	15.7934	5.30409	16.7403	6.23241	11.2184	12.589	19.7401
26.013	-2.32654	24.8239	-6.83356	8.75446	2.09457	18.1421	1.51836	6.01634	4.77793	11.0065
26.68	0.981715	24.4742	-2.73669	14.5157	4.76053	20.6575	2.76255	14.8769	10.7493	20.8437
27.347	4.21544	31.8355	-1.17754	21.1103	7.60293	20.5902	4.57477	10.7857	10.6121	18.3599
28.014	-1.65619	20.2819	-7.42033	11.4363	3.00049	13.9923	2.18116	6.60609	7.00001	16.4345
28.681	-1.1572	19.5201	-7.52819	17.5029	6.4514	18.2836	4.80703	12.1156	10.4686	16.2902
29.348	4.09937	28.3411	-9.22904	18.5506	7.79547	16.6194	2.11852	12.5775	11.4521	14.4512
30.015	-3.79189	22.7675	-15.8815	11.8476	4.01814	10.9163	1.48714	9.3063	5.63734	11.6172
30.682	0.035121	18.3325	-6.99905	17.2413	10.1838	11.9078	3.65708	13.3716	12.2825	8.99247
31.349	1.65339	32.125	-14.4017	16.589	8.1393	17.1562	3.0759	16.5984	10.975	9.97166
32.016	-0.10805	16.4104	-15.9082	13.0924	4.44494	13.1795	1.52163	11.0265	4.50088	9.0674
32.683	2.81555	15.7465	-20.2917	15.8417	5.57544	18.4871	5.15543	12.4576	8.42701	12.641
33.35	-0.08878	36.4281	-25.9153	20.8781	9.92065	16.9128	4.11161	14.3439	5.43778	17.0179
34.017	-0.91474	31.9318	-28.9155	12.0228	5.67172	12.0237	2.45015	10.9696	3.70931	8.65786
34.684	1.64753	14.1948	-25.8486	12.8584	10.2831	17.8579	3.30153	14.8925	10.0123	10.8819
35.351	-1.94693	32.8432	-29.4129	19.1992	8.65479	18.3859	4.31152	17.6073	7.72603	20.1721
36.018	-3.7094	30.2334	-30.5403	11.9387	1.89075	12.8877	2.17135	12.1686	2.43449	9.89926
36.685	-0.10878	19.9668	-34.3189	17.124	7.08487	16.1271	6.16901	13.8345	8.08983	12.3229
37.352	1.48991	45.96	-35.7339	18.2034	7.94254	14.9639	6.02994	13.6273	8.02281	22.208
38.019	-7.26666	35.0451	-29.9177	9.22777	5.74035	12.6118	2.26812	13.2847	2.6614	10.5894
38.686	-2.74405	33.886	-37.4309	13.237	8.96228	16.0724	4.31509	15.6658	9.85131	13.4452
39.353	0.955844	43.026	-38.2289	13.1381	8.52112	17.175	4.19576	19.1684	6.16796	20.1901
40.02	-5.21212	29.5065	-29.4926	8.88689	7.77567	9.01352	1.53191	13.7151	1.89546	12.7344
40.687	-3.68161	35.1601	-32.7964	12.0319	5.79323	16.8795	8.94898	18.4917	6.84301	15.3856
41.354	2.35731	41.5181	-29.9878	10.9431	9.43348	20.7913	6.35441	17.9531	7.03056	20.3086
42.021	-2.91744	29.9868	-43.9802	5.80822	3.33472	14.8912	6.23197	18.565	3.02305	13.2247
42.688	-1.54691	14.5922	-38.366	9.43985	8.54077	16.6512	6.68879	24.5016	8.10721	14.0634
43.355	0.774763	28.0392	-27.2699	10.1107	5.90789	16.8296	7.72113	22.6269	9.20147	18.8123
44.022	-8.51592	15.1526	-38.0408	4.03696	3.4323	13.2566	2.78946	21.7216	3.8209	14.0973
44.689	-1.70844	27.4868	-35.1214	8.21077	10.0081	17.5299	4.08461	14.3426	8.12959	18.1911
45.356	1.12099	28.4698	-35.7064	8.07955	9.34782	17.2457	5.75639	21.6091	4.81417	23.4775
46.023	-5.01058	36.0858	-34.2569	0.907529	5.27511	16.6206	3.02666	17.8873	0.793837	16.0597
46.69	-6.06581	25.8197	-25.3276	5.12792	7.41046	20.7033	6.77028	20.9962	4.74608	20.8106
47.357	-0.45834	38.4658	-34.5206	4.5783	6.3148	18.9755	6.87391	20.2368	8.08136	19.1957
48.024	-4.95658	34.6114	-29.6596	0.970427	2.11226	13.4741	2.32701	21.241	-2.07478	15.5344
48.691	2.12973	28.7592	-24.9056	5.36287	3.67782	20.7104	4.03372	11.6685	5.63065	15.571
49.358	-1.32627	38.3462	-26.3859	1.4153	10.2431	19.2314	6.43419	20.1653	4.637	20.015
50.025	-4.9605	30.319	-30.191	-2.04817	2.12475	11.9965	3.40612	18.9219	-0.49353	17.148
50.692	-1.68684	37.3606	-34.5167	-6.48945	1.73218	13.5743	2.61269	15.5413	-1.43639	8.80848
51.359	-5.2639	30.7051	-30.2811	-8.57836	2.21448	20.2248	1.13206	19.0955	-5.22544	9.88632
52.026	-7.30671	25.383	-26.6972	-10.8412	0.822182	28.7712	-1.38521	16.9656	-2.43428	3.5215
52.693	-7.09291	23.85	-39.3518	-11.9537	2.11312	35.9398	-1.10216	14.8483	-6.07724	1.1905
53.36	-7.54984	29.3146	-30.8681	-11.9917	1.12832	44.778	1.08219	14.816	-6.18719	-6.45894
54.027	-5.93763	17.4986	-39.346	-11.7755	3.21342	44.6558	0.088131	11.2994	-7.34665	-2.26648
54.694	-5.54029	21.9215	-31.9495	-12.1217	3.02922	48.2613	1.06658	15.5576	-6.71524	1.06854
55.361	-4.4491	13.7272	-42.4186	-13.3241	1.46943	45.8792	0.699119	14.7674	-3.95871	-10.9901
56.028	-1.92813	14.2903	-37.3707	-14.6749	2.25709	48.3198	1.37666	20.3231	-5.55165	1.58704
56.695	-2.71965	15.7776	-37.7797	-10.4153	2.56208	46.1035	-0.90892	16.0254	-2.55731	0.390355
57.362	2.35196	12.8666	-38.3143	-15.4208	4.00177	45.0162	3.80345	17.5876	-5.88902	0.101753
58.029	0.017895	21.3085	-39.9623	-12.8311	0.398118	48.098	2.52607	14.7133	-6.8289	4.40125
58.696	-4.51238	15.7464	-34.0459	-11.6919	-0.51337	44.9228	2.98887	15.2208	-6.0964	1.80303
59.363	-2.79662	30.1003	-36.6489	-12.6974	3.2089	44.625	2.03168	14.9742	-4.21149	8.35408
60.03	-4.95333	19.7744	-41.2493	-13.1796	0.782911	45.0002	3.62372	12.9525	-5.21631	8.08991
60.697	-3.06513	16.2591	-44.0333	-13.1329	0.558107	45.5144	2.99643	10.2988	-8.90446	8.1119
61.364	0.369198	27.737	-34.5407	-13.0961	3.35858	43.7616	1.34338	13.2117	-7.23254	11.5001
62.031	-3.09152	20.8486	-38.5234	-11.2092	0.878033	43.3657	1.2907	10.8386	-7.13766	13.1064
62.698	-4.13073	22.0402	-37.9795	-12.1024	1.21375	43.9171	1.12669	11.1811	-5.09508	11.6229
63.365	-2.08998	11.2665	-40.8052	-13.0844	2.44802	41.48	2.99986	10.9105	-3.43315	9.25889
64.032	-3.39843	20.0128	-42.2665	-11.253	3.05231	43.3296	4.17728	9.90789	-8.01164	8.99114
64.699	1.39002	13.8976	-40.8535	-10.5033	3.98788	40.7792	3.35004	6.65718	-6.47583	4.71556
65.366	-0.48732	18.6854	-44.4023	-11.782	3.34592	40.7775	1.17033	10.2148	-7.77382	1.57987
66.033	-3.08606	34.2052	-34.9829	-11.8138	4.04444	38.7954	-1.14296	8.56827	-7.34853	13.4093
66.7	-1.95277	18.1949	-34.7127	-11.1195	3.14099	39.4895	3.47681	6.88172	-5.33049	9.31478
67.367	-3.04194	21.1174	-38.0557	-8.79315	3.17942	38.6722	1.77534	10.5	-9.76476	2.92732
68.034	-2.60496	26.6195	-29.4523	-12.1919	2.67272	40.1974	0.408347	7.86706	-4.24261	1.5641
68.701	-2.10777	28.376	-36.4966	-11.388	0.842518	39.8217	2.43332	9.66659	-9.32712	2.08264
69.368	-5.62078	23.5292	-31.5991	-13.9756	1.14488	39.5115	1.64371	7.65081	-6.3775	1.75173
70.035	-0.70583	24.527	-23.5243	-13.5142	1.32961	40.7563	0.868199	10.4926	-5.82119	6.3778
70.702	-0.39775	25.5423	-22.6287	-11.1831	1.75024	41.3883	1.22909	5.62775	-10.1979	9.40073
71.369	-3.85622	25.935	-22.9153	-12.9534	3.59944	42.3522	0.315944	9.93039	-8.13973	8.39393
72.036	-2.18082	31.0815	-23.3328	-13.1036	0.059476	41.6699	0.361458	9.98411	-4.45024	7.14071
72.703	-2.0971	23.6336	-32.8145	-11.6323	2.92525	39.2136	1.37639	9.10068	-7.04921	4.63171
73.37	-3.96615	21.074	-27.7192	-13.5648	5.19224	39.69	0.772366	4.55667	-5.52324	5.9804
74.037	-2.36974	28.1075	-18.7716	-9.83834	4.86571	38.8624	1.13274	5.58516	-7.4039	10.5751
74.704	-5.91494	21.1737	-18.7584	-12.6542	3.98311	38.4062	1.78688	8.11987	-7.31102	6.70882
75.371	-7.42139	22.0573	-28.4746	-10.1693	3.62448	36.9503	2.26353	6.18982	-8.31956	6.69203
76.038	-5.41906	16.6742	-18.8397	-13.5447	3.13364	35.6621	1.28188	8.04676	-8.55419	3.81458
76.705	-3.53136	11.6704	-22.0917	-13.3834	6.55253	36.3037	-0.79704	5.2214	-8.89066	3.51471
77.372	-4.58468	15.2908	-20.0067	-11.5075	0.273039	35.6836	2.14874	10.365	-8.66747	7.80383
78.039	-2.18839	18.545	-17.8236	-12.4806	2.10543	36.9409	1.65104	-2.17692	-6.90767	3.80776
78.706	-4.56303	21.2325	-15.5843	-9.0676	3.40546	39.831	2.30417	8.34157	-5.69072	8.33619
79.373	-3.2511	24.3756	-19.8837	-9.31737	2.62044	37.1899	0.029739	8.71177	-6.81771	5.05241
80.04	-3.43466	14.2122	-25.3704	-13.5295	2.48806	38.8272	1.02821	5.43324	-6.20192	5.41663
80.707	-2.70501	14.5524	-19.6183	-11.249	4.92089	37.203	2.49493	6.98354	-6.14784	1.79501
81.374	-2.69073	15.2374	-21.1924	-11.1489	2.64972	36.3321	1.09648	4.00212	-6.31244	7.41185
82.041	-4.28952	10.178	-18.5041	-14.3587	2.05143	38.5028	1.59063	-0.40157	-8.68843	1.08291
82.708	-4.38387	14.0423	-18.6827	-12.2122	1.19237	34.7283	1.94704	-12.1484	-6.36331	1.04206
83.375	-3.25965	19.8231	-18.6675	-9.74119	3.01177	37.6692	0.647615	-12.4446	-7.78109	3.4682
84.042	-6.82545	16.3483	-18.3553	-10.4695	4.0045	33.7484	2.10963	-6.37912	-9.70011	6.89006
84.709	-6.15337	23.3656	-16.9644	-10.0649	4.6951	35.843	2.56717	-6.05292	-7.62525	0.711375
85.376	-4.29304	8.77348	-20.299	-12.6652	4.17513	32.2741	0.220621	-9.30414	-6.34426	2.04158
86.043	-2.55068	15.0236	-23.3676	-10.0123	4.92382	33.3865	1.06689	-0.93669	-9.5112	4.98839
86.71	-3.42621	17.907	-21.1931	-12.5337	2.67567	34.8335	-2.36856	0.021441	-8.02964	3.94142
87.377	-5.08653	16.5603	-21.5377	-12.9561	1.50877	30.9545	0.792182	1.09518	-5.83073	-2.42955
88.044	-7.38407	14.3226	-23.1105	-11.5976	1.99825	34.2163	-0.03319	3.89121	-7.37772	10.73
88.711	-6.80002	11.6499	-16.9967	-14.8276	4.35783	33.9146	1.03317	2.99785	-7.79281	2.64761
89.378	-6.77552	16.6061	-18.9639	-15.0349	1.74922	35.6073	1.15321	2.95327	-7.3497	2.94426
90.045	-4.37417	10.2257	-20.6357	-8.67528	2.31529	33.8249	0.368108	3.8875	-7.59068	1.42524
90.712	-5.8686	1.02891	-28.6312	-12.7653	1.37398	33.2395	-0.65191	3.74744	-7.21581	2.91242
91.379	-4.25105	8.11393	-35.2108	-12.3679	1.2874	35.6217	-2.05083	-0.73709	-9.01776	5.17018
92.046	-3.06473	9.09707	-29.4176	-12.1759	1.68789	34.4616	1.70211	-1.21168	-6.11978	2.45958
92.713	-4.09885	11.22	-30.7695	-13.2848	0.798424	32.6814	3.20213	1.25353	-5.73211	8.9042
93.38	-7.9548	7.04782	-30.5442	-10.0762	3.17393	34.4121	-1.68571	-4.93879	-7.48755	4.53649
94.047	-7.99946	7.65422	-32.0972	-9.96032	3.1542	33.447	0.85876	-3.42735	-8.12508	0.902515
94.714	-8.77155	10.7616	-44.514	-9.44574	4.18909	32.0078	1.30442	-2.04347	-6.49446	3.88168
95.381	-7.47281	6.9258	-42.4931	-7.79524	2.14293	33.5818	1.37752	-4.76323	-7.40516	1.16492
96.048	-4.59563	5.73142	-39.2216	-11.9	3.98552	30.0498	1.48415	-1.15842	-6.97755	5.26944
96.715	-3.10427	15.9329	-40.697	-12.0035	1.5198	30.4037	0.772024	-3.79514	-9.32272	6.75864
97.382	-7.36206	21.1864	-41.1703	-12.2471	0.958689	30.1602	1.89505	2.04806	-7.42678	9.78811
98.049	-10.5572	7.85311	-43.5125	-11.29	3.87157	30.0569	0.079169	-4.13247	-7.44983	16.0502
98.716	-3.59919	17.7318	-39.5577	-11.3064	2.44426	29.8827	3.11009	1.90449	-6.33931	15.3563
99.383	-2.79118	12.5383	-44.7906	-11.6801	2.36793	31.211	0.601645	-5.80259	-6.66532	13.9534
100.05	-3.99594	10.8706	-39.467	-12.362	0.714375	33.1205	1.60581	-1.07323	-5.42371	4.69514
100.717	-9.52551	-2.50387	-39.2568	-9.30696	3.32612	30.525	1.90508	1.7105	-8.29171	9.53127
101.384	-2.59781	-13.1951	-38.4262	-11.7328	3.36066	32.4029	0.79089	1.79858	-4.38646	8.48354
102.051	-2.86321	-0.05589	-39.9737	-10.718	1.74444	29.858	-0.58324	2.76438	-5.57939	3.13782
102.718	-9.79401	2.44387	-39.5861	-11.5333	1.63662	29.2393	3.18965	6.96876	-4.46527	3.96042
103.385	-9.09839	11.0436	-34.7364	-10.6516	1.59726	31.5011	1.50212	7.09912	-4.84998	-3.41653
104.052	-9.3461	-2.0657	-39.4636	-14.9355	2.63805	30.6946	1.65182	5.53869	-7.05801	-1.19278
104.719	-4.534	-5.73598	-42.8405	-10.504	0.416704	32.0439	2.58444	2.24529	-5.02308	0.850004
105.386	-3.96458	13.4893	-39.8181	-10.8588	0.912594	29.7009	1.91987	2.20584	-7.40712	-0.8125
106.053	-5.89093	0.640694	-38.0116	-11.8781	0.115952	32.3681	5.71912	3.69193	-6.88096	-4.06861
106.72	-11.6009	-2.78507	-43.11	-12.7332	1.44985	29.2672	2.7707	5.27889	-6.79284	-1.81827
107.387	-9.42923	2.36299	-43.687	-14.9479	0.748142	30.7744	3.5838	1.23135	-9.84948	-4.73639
108.054	-8.12593	-3.98702	-41.5318	-13.0113	-0.54096	33.3517	1.59922	2.15421	-6.32643	-2.12186
108.721	-5.48164	12.4212	-40.7418	-12.904	0.070653	31.1139	0.219717	2.63713	-8.15483	2.52802
109.388	-4.09767	13.5328	-46.3036	-12.5025	0.793574	32.195	1.69918	0.190449	-6.7567	-1.52245
110.055	-5.782	9.70955	-39.6974	-15.5462	1.60036	28.7747	1.96439	-0.67283	-9.05377	-6.71514

## Sheet: 2s stim_controls
GCaMP responses of CCHa2R-RA to LED presentation
time (s)	fly1	fly2	fly3	fly4	fly5	fly6	fly7
0.667	6.52296	3.18638	-1.76463	31.288	-10.0022	-6.16145	9.81193
1.334	6.14539	-0.88839	4.31734	32.4998	-0.7227	2.25233	11.2224
2.001	1.89389	4.41955	5.1641	34.2098	0.049148	2.80397	11.0538
2.668	5.369	0.14855	5.33256	29.6074	0.883206	6.64129	9.28128
3.335	3.42989	-6.12083	-2.28285	19.8644	3.63996	4.50671	8.34046
4.002	2.55199	3.54884	1.17743	17.6614	4.20336	5.48276	8.56779
4.669	4.1104	-2.48995	-2.48538	6.39161	-0.02647	5.98871	8.41034
5.336	4.50857	-2.2604	-0.04808	11.1036	-0.67525	2.2831	5.13167
6.003	0.952871	0.505616	1.99619	6.16076	-3.35213	1.57316	8.29599
6.67	2.59487	1.2777	5.66489	6.3637	-2.727	-5.05033	10.2576
7.337	0.157487	-10.2925	4.15783	15.6484	-2.06964	-5.88874	8.39615
8.004	7.54864	-4.4758	-3.37998	12.4283	-3.22052	-9.82738	8.41897
8.671	-1.57474	-9.3615	-1.2715	13.0849	-0.46258	-12.4013	8.01796
9.338	-2.8184	-0.18674	-4.66241	2.34703	1.18614	-9.44478	8.78285
10.005	3.45879	-7.35141	-4.08347	7.64987	-0.08138	-7.56367	4.17955
10.672	-1.64554	-1.85618	-3.74547	-4.17542	-0.74013	-11.2426	4.15886
11.339	3.77616	-4.32473	2.5393	-6.12474	1.58768	-10.9745	-1.23601
12.006	1.44662	-2.00614	4.87107	-3.921	6.97734	-5.01747	-0.97218
12.673	2.3087	5.81753	-0.47315	-3.68842	4.08928	-0.73964	-6.44981
13.34	1.04583	0.545386	-1.36712	-0.47815	5.53979	8.80424	-3.41782
14.007	1.41525	1.3605	-0.14158	-6.33143	1.17762	3.62882	-0.98005
14.674	-3.51516	-0.36616	4.32997	-9.85173	6.21848	9.77386	-3.68886
15.341	0.109288	4.89321	-0.87991	-7.51706	1.02777	8.54055	-11.6394
16.008	-9.06121	2.35393	-4.79491	-16.4296	-5.39745	12.5821	-5.84257
16.675	-7.96657	5.44208	-1.45484	-7.44228	-3.33306	7.84655	-11.4111
17.342	-2.32908	11.8869	1.25856	-8.57681	-1.72084	4.66799	-11.194
18.009	-3.75988	2.7521	0.429266	-12.2171	-1.67959	3.10087	-10.2206
18.676	-3.31487	4.58775	2.3633	-12.0859	-6.52142	3.87774	-15.5653
19.343	-1.18748	-5.36897	1.59817	-16.2666	-6.72466	-4.0698	-10.2632
20.01	-7.95902	-3.19831	0.303759	-18.2878	-1.84588	-0.43922	-11.9447
20.677	32.5183	-8.55632	0.447817	-7.62384	14.5017	-7.45385	-3.12422
21.344	47.5303	-0.43197	-1.85482	84.757	38.8424	5.34579	5.54704
22.011	49.806	-0.94174	-0.79386	102.169	31.7684	-7.40781	0.423133
22.678	40.2239	5.01957	-0.54944	99.5619	33.327	3.80646	-1.73873
23.345	30.625	1.53655	-3.04092	91.9918	22.2252	-4.05565	-6.19806
24.012	23.3793	4.58607	-7.58214	65.0374	7.7349	-7.79856	-10.9354
24.679	13.4436	-0.46901	1.01383	49.9445	-4.01592	-20.8591	-17.586
25.346	1.39654	3.15847	3.88107	38.2171	-9.37272	-17.0462	-11.9838
26.013	-8.54301	-2.23209	0.28628	27.9536	-13.3776	-16.3363	-6.46267
26.68	-19.9156	0.425573	-1.96951	19.8582	-20.7196	-9.29749	-7.93535
27.347	-22.2775	-3.33084	-1.58142	9.85696	-22.8147	-1.41984	-14.7164
28.014	-28.5575	1.01431	-6.81711	15.4199	-18.2684	2.44727	-10.0866
28.681	-31.1355	-2.24733	-1.60371	-2.44269	-15.4805	4.09447	-4.56084
29.348	-29.8411	-10.9584	-1.00427	-14.3595	-15.1564	14.5294	-4.25872
30.015	-36.7417	-5.5055	8.2796	-9.07116	-15.3711	11.5658	-4.68053
30.682	-33.1636	-8.62472	3.21873	-10.4613	-14.2425	11.7985	-6.67153
31.349	-37.1449	2.12828	-7.30261	-19.001	-10.8887	9.13072	-3.96039
32.016	-36.4525	4.02518	-1.33288	-16.8039	-9.15298	26.1766	-3.74958
32.683	-36.7495	-1.60064	-4.30921	-20.6539	-7.4273	22.2225	-3.73222
33.35	-37.3147	-6.39736	-4.86648	-10.4304	-5.70018	17.8418	-6.0477
34.017	-39.4802	0.702907	-0.94614	-18.4701	-5.3042	12.3545	-5.52016
34.684	-40.1766	3.72486	2.61838	-26.9703	-5.96659	11.0609	-11.5104
35.351	-37.3035	-0.76782	4.51528	-23.8673	-8.42351	14.5657	-13.2874
36.018	-35.6068	-0.13371	0.221528	-27.5337	-9.69033	7.61193	-17.3988
36.685	-33.8857	1.03648	1.2275	-30.7677	-10.3501	3.30501	-16.6472
37.352	-33.0853	3.97794	-6.64065	-28.1462	-5.28591	7.91341	-13.9848
38.019	-31.1301	0.141156	1.87979	-36.1641	-8.27481	13.1847	-16.7117
38.686	-37.1175	-8.02212	3.1617	-28.1634	-10.7685	16.5791	-14.3929
39.353	-34.3797	-0.17837	2.65361	-28.8077	-9.53314	22.227	-19.0106
40.02	-31.0563	-8.43997	-4.18091	-34.9578	-8.66592	12.2669	-14.3248
40.687	-30.1665	-1.96125	-0.98144	-28.9373	-2.66924	15.0183	-13.6202
41.354	-29.5686	1.10015	-1.92066	-35.6803	-8.4235	12.4047	-13.8729
42.021	-31.2309	-8.3276	-1.38438	-35.039	-4.2821	14.7757	-17.5542
42.688	-33.3474	-7.9365	-6.04712	-33.6048	-7.74939	7.24599	-16.4002
43.355	-29.5921	-7.56353	0.740452	-35.809	-6.13611	18.1212	-17.4725
44.022	-34.6287	-0.87564	2.91197	-35.8791	-4.54785	16.6554	-19.8431
44.689	-25.4041	2.97192	-1.1886	-31.5741	-5.19664	16.4183	-12.808
45.356	-24.3011	-10.1258	0.714078	-36.4827	-10.6037	16.319	-18.4718
46.023	-28.4689	-12.2313	-0.9188	-29.0122	-7.82913	18.5888	-19.5124
46.69	-33.4037	-7.08403	-1.48056	-27.3704	-4.164	18.5735	-15.4217
47.357	-27.3303	-10.8155	3.15507	-31.5074	-6.44414	18.5181	-7.9481
48.024	-27.1482	-9.0574	8.48391	-32.5667	-5.35268	17.7601	-11.6656
48.691	-25.0718	-8.85742	0.741778	-33.5882	-2.46625	8.53332	-6.80051
49.358	-24.4922	-13.6963	3.79388	-35.0191	0.195413	11.9924	-8.30916
50.025	-24.9713	-9.90649	-1.02054	-29.6157	1.48994	9.59988	-3.11203
50.692	-25.2757	-8.91576	4.48004	-30.0298	3.29525	0.814615	-6.4215
51.359	-20.1708	-12.3652	4.37281	-35.9473	2.39901	5.372	-6.3827
52.026	-23.0457	-7.37611	3.04168	-28.8867	3.22157	-4.25446	-13.0784
52.693	19.2852	-11.3955	4.01299	-7.88897	20.0038	-9.2224	1.94757
53.36	38.1843	1.41931	8.25805	126.477	40.7865	-4.70536	1.59143
54.027	49.4584	6.73943	11.7137	148.465	42.5067	5.3244	8.42628
54.694	42.8306	3.91459	4.55434	148.697	39.632	11.5589	1.08806
55.361	26.5559	4.83495	4.78726	114.2	26.8347	-4.2808	-2.23161
56.028	20.7287	5.23141	6.87751	80.9022	4.82608	-11.0401	-1.22678
56.695	7.40736	1.42487	1.20524	46.8609	-3.2167	-28.56	-5.75417
57.362	-6.30334	0.351786	0.34277	32.5039	-8.59383	-36.2939	-11.7465
58.029	-14.9601	4.9149	-0.70908	7.16975	-19.5356	-28.5365	-12.494
58.696	-21.5379	-2.27322	-4.27134	-9.86759	-19.6724	-24.9299	-10.9031
59.363	-27.4432	3.30385	-1.02034	-14.1734	-24.7425	-5.52115	-11.0672
60.03	-33.0292	-3.32994	-1.80577	-19.1426	-25.6986	-0.35525	-13.7214
60.697	-33.908	-0.25468	4.79622	-28.9289	-25.0888	7.70927	-8.81168
61.364	-37.7783	-0.05796	-2.14624	-30.6778	-24.9687	9.21792	-14.7389
62.031	-37.7471	-7.37655	-2.86145	-41.6574	-26.3593	13.51	-14.6257
62.698	-38.0469	1.56185	-5.51335	-35.5119	-27.3776	14.0097	-13.8677
63.365	-41.0747	-6.51749	-0.31633	-39.3974	-26.5541	17.9871	-16.1751
64.032	-38.3131	-2.41103	-1.18843	-37.433	-28.0106	7.71957	-11.3254
64.699	-36.6241	4.4748	0.873768	-37.1108	-32.2704	7.40308	-15.3722
65.366	-38.5637	-0.80102	2.78552	-35.6226	-28.0205	11.1567	-16.5739
66.033	-42.3055	-0.16099	0.970654	-33.8995	-32.7802	13.6403	-20.2835
66.7	-42.3067	8.08892	8.07393	-30.4971	-30.7186	2.84963	-21.4046
67.367	-41.4015	2.35005	3.7037	-35.7268	-24.1127	13.9061	-29.0229
68.034	-40.8778	5.821	4.3093	-27.0876	-29.709	15.695	-29.9845
68.701	-34.4687	-6.49079	3.64189	-30.1673	-23.9795	8.081	-27.3406
69.368	-38.6113	-5.89702	-4.33358	-29.966	-26.6354	9.47969	-25.6258
70.035	-39.9536	-0.68177	1.97771	-36.3494	-27.4263	19.3565	-23.8028
70.702	-33.2629	-3.19472	-1.26112	-36.0729	-19.488	11.3487	-18.9047
71.369	-35.1252	-4.35247	5.24208	-30.8467	-23.1763	9.5026	-12.9031
72.036	-38.4834	6.17098	1.3384	-38.957	-21.0237	8.69103	-12.9028
72.703	-37.5312	-0.46966	4.77489	-42.0203	-19.5881	14.625	-10.6932
73.37	-34.8446	-3.17343	5.74724	-40.6497	-23.6872	6.90409	-13.3488
74.037	-34.4794	1.3843	0.596622	-33.4438	-18.4013	12.0113	-14.2849
74.704	-37.4875	-5.77545	8.71083	-31.1353	-19.7454	11.5239	-11.7339
75.371	-34.3505	-12.3138	-0.1663	-31.5615	-18.3993	12.7974	-7.17833
76.038	-36.4813	-8.38475	-2.61595	-37.5286	-18.721	8.77075	-10.6223
76.705	-30.2	-5.26691	0.65402	-40.6158	-15.7789	15.1639	-8.02471
77.372	-33.0704	-0.85345	-1.99477	-44.6514	-20.9166	22.9699	-10.4681
78.039	-35.0498	-5.61953	-0.20015	-43.9002	-18.9801	16.2131	-8.71448
78.706	-39.0122	-6.45682	-3.95731	-35.3768	-19.5785	13.6727	-5.9326
79.373	-34.4275	-4.47179	-0.37791	-31.1974	-25.8382	15.6157	-7.39806
80.04	-34.2868	-8.40093	-4.47562	-28.9697	-25.3326	23.3399	-12.7016
80.707	-32.1327	2.42277	-4.32285	-38.7181	-22.3065	30.6236	-7.65387
81.374	-26.4609	-0.58042	-2.10462	-33.5626	-24.1309	24.8391	-5.26622
82.041	-32.0908	0.119919	1.29377	-37.6892	-23.266	26.2018	-11.8268
82.708	-30.5138	-2.73675	-0.96978	-40.9063	-19.6107	17.867	-5.39005
83.375	-33.091	-1.17806	-0.05034	-37.9596	-24.9661	19.5087	-10.5825

## Sheet: 30s stim_controls
GCaMP responses of CCHa2R-RA to LED presentation
time (s)	fly1	fly2	fly3	fly4	fly5	fly6	fly8
0.667	-3.46419	12.1785	1.54395	13.7814	8.82483	-19.3607	2.39246
1.334	-9.47661	14.1391	0.20722	42.5453	10.3156	-13.7736	1.96886
2.001	-6.25147	10.341	1.5329	39.6204	9.53453	-11.1838	4.49831
2.668	-11.3639	5.16991	-2.26147	28.4622	11.103	-9.01443	7.3715
3.335	-13.1655	2.2321	-4.59205	21.5608	9.29388	-10.3584	13.3133
4.002	0.643511	0.057121	0.843524	17.6679	5.49909	-7.63671	11.0012
4.669	5.58268	2.49386	0.680504	9.03405	8.71862	-13.6066	7.38454
5.336	8.99054	1.18133	7.9254	17.8453	9.92564	-10.1849	10.5742
6.003	0.961374	1.46015	4.65359	0.494179	7.7026	-1.0887	13.8869
6.67	6.70139	-2.58247	0.721774	11.6171	6.82041	-1.88131	0.594749
7.337	2.48643	-2.08021	0.082717	17.5206	3.76296	2.06395	-4.25936
8.004	2.42844	6.59086	2.74592	-9.27645	3.54197	6.12175	-2.24008
8.671	0.157969	3.44129	0.030187	12.4139	7.57541	3.52511	3.51154
9.338	2.05297	2.75378	0.089914	1.13192	1.31629	2.37948	-0.86388
10.005	-1.01571	10.9227	2.38975	-1.73315	0.720354	2.8764	0.358906
10.672	0.950255	7.91789	0.644313	3.16362	-3.55721	8.46662	1.40132
11.339	2.96539	6.72427	-2.18588	-15.1232	-7.14097	3.45664	-0.42493
12.006	-1.64997	0.682757	-0.24161	-13.6245	-7.60098	7.19998	3.32631
12.673	-10.0678	1.42435	1.58752	1.96532	-5.51457	3.91026	1.82427
13.34	-4.73926	1.56444	-0.61664	8.22169	-3.48555	3.99236	2.67455
14.007	-2.80705	-7.10303	-4.60283	6.34305	-2.20307	-2.18579	-5.0754
14.674	-2.93356	1.79403	2.05412	-1.04659	-5.92087	2.12964	-7.85163
15.341	-2.40445	-7.52005	-5.90494	-4.99962	-10.3366	0.949576	-10.6576
16.008	0.90656	-8.28346	-6.60723	-16.0625	-2.00148	-1.19969	-7.45773
16.675	0.779876	-3.87763	-0.61745	-5.08151	-2.70466	-6.28254	-11.3043
17.342	0.065473	-5.97182	-0.37892	-2.0023	2.24105	-1.79659	1.09965
18.009	-4.53078	-7.06227	-1.42411	-17.9973	-2.62485	-3.06404	-8.24123
18.676	-5.52423	-4.52791	-1.86962	-20.4715	-4.73356	1.85503	0.738039
19.343	-4.01656	2.75087	-1.10481	-19.2274	-2.06722	-2.33369	-1.53904
20.01	-4.72481	18.1063	-5.10802	-18.4206	-1.47908	0.208757	4.3526
20.677	47.5804	11.2574	7.39949	24.7662	15.9147	-2.16794	5.52366
21.344	56.7523	10.2346	5.3498	155.698	39.6749	-0.74569	20.5657
22.011	58.0339	22.5546	4.30516	183.636	44.7839	-8.50559	17.9945
22.678	65.7095	16.2105	2.75117	189.635	50.6132	-8.40816	17.1524
23.345	57.8888	23.0524	0.474968	181.186	41.4947	-2.06698	18.9051
24.012	49.1201	15.2401	2.43783	169.862	37.9922	1.31666	4.12247
24.679	55.3161	9.55026	0.173911	131.31	22.7351	-8.27415	8.35882
25.346	67.5695	16.1624	1.97656	164.713	41.0945	-10.1351	12.9315
26.013	49.6502	13.7562	0.885808	147.518	30.3335	-2.65877	-0.01622
26.68	52.7843	17.6688	-1.0115	109.771	24.2448	-13.9241	-2.83276
27.347	61.0255	12.9221	3.49257	147.908	32.2784	-8.93459	7.55192
28.014	47.5447	16.2486	-1.76771	147.339	25.2903	-10.1022	-3.44315
28.681	53.4997	17.1727	-2.4992	102.202	19.766	-22.499	-2.7961
29.348	56.8933	24.704	5.45897	130.637	35.309	-11.1613	4.62061
30.015	50.4037	16.3282	3.77676	137.34	28.3943	-13.2703	-6.77692
30.682	53.4464	20.3662	-3.87075	78.3453	18.9746	-20.8411	-1.57585
31.349	54.33	18.4934	0.978976	129.274	30.8498	-5.52859	1.55259
32.016	48.0096	15.7055	3.49163	93.6189	30.2833	-4.11364	-5.58631
32.683	38.3039	11.6982	-0.47772	68.2493	20.4585	-19.8554	-4.14997
33.35	52.836	13.7571	-0.40871	108.829	37.4914	-2.42303	-0.71373
34.017	33.1317	12.3215	-5.69308	96.531	27.0995	5.46507	-4.97343
34.684	34.6712	15.721	5.61031	75.0529	20.2023	-2.81114	-3.93181
35.351	36.6504	15.4965	5.86865	98.7581	33.9147	-0.98563	-0.24556
36.018	31.5911	7.74899	-0.44255	94.7217	28.8127	1.40537	-5.73435
36.685	34.2963	2.75919	-1.3266	49.0675	21.3731	-8.36234	-3.45146
37.352	40.2054	11.6695	2.10444	87.5776	33.1618	-1.73301	6.91114
38.019	26.3421	16.1274	-0.16971	94.0321	23.2257	-3.73146	5.72471
38.686	31.6757	10.2163	-4.49894	56.4234	14.2164	-9.6365	10.1801
39.353	34.4129	9.97925	-0.05982	93.6326	29.3074	3.08249	5.52358
40.02	22.9623	13.6668	-0.34281	85.6777	27.0791	6.67832	-1.32226
40.687	19.2129	6.68583	0.553338	50.4985	16.1287	-7.31691	-3.2363
41.354	27.7191	7.58114	-1.17198	80.4922	31.2174	-0.15959	5.66487
42.021	12.218	4.43788	4.82912	78.4354	21.7311	-2.46982	-2.96122
42.688	14.4212	-4.39186	0.272062	42.5434	16.578	0.763461	0.104548
43.355	18.5245	-5.19385	-0.89963	74.4055	32.2404	7.73596	7.97572
44.022	16.3383	2.123	0.773434	73.7493	23.5385	-3.44476	-9.40905
44.689	10.5994	6.58383	-1.03153	30.6102	16.8156	-12.6183	-4.85194
45.356	20.9728	7.05471	-2.11973	67.0325	25.6751	-2.97185	-3.23334
46.023	12.6385	2.37704	-0.57198	71.9232	18.2478	0.908609	-7.47998
46.69	9.89447	2.08785	-3.27682	44.5342	12.8215	-9.40102	-4.65554
47.357	19.046	8.84514	-3.04391	83.0993	33.3646	4.63091	3.25186
48.024	10.8772	4.35167	-3.62177	72.3826	28.9774	1.81437	-4.81352
48.691	6.95141	9.70613	-7.3463	41.807	21.7252	-12.2276	0.426638
49.358	21.2702	5.74769	0.010518	61.916	34.1671	-3.1906	0.704656
50.025	9.50528	-2.26049	-4.77685	78.8247	24.3928	3.79493	-9.52331
50.692	-0.67315	0.85183	-3.66836	40.0379	10.4912	-4.43442	-15.2292
51.359	-14.9407	3.04239	-1.88094	14.2564	0.176176	-13.0229	-14.5866
52.026	-16.7793	0.490535	2.02821	-11.8284	-8.87756	-22.371	-11.2621
52.693	0.947581	-2.90755	-2.03107	-14.5496	4.79819	-21.2578	-8.05235
53.36	19.4943	1.97782	-5.05105	44.428	20.6874	-11.8121	-0.63356
54.027	36.3297	3.73058	-3.40618	70.8472	30.6857	-9.41183	-0.66043
54.694	30.8217	6.49272	-1.18375	84.3839	27.7476	7.69244	-5.09805
55.361	18.1999	4.27575	-0.79059	55.8348	20.4664	-2.18708	-2.80286
56.028	5.75807	3.0289	-7.41254	23.5325	5.38516	-4.68043	-12.1193
56.695	-8.18695	-3.54644	-5.78126	4.37526	-7.44232	-2.04353	-13.7295
57.362	-10.4006	-7.43916	0.452988	-21.1503	-15.5001	-0.89656	-11.0333
58.029	-20.9719	1.97075	-1.75664	-35.8361	-23.3778	-2.29822	-8.53658
58.696	-29.8466	-2.60785	-4.74836	-40.1273	-23.5746	-1.21041	-12.0627
59.363	-27.8181	-2.32298	-5.95331	-46.0587	-27.9001	-5.60955	-14.971
60.03	-31.3584	-6.69897	0.498997	-43.3147	-23.3395	-8.35969	-13.7053
60.697	-36.1504	1.34183	-1.72173	-39.8737	-22.6366	-5.39932	-13.8624
61.364	-32.0523	-5.50975	-5.46792	-49.7227	-20.2549	-10.8997	-15.8518
62.031	-32.9779	-1.32694	-4.89007	-51.4969	-18.6109	-9.50374	-15.9315
62.698	-36.0514	2.7802	-3.67761	-47.4794	-17.6564	-20.3766	-14.8809
63.365	-40.3364	-2.73853	1.09191	-55.7288	-19.767	-21.9669	-12.3905
64.032	-38.9297	-1.70287	-1.58452	-53.9475	-16.2722	-31.0749	-20.6597
64.699	-37.4607	-5.04106	-2.61044	-54.1158	-14.7254	-36.2641	-17.6713
65.366	-35.152	-6.89016	-6.44493	-54.7437	-10.0862	-42.226	-27.7107
66.033	-38.2798	2.92041	-0.59142	-52.6152	-7.108	-48.0844	-24.6808
66.7	-33.9192	1.26667	-4.5938	-53.6081	-3.08982	-49.8871	-18.1712
67.367	-36.2199	-0.93035	-7.01148	-54.3938	-1.12644	-58.1922	-9.52588
68.034	-40.6531	-4.60054	-8.27392	-53.3098	-2.87608	-54.2185	-19.8638
68.701	-39.9515	-4.1187	-9.59571	-53.158	3.12487	-45.7643	-16.3913
69.368	-38.7276	-10.535	-5.3788	-50.2839	0.482056	-37.4218	-13.6832
70.035	-34.2515	-2.71296	-3.22722	-51.9468	3.09384	-33.3044	-14.6434
70.702	-31.8426	-10.455	-3.52928	-58.4991	-0.22526	-23.6212	-19.8762
71.369	-36.7809	-8.09125	-6.53453	-51.633	-5.46091	-20.1163	-18.7332
72.036	-36.4834	-15.0511	-2.89318	-48.2653	-2.02242	-18.8636	-20.6612
72.703	-36.7452	-3.64764	-1.63491	-49.0368	-4.58765	-20.1435	-18.1312
73.37	-37.1063	-2.04231	-6.66772	-54.5949	-3.62854	-16.5593	-18.7809
74.037	-39.4716	0.790737	-0.97693	-59.6512	-10.9747	-10.3385	-22.0945
74.704	-33.6209	-6.67845	-1.97522	-51.3716	-13.6515	-15.3361	-22.0125
75.371	-35.6482	-4.24668	1.21743	-46.4422	-9.20077	-25.8836	-22.2444
76.038	-36.733	0.259061	1.19187	-38.7517	-8.98882	-22.9193	-18.6564
76.705	-29.3417	-1.32587	-3.55855	-49.0325	-9.78289	-32.4032	-15.8591
77.372	-31.6284	-2.9513	0.603563	-45.563	-6.78333	-34.3882	-15.6978
78.039	-29.5819	-0.31623	-8.25726	-38.3942	-15.1	-39.0383	-16.9122
78.706	-32.3778	-3.65371	-8.61672	-41.2891	-17.3982	-41.2307	-15.6134
79.373	-34.4373	-10.7152	-10.9162	-23.4325	-19.0935	-43.8578	-17.2728
80.04	-35.559	2.78333	-3.6021	-31.6519	-21.7221	-39.3425	-16.8085
80.707	-34.7966	-11.5493	-4.95089	-27.776	-19.5758	-39.7089	-12.8531
81.374	-29.0451	-10.0377	-0.3669	-32.8789	-23.642	-31.7266	-14.6762
82.041	-29.6976	-5.18437	0.072724	-25.2599	-17.3411	-30.6739	-20.3586
82.708	-29.7234	-0.01604	-4.8163	-28.8604	-20.9795	-27.1538	-18.7463
83.375	-30.5489	-10.4659	-1.53081	-28.9225	-15.2559	-24.9983	-11.0581
84.042	-31.6541	-8.25076	-3.44174	-35.6427	-10.3677	-23.3825	-19.6235
84.709	-31.0262	6.39108	-8.96173	-44.289	-16.3269	-24.9222	-12.6183
85.376	-30.7722	-3.93927	-4.60334	-52.3216	-10.295	-33.5032	-15.5714
86.043	-33.0469	-1.06983	-6.80469	-46.4119	-13.32	-39.6078	-9.5299
86.71	-34.4438	3.90356	-0.89821	-41.6724	-14.0183	-38.2818	-6.99825
87.377	-38.0902	5.20778	-2.18493	-32.0865	-13.269	-43.6775	-9.42416
88.044	-34.0575	1.97234	-6.2816	-44.0304	-13.5826	-44.5171	-9.89543
88.711	-32.0487	-3.5679	-8.91794	-29.8747	-16.3517	-44.6416	-17.5376
89.378	-31.6435	-8.3884	-12.6401	-35.327	-13.5414	-40.7668	-11.7456
90.045	-32.1389	0.695091	0.452046	-25.2343	-8.52669	-34.4766	-15.3902
90.712	-30.171	1.20192	-4.95002	-40.2409	-20.6006	-24.0708	-8.46866
91.379	-28.2142	-10.4905	-4.13739	-36.8472	-15.7171	-28.7339	-11.0878
92.046	-24.6099	-9.37028	-3.08144	-27.3445	-16.0551	-19.9991	-8.49862
92.713	-24.8437	-7.94682	-5.63961	-21.051	-19.8296	-18.533	-4.74915
93.38	-23.0259	-0.17074	-5.86856	-29.2132	-16.9953	-16.6759	-8.38829
94.047	-18.1803	-6.95697	-3.26808	-28.3026	-14.0037	-10.2499	-5.0993
94.714	-16.1566	0.573623	-7.32851	-24.1446	-11.7468	-17.8377	-6.85133
95.381	-19.0462	0.142612	-7.05082	-34.5092	-7.2433	-19.0143	-0.53053
96.048	-10.6958	-3.65485	-6.69652	-19.497	-8.12835	-17.9762	-2.75288
96.715	-2.95702	0.782832	-5.71246	-35.4677	-12.1475	-20.9713	-4.67041
97.382	-6.4537	-3.47489	-1.23708	-38.6627	-13.322	-28.4771	-3.09823
98.049	-1.48021	1.98044	-8.90575	-39.9876	-8.99616	-23.9999	-6.15685
98.716	-7.69294	-4.91055	-9.06341	-49.7523	-16.925	-33.7052	-6.50965
99.383	-4.56969	-2.45826	-7.79071	-50.3325	-10.9113	-25.4825	-8.31087
100.05	4.0544	-2.61757	-2.22652	-39.4784	-13.0381	-24.1296	-3.66882
100.717	-3.2215	-2.17465	-8.23401	-42.5054	-14.9729	-19.0361	-5.51144
101.384	-1.11721	-1.44246	-3.70598	-29.0047	-18.6934	-15.0362	-11.6613
102.051	-12.2283	-2.84882	-3.31149	-38.5322	-18.9045	-14.5007	-7.87909
102.718	-5.1037	-6.81402	-6.04343	-33.0556	-18.86	-10.4499	-8.86917
103.385	-10.4154	4.56059	-8.41755	-22.6631	-19.7271	0.130479	-14.037
104.052	-9.16109	-13.1633	-4.67226	-32.1203	-15.0948	-4.39153	-9.88991
104.719	-7.42488	-1.44154	-4.4638	-19.2288	-9.53738	-5.69741	-10.1706
105.386	-7.83358	3.7523	-7.69137	-25.2114	-13.2569	-2.90832	-13.2307
106.053	-9.19541	0.473206	-6.4605	-12.3934	-8.57441	-2.14491	-16.4378
106.72	-17.6838	-0.09297	-8.85554	-20.5038	-8.66478	-12.2715	-22.0738
107.387	-16.1276	6.43332	1.10539	-13.7445	-4.34135	-15.9262	-22.164
108.054	-20.3926	-3.2145	-4.58524	-25.9148	-2.67668	-18.6026	-26.9889
108.721	-21.7798	6.18147	-7.27313	-18.2685	1.46596	-18.3071	-23.3169
109.388	-16.8764	-2.63646	-8.23668	-16.9232	5.22157	-18.065	-24.6816
110.055	-16.3319	-9.3192	-4.51883	-15.8277	3.38153	-19.0994	-26.5107

## Sheet: 2s stim_BiT
GCaMP responses of CCHa2R-RA to optogenetic activation of BiT
time (s)	fly1	fly2	fly3	fly4	fly5
0.667	-8.20231	-4.54831	18.1337	-0.76876	-7.08836
1.334	-16.5013	-2.79448	10.7908	12.4336	-4.30832
2.001	15.2874	1.11643	14.2755	8.87811	-4.88707
2.668	-2.16361	-3.23765	9.23841	0.231802	-6.55894
3.335	-0.57842	1.23327	8.6313	13.4195	2.25283
4.002	7.95255	-6.86984	13.4053	14.9553	-3.50102
4.669	18.8736	-1.21323	4.62332	-7.37816	6.76826
5.336	2.75664	-0.64698	-1.60013	-2.89546	-9.56551
6.003	0.420532	1.56897	12.0747	-13.0406	2.9959
6.67	-6.12318	-4.3806	5.42638	-7.15423	-6.794
7.337	-1.00019	-4.02254	4.14478	-8.09789	-1.55568
8.004	-8.25747	-4.43819	3.16281	-6.04283	7.91103
8.671	7.23976	-0.99787	2.06194	4.62373	3.05739
9.338	10.8018	1.32733	2.77479	0.002769	1.26483
10.005	5.05714	-2.71404	1.95757	-0.31807	-9.47341
10.672	7.57057	2.77301	-3.50373	-2.46709	-8.41657
11.339	-14.9473	3.6326	4.07471	12.0387	-7.25302
12.006	-17.6584	-4.47723	-3.34203	-0.97605	-2.37596
12.673	-18.4471	-1.0212	-0.85999	13.5864	-3.7032
13.34	10.7386	-1.90198	2.16069	3.42481	2.5262
14.007	-19.3972	-3.35743	-2.99741	7.39509	5.48474
14.674	10.3426	5.73072	-3.9718	4.14205	3.59124
15.341	-1.10822	2.77464	-1.66272	-4.98985	-1.33695
16.008	-12.9612	1.12367	-6.18725	-0.07754	0.319812
16.675	5.63349	3.82711	-9.93173	4.44791	7.59976
17.342	-2.04006	5.05644	-8.35151	2.06534	1.17217
18.009	22.6108	10.0493	-6.93923	0.814194	7.03902
18.676	-8.05766	-1.82268	-6.51937	-14.0586	4.24498
19.343	-10.9215	-1.94138	-1.90989	8.06753	-2.58403
20.01	-4.4351	3.15224	-4.62695	8.92261	-12.3905
20.677	-15.0107	-2.31558	16.7176	3.29334	10.8316
21.344	6.1153	-2.18771	15.0089	-5.4012	7.42587
22.011	-12.5832	-2.42296	17.4729	5.00987	7.25345
22.678	-11.9015	3.47838	-0.99051	14.2266	-0.46189
23.345	-6.48733	2.00823	-3.8511	6.74657	3.94081
24.012	-7.96765	3.96983	-11.0016	-18.1833	5.39028
24.679	-33.3844	1.48302	0.296527	-1.57287	0.805617
25.346	6.84613	0.558948	-1.38933	-5.66687	-1.29779
26.013	15.9658	-0.33874	10.8965	-10.6505	-1.45189
26.68	8.64695	10.0731	18.7937	-3.91824	7.12431
27.347	-2.04803	5.85379	13.0326	-0.88639	7.63373
28.014	23.6642	5.08686	19.3063	11.4842	2.81468
28.681	1.73965	2.79862	15.1201	16.9504	1.32333
29.348	18.1692	4.67128	7.23466	4.92607	8.20015
30.015	5.42808	2.17845	11.0015	-2.65569	-0.45815
30.682	19.0816	3.22295	10.7736	7.52095	-4.05508
31.349	25.9635	4.3235	6.54575	8.37825	-0.83807
32.016	7.07943	10.5356	12.0511	-1.2632	-3.54513
32.683	11.6471	3.55574	10.0013	6.12482	-6.21854
33.35	19.2273	3.86098	7.11232	-7.7197	1.20298
34.017	8.7663	5.78313	4.15319	-4.87192	-1.48941
34.684	13.0674	-6.17132	4.31632	-3.84379	-2.43243
35.351	1.78103	-0.30322	5.55789	4.41248	0.035333
36.018	21.7062	-10.343	5.98471	6.89468	2.27682
36.685	-9.54085	-6.41417	9.34292	-2.54041	-6.72274
37.352	25.0877	-8.23403	-0.63623	8.70971	-0.98202
38.019	16.4366	-7.24074	0.471812	5.67764	2.65968
38.686	20.6226	-16.3014	10.0617	11.5167	1.18468
39.353	21.4261	-11.6841	23.3952	14.0889	3.61716
40.02	12.5112	-10.7664	12.0947	1.85327	3.79671
40.687	10.6418	-9.88067	21.536	16.221	-2.61216
41.354	27.2168	-10.2933	12.4232	7.88132	4.91693
42.021	19.9182	-5.96753	10.689	19.8487	-2.03601
42.688	28.5136	-6.3808	14.6923	20.5145	1.59591
43.355	36.9643	-11.0906	13.4895	4.67904	6.12052
44.022	16.0301	-5.96115	5.02896	12.6796	5.73826
44.689	41.8012	-15.4851	13.1976	17.3761	5.75981
45.356	18.9104	-13.7654	13.4454	23.9618	-3.08126
46.023	39.9926	-7.23424	6.94482	13.8475	1.95476
46.69	20.3938	-8.98129	6.99572	18.8925	13.8162
47.357	8.04838	-9.53759	7.20482	3.04639	4.36754
48.024	19.5294	-4.23462	9.41294	27.5389	-2.10162
48.691	6.55644	-7.86248	9.08397	12.3394	4.4617
49.358	37.6845	-11.0027	4.02493	18.6802	13.6256
50.025	34.5333	-13.568	8.14325	14.4064	8.11419
50.692	31.4109	-8.64792	6.48722	19.8969	-4.35748
51.359	41.0803	-12.0132	0.725459	19.1008	14.4228
52.026	26.7229	-7.63479	2.02179	22.0154	3.60405
52.693	34.5911	-7.86362	17.7925	-1.39234	0.821177
53.36	21.9146	-6.25625	15.837	25.4391	7.20906
54.027	16.4665	-0.79025	18.4667	14.3036	12.1225
54.694	14.257	-13.4329	6.75145	9.82195	0.559895
55.361	12.0718	-7.31574	4.24517	20.7667	6.48616
56.028	18.4435	-10.1991	2.72006	19.2045	-0.7476
56.695	11.1425	-9.41834	4.60966	20.7782	2.28157
57.362	0.334163	-4.69625	6.80036	18.4836	-1.22334
58.029	7.16041	-7.03957	5.14158	18.0863	7.38314
58.696	-16.4335	-5.41956	4.88972	13.3916	-7.72656
59.363	5.75174	-8.14451	4.80251	21.4946	-6.78819
60.03	-2.37573	-13.4879	-0.10517	11.5473	0.021093
60.697	0.149811	-5.94672	1.95607	22.1631	6.00554
61.364	-12.7116	-13.3158	5.24995	40.8825	-1.76831
62.031	-10.9288	-11.0271	4.14843	18.4605	1.5469
62.698	-13.8078	-8.98434	0.324266	13.5134	1.14634
63.365	0.365656	-9.57656	0.277505	18.7499	-3.79527
64.032	-3.96337	-9.21217	2.74592	21.6629	-5.23392
64.699	0.42656	-18.6732	-0.2842	32.0065	-3.75626
65.366	-11.9241	-2.24456	-3.96371	22.8225	5.65587
66.033	0.257666	-9.58467	-3.3231	21.6508	3.6393
66.7	-4.70088	-10.1093	-2.02316	35.8847	-5.31225
67.367	-14.525	-5.03344	-5.27575	26.1279	13.6351
68.034	-11.3439	-5.90328	-3.09188	22.0315	10.5814
68.701	-4.57548	-6.88104	-5.67648	26.9673	7.39114
69.368	13.8164	-0.3202	1.03743	16.6999	6.74989
70.035	28.5078	-8.20871	1.9506	28.3684	8.63551
70.702	10.2873	-13.0838	0.776494	39.298	2.31283
71.369	22.065	0.458046	-1.66691	24.6583	3.25481
72.036	29.8051	-3.81068	1.63137	29.4641	4.32081
72.703	40.3571	-9.44984	0.144514	36.9491	6.88773
73.37	9.42508	-9.72033	-6.34664	26.1624	8.52996
74.037	30.9239	-2.00873	-10.7236	11.7401	1.88236
74.704	24.3493	-1.5925	-12.2682	35.2598	0.624976
75.371	4.60299	-3.54314	-19.0917	36.3105	-8.23496
76.038	4.31867	-3.95163	-26.5303	17.8591	0.439245
76.705	28.8282	-0.80686	-22.0387	19.1181	9.14815
77.372	33.4836	-5.28971	-22.3511	24.4453	6.5973
78.039	45.1548	-10.4536	-24.9109	34.4555	-3.57681
78.706	40.0112	-5.7364	-28.7044	22.4602	1.83001
79.373	19.5986	-1.19069	-27.135	20.3628	4.12366
80.04	27.4641	0.373238	-27.688	8.49521	-7.38745
80.707	14.5774	1.96162	-31.0914	27.8692	0.765319
81.374	5.06396	-6.34769	-28.1209	22.6163	-3.49025
82.041	2.2035	-0.86644	-30.4486	26.8089	1.0672
82.708	2.13607	-1.33449	-26.3801	31.355	2.03598
83.375	19.1264	-2.01723	-27.6953	28.4592	10.4347

## Sheet: 30s stim_BiT
GCaMP responses of CCHa2R-RA to optogenetic activation of BiT
time (s)	fly1	fly2	fly3	fly4	fly5
0.667	-12.4595	6.7456	-3.10079	0.731042	7.98182
1.334	-10.6513	4.91325	-3.11724	6.57755	1.6626
2.001	-10.3201	14.7732	3.3345	-2.46459	6.68624
2.668	-3.96906	10.0718	3.51312	-0.46791	4.77967
3.335	-9.96872	-0.58301	-0.03234	-7.94737	2.68241
4.002	-6.34911	9.04839	3.60589	-8.34692	7.779
4.669	-7.15955	1.36004	-1.27612	-8.73959	4.70229
5.336	-2.58425	13.5291	8.82934	5.21767	1.17789
6.003	-9.70138	20.2189	-2.24051	-2.31072	2.56735
6.67	-2.83919	-3.25697	-4.85497	-10.1704	-1.55849
7.337	-4.20013	-2.43222	-3.61999	5.55602	2.50582
8.004	0.629765	-4.36603	-1.12534	-5.71571	-0.79156
8.671	-0.68798	-1.91069	-3.97744	-9.52989	-1.28803
9.338	-9.53648	0.468929	3.25754	-5.4614	-4.53161
10.005	-5.53529	-6.57165	-2.01594	9.97779	7.55049
10.672	4.47674	-0.46497	-0.90585	0.999645	-2.96057
11.339	-2.0415	-7.24307	-5.04722	8.38497	0.5444
12.006	-3.55941	3.63335	-1.80045	5.45327	2.53819
12.673	-1.82427	-3.09466	6.73984	-4.20896	-2.37614
13.34	-9.84418	-5.57439	-1.06087	-2.92398	-3.5519
14.007	-4.85149	-1.92104	-3.9516	-6.14052	-7.74733
14.674	7.38674	4.84858	6.262	-6.70914	-0.29655
15.341	5.56835	-9.83189	1.3316	-0.52039	1.64949
16.008	5.07029	-1.65608	5.56838	-0.85261	-9.29962
16.675	12.319	0.85085	-2.47503	11.1104	6.02725
17.342	16.7362	-4.51129	0.471559	9.55498	-2.4655
18.009	6.0742	-3.77902	-2.93289	4.53186	0.690531
18.676	12.4529	2.65586	1.21805	10.8436	-0.8654
19.343	5.08376	-4.7221	3.59189	11.3308	2.78037
20.01	14.5511	4.1585	2.76452	3.3268	-0.71355
20.677	9.87936	12.3967	9.24365	9.17985	1.64395
21.344	3.16414	4.33251	10.9476	2.69863	3.88118
22.011	6.90601	4.37264	-0.50172	-6.28777	0.282541
22.678	14.4664	7.87755	17.2953	5.90603	7.55024
23.345	10.5664	-2.13467	0.230112	-4.73592	3.96003
24.012	13.618	-13.4537	-2.8874	0.892032	3.01525
24.679	8.46709	-3.08504	10.5394	-6.28724	6.18928
25.346	-0.37805	3.91229	0.807197	7.56488	13.1681
26.013	22.9778	-6.36567	-3.48366	-0.83104	11.1373
26.68	-0.54978	-1.57179	16.7319	3.94811	6.2114
27.347	2.59919	-5.27946	6.28712	2.55601	6.78894
28.014	-4.34285	-7.09885	-6.4584	13.5861	4.68653
28.681	3.25242	-8.70922	18.4018	2.3241	-0.09541
29.348	9.6566	-4.22952	-1.89032	8.09754	-0.0894
30.015	9.23404	-8.08456	-4.74012	-4.35143	9.61513
30.682	-6.31452	5.57741	16.1747	4.58032	11.8018
31.349	3.01107	3.9733	-0.46755	-7.28084	-0.70221
32.016	3.13931	-1.19977	-6.6837	3.94281	-2.6357
32.683	5.14539	-0.58032	11.3137	1.35739	3.69132
33.35	18.5631	5.29585	-3.17673	7.85953	1.63349
34.017	-0.47085	5.06954	-5.76192	-0.56667	6.83517
34.684	-2.69459	10.2634	5.41148	1.55025	1.47008
35.351	-5.73767	0.475994	0.072577	10.8281	5.20825
36.018	-11.6988	1.56809	-6.14542	4.54866	5.17944
36.685	8.1221	6.0221	7.29171	6.9473	5.41437
37.352	-10.6578	0.863448	-2.40695	-4.35925	4.18698
38.019	19.0503	3.82063	-12.9902	5.21671	-0.92338
38.686	10.3972	13.8673	4.04417	14.7528	23.4549
39.353	-1.55061	2.92195	1.4296	7.09949	8.19577
40.02	-1.26764	0.401702	-15.0385	0.644931	2.67523
40.687	-5.55806	8.44236	6.97248	-5.23084	4.15709
41.354	1.95385	4.12607	-7.80849	-13.0405	12.1843
42.021	4.35983	0.267667	-14.6455	5.84251	4.28706
42.688	10.432	3.60091	5.23448	17.4976	9.32289
43.355	-0.93773	-1.401	-4.42541	9.73013	8.87856
44.022	2.09081	-4.13645	-9.08715	4.29607	7.13447
44.689	-4.7153	-1.01877	9.94272	23.7234	5.15568
45.356	-2.83238	4.50056	-9.94217	5.58272	12.2132
46.023	-2.67871	0.349796	-11.7905	-1.45832	5.68325
46.69	3.87954	-2.52075	-1.24327	12.9807	8.40959
47.357	-4.84214	-4.58008	-8.93956	8.65869	13.3574
48.024	-4.71567	-4.11686	-13.8083	19.1853	-2.3751
48.691	-14.5235	4.24077	-2.14608	4.31016	10.9995
49.358	-8.62264	0.422425	-7.04374	17.7292	12.875
50.025	-25.5561	-1.94982	-12.5139	2.65389	-0.50679
50.692	3.25139	-5.13539	-15.196	10.7625	3.55817
51.359	-12.7524	7.21012	-14.4764	15.1255	2.37211
52.026	0.085639	-2.70011	-17.9377	6.83785	-4.72067
52.693	-9.53862	-3.16172	-17.8324	7.46244	6.47899
53.36	0.322037	-5.55502	-16.5179	11.5414	4.72356
54.027	-13.4763	-1.03166	-14.3074	5.10982	2.89612
54.694	-6.7136	-2.62146	-17.4752	13.6223	-4.37947
55.361	-8.53302	-1.32717	-16.8645	10.7274	4.00915
56.028	-6.13197	-4.17202	-19.5183	12.5696	2.72997
56.695	-6.83739	-0.98257	-16.7948	17.0836	7.16526
57.362	-17.3714	-7.18512	-16.4928	10.6908	7.03032
58.029	-10.7128	-2.51094	-17.983	19.0736	2.7608
58.696	-12.7044	0.502922	-20.2787	17.4739	4.40591
59.363	1.89639	-5.07713	-23.3517	13.4219	8.03683
60.03	-13.5592	6.66408	-17.8129	7.39952	5.02427
60.697	-12.1916	-5.79324	-17.343	21.3001	9.7932
61.364	-13.8551	-3.62631	-15.7133	13.3768	6.21086
62.031	-11.96	-4.59389	-17.1206	15.6904	5.47518
62.698	-7.65145	0.255622	-19.7376	13.5198	10.8001
63.365	-6.06299	-8.10194	-22.784	4.05534	1.64691
64.032	-6.47176	0.195525	-17.4479	14.5887	5.58942
64.699	-12.948	-7.15542	-19.9313	6.54319	5.99548
65.366	-10.0269	3.55322	-22.0615	21.9238	9.81697
66.033	-6.94748	-2.82047	-19.0053	19.5164	6.55532
66.7	0.241817	4.11879	-18.4539	12.6538	17.1065
67.367	-7.17155	-4.51445	-19.358	11.9587	7.92821
68.034	-3.92961	4.09599	-17.3019	9.38847	7.20397
68.701	-10.6675	-7.83952	-21.0572	4.98827	5.24102
69.368	-10.9199	2.45067	-23.8935	8.16237	13.7921
70.035	-6.05911	1.32184	-20.4831	10.0165	9.88781
70.702	4.27029	-0.16628	-22.7492	12.3836	13.8738
71.369	-1.15728	-0.97019	-19.9104	9.86019	2.81543
72.036	-11.9643	-11.4761	-25.2229	8.48288	10.0127
72.703	-10.9555	4.67223	-21.6076	8.78877	2.14519
73.37	1.45034	-2.03065	-16.9821	11.3093	5.95339
74.037	0.764783	-3.91103	-29.026	17.9366	8.90932
74.704	7.26884	-3.9848	-19.036	12.423	10.1584
75.371	-4.19699	-1.76472	-19.7657	6.19604	6.15675
76.038	5.57787	2.55752	-20.1606	12.1671	-0.61056
76.705	2.54914	-4.82764	-22.9017	15.4616	0.711913
77.372	2.93881	-3.7054	-21.463	16.9314	-0.08802
78.039	1.03078	4.8399	-19.7366	11.2338	7.24875
78.706	0.055379	-0.40753	-24.1203	16.2092	3.25904
79.373	7.57161	3.46411	-23.3907	3.92715	6.17296
80.04	1.07579	-1.1941	-23.997	12.9947	5.7699
80.707	-1.84991	6.40011	-22.8822	-1.39584	6.92886
81.374	-0.84163	-2.52081	-26.3876	7.97678	8.50294
82.041	-3.30541	1.23686	-26.4554	4.43753	2.90436
82.708	2.61457	5.90005	-21.8535	8.4631	11.1512
83.375	1.80948	-0.11392	-23.9213	9.89321	8.14189
84.042	-4.44021	-5.1961	-23.3838	9.76248	0.121569
84.709	9.72027	-0.21103	-25.0905	14.3724	10.1275
85.376	8.6054	4.05678	-23.6757	7.02107	2.55274
86.043	14.6325	-1.88393	-17.2915	8.60239	0.542366
86.71	3.71129	-2.28211	-21.695	10.459	11.1984
87.377	8.10592	-5.46251	-17.9957	10.8744	3.44743
88.044	19.276	4.52265	-20.2398	18.5873	9.00985
88.711	15.4388	0.761165	-20.4326	5.626	2.09779
89.378	10.5621	-6.05817	-19.9909	14.2866	9.439
90.045	6.43499	-1.45827	-19.544	16.2902	2.75105
90.712	13.1914	-1.10686	-24.2947	9.52246	6.26295
91.379	3.84856	-2.53896	-21.4917	15.0891	6.24772
92.046	14.5585	-1.12071	-24.6938	15.7985	4.88274
92.713	13.2515	-4.11228	-22.5223	14.7662	5.58324
93.38	18.258	-1.41638	-25.6231	16.0824	10.8686
94.047	20.142	2.79832	-22.9913	10.8025	2.03887
94.714	24.1247	-1.84145	-30.7016	15.1253	1.92588
95.381	22.5011	-0.69937	-34.2806	6.40685	4.17982
96.048	4.59658	1.79262	-32.5471	14.3323	9.67488
96.715	20.1485	1.3561	-32.8504	12.3721	15.3174
97.382	16.7803	16.5479	-33.2036	6.73551	13.8566
98.049	14.482	2.12301	-29.989	12.6761	9.01955
98.716	20.3037	2.46149	-30.4319	5.93083	7.44159
99.383	21.5861	2.0105	-28.6224	10.1061	2.23068
100.05	17.4752	-4.62812	-29.8109	5.26831	10.2821
100.717	18.3658	-4.17549	-31.6368	6.49389	5.18818
101.384	18.4574	-4.12379	-33.7811	10.8543	0.183756
102.051	18.9507	3.12645	-33.4436	3.60877	1.53775
102.718	20.4239	-5.8138	-34.0591	14.9795	4.96369
103.385	14.9381	2.78739	-37.2767	10.091	14.818
104.052	23.5019	1.60277	-32.4922	14.2859	2.94044
104.719	18.7817	-6.87944	-35.2874	12.5935	11.7793
105.386	17.6211	-0.94671	-33.1041	10.3047	6.50267
106.053	24.2366	-1.91313	-33.2543	7.81822	-3.60217
106.72	26.5903	-10.09	-32.049	3.37895	1.21024
107.387	8.52788	-6.66608	-33.6112	17.4317	4.03076
108.054	20.732	-1.59109	-30.0011	6.05672	0.776907
108.721	16.897	-13.0326	-33.2489	8.86053	10.338
109.388	9.29408	-7.87125	-32.916	6.0722	9.16678
110.055	13.4932	-2.11014	-31.7576	7.56507	-0.31234
