# Supplementary material for: Hunger- and thirst-sensing neurons modulate a neuroendocrine network to coordinate sugar and water ingestion
Source: eLife. 2023 Sep 21;12:RP88143. doi: 10.7554/eLife.88143 (PMC10513480; doi:10.7554/eLife.88143)
Supplement: Figure 5—source data 1. [file elife-88143-fig5-data1.xlsx]

## Sheet: 2s stim_II
GCaMP responses of CCAP-Gal4 on II to optogenetic activation of ISNs
time	fly1	fly2	fly3	fly4	fly5	fly6	fly7	fly8	fly9	fly10
0.667	0.85452	-2.89328	4.5226	8.36256	4.29654	-8.93014	-10.1301	0.381385	-4.11632	10.7019
1.334	4.31285	0.029573	4.18457	4.12135	1.9086	-4.69302	-9.12777	1.21829	8.597	9.31294
2.001	-2.63574	0.292794	6.7306	4.57532	3.33985	-0.7159	-7.7549	2.06667	6.49011	6.09388
2.668	-7.82295	0.688289	6.46352	3.70946	4.04385	2.73943	-10.1344	1.99376	8.41183	6.35543
3.335	1.48457	0.91189	7.31046	5.13342	4.39743	5.65021	-11.9859	3.75615	4.09579	1.5761
4.002	-3.53622	0.679279	4.52535	3.08244	8.74795	5.89517	-5.60956	4.45508	3.63014	3.78274
4.669	2.28458	0.838019	5.84368	3.32408	5.86778	3.21973	-5.58261	0.939865	3.25504	3.75156
5.336	1.95687	0.209165	4.0925	1.70177	5.15865	2.77057	-6.85952	0.495657	-0.10456	5.03648
6.003	1.92817	1.58271	5.15119	2.26782	7.6388	0.585164	-6.12638	3.63922	1.92803	2.41038
6.67	6.30947	1.06345	6.09858	1.96078	8.24245	1.06609	-2.24309	3.1943	0.242321	0.466326
7.337	3.77536	2.19856	5.64774	1.76225	6.55743	-1.97089	-3.37197	3.27373	1.56921	2.47153
8.004	6.25333	2.21194	2.9486	2.38106	3.66412	-0.13692	-2.48621	2.03231	0.205858	0.145874
8.671	8.11707	1.20567	2.92716	3.25048	2.07162	1.62068	-0.37789	1.79155	-1.88748	-0.13291
9.338	11.5889	1.11437	3.05138	0.623954	-3.44817	0.455076	2.36196	1.21187	0.72972	0.572521
10.005	5.31933	0.072708	3.17693	-0.52888	0.280076	5.16549	1.88287	-1.29644	0.061108	1.88182
10.672	3.82209	1.13649	1.56702	-0.70985	1.58685	4.7927	4.10371	0.111122	0.196999	1.16012
11.339	3.53703	1.6752	-1.38023	-0.89909	0.327996	3.46848	4.51616	-0.90665	0.760184	-2.68983
12.006	-1.55791	2.39351	-0.15379	0.290334	0.662587	1.31699	4.07677	-2.94307	-2.2014	-1.16927
12.673	2.85451	1.87744	-1.32921	-1.73286	0.530549	1.28134	1.31166	-2.79462	0.506465	-3.57479
13.34	-4.2694	1.22866	-3.16533	-0.40982	-0.43154	0.95057	3.17999	-0.66789	4.8871	0.6853
14.007	-4.25712	-0.62182	-1.78779	-1.76427	-2.10985	-0.74419	-1.42478	-1.12391	1.05412	0.655833
14.674	-5.55045	-0.65588	-2.09961	-3.57132	-0.57115	-0.04912	2.06741	-0.60532	-1.71896	-2.38842
15.341	-10.303	-2.94318	-3.28598	-2.17913	-4.71348	-0.59088	3.74119	1.31532	-1.17191	-4.11374
16.008	-4.05254	-1.9108	-5.45141	-2.21603	-7.32201	-4.42379	1.42894	-1.87784	0.030213	-2.1735
16.675	-7.16887	-2.79932	-5.83758	-1.01701	-7.34333	-2.69602	2.17786	-1.58792	-0.14455	-1.80673
17.342	-9.59829	-3.00043	-5.30154	-2.08377	-8.49357	-8.15265	0.992398	-2.2802	-2.9894	-3.26341
18.009	-6.44738	-3.37826	-8.43421	-2.0341	-9.26272	-6.26885	-0.7489	-4.7234	-4.84367	-1.40745
18.676	-1.0055	-4.17749	-6.80344	-1.49883	-7.64102	-7.55474	2.99	-1.65277	-3.99457	-0.30043
19.343	-3.55104	-4.95177	-6.5721	-0.61298	-3.55576	-4.71792	3.22354	-5.25259	-5.34323	-3.66623
20.01	-1.73912	-4.55389	-7.93868	-4.37032	-4.55557	-5.66497	3.6921	-4.39704	-1.98202	-4.37536
20.677	3.79385	-2.92456	3.5032	6.38186	1.69023	5.0104	13.4574	-3.97476	-1.20654	-0.96399
21.344	14.7202	5.99634	18.4652	26.7386	14.3426	17.2996	20.4719	-0.51415	25.2893	10.289
22.011	15.8931	7.42823	30.8325	34.3014	18.1773	18.5711	19.4638	-0.02985	39.2936	20.7688
22.678	11.9483	6.98018	35.0576	32.3997	19.6075	17.5938	14.4755	2.64139	43.4687	27.3544
23.345	6.57753	5.20126	32.2897	29.314	17.4915	12.8561	10.3965	0.637325	38.9665	22.2292
24.012	5.58775	3.62246	24.4079	25.3089	19.5244	8.4126	5.90538	-1.02821	36.1006	19.5222
24.679	4.33294	2.81678	25.6638	21.0731	17.7307	4.10697	4.33156	-2.87819	38.262	14.6993
25.346	1.96477	1.01802	22.5192	19.1301	18.2925	4.56168	1.45515	-1.55614	32.6157	15.4828
26.013	0.727934	0.741448	20.4689	15.663	20.7807	2.16653	1.9857	-0.77359	34.8379	10.2427
26.68	2.30639	1.19047	19.4691	14.3286	16.5245	1.58856	-0.23789	-2.29445	35.867	9.23968
27.347	0.892534	0.366613	16.3905	13.4414	19.1848	2.17398	1.11932	-3.72603	29.7288	7.91926
28.014	1.17683	-0.47836	15.8866	10.2531	15.7358	5.18432	0.212955	-3.26334	32.88	6.61503
28.681	0.425341	-2.52677	14.6122	9.94789	10.5884	8.15431	1.25526	-2.93981	31.1625	7.55962
29.348	-3.60811	-3.39334	12.3874	8.14488	9.2539	3.17477	-3.07822	-2.74194	26.2497	1.3363
30.015	0.882158	-1.8834	12.9209	7.56346	8.61914	2.63499	-2.20018	-3.204	25.1471	-1.83119
30.682	-1.83809	-2.52405	12.6902	5.6547	9.39842	2.56494	-2.47797	-3.30844	25.1476	-1.26895
31.349	-0.01523	-2.74522	13.2657	6.87904	10.3533	2.69434	-0.87583	-4.11716	25.5586	-2.60269
32.016	-7.62066	-0.30918	12.6366	5.51017	8.05885	-1.70911	-5.18944	-2.59734	24.2298	-2.8004
32.683	-9.85271	-0.4894	10.9004	6.12528	9.17989	0.093594	-5.59521	-3.72597	17.172	-1.99671
33.35	-10.499	0.297831	10.1067	3.60178	9.90711	1.70998	-7.90853	-4.31856	20.1315	-1.18195
34.017	-15.7126	-1.83188	8.37234	3.47556	12.2475	0.069814	-11.2652	-3.70518	23.2539	-5.69968
34.684	-10.5944	-2.83776	9.06362	2.30442	11.0073	-1.37402	-11.2704	-4.76319	16.5762	-2.78234
35.351	-13.5263	-1.76216	8.86404	1.50783	9.49964	-3.68368	-11.1987	-4.97539	15.1407	-4.5367
36.018	-12.7755	-2.55404	8.26345	1.2879	11.9498	-5.895	-13.9025	-6.37412	18.1044	-5.66711
36.685	-10.9572	-2.73975	8.45985	1.26455	10.8199	-4.83791	-14.6573	-7.40268	11.5743	-5.19097
37.352	-9.21632	-1.86122	9.0481	0.232205	10.5601	-2.08857	-15.0866	-6.55222	11.7345	-6.22553
38.019	-11.3078	-3.97149	7.10806	-0.89229	11.9224	-1.43324	-13.9787	-5.392	8.09457	-9.99585
38.686	-7.80483	-2.67961	9.0076	-0.69044	4.68106	1.12868	-14.3463	-6.65081	9.33786	-12.4913
39.353	-8.86482	-2.12978	6.25338	-0.48259	1.92363	3.21592	-13.2286	-4.9288	6.94792	-7.35354
40.02	-14.21	-4.89022	5.1206	-2.0271	2.04271	-1.68162	-9.88143	-2.35438	-0.20247	-11.5799
40.687	-10.2444	-4.80858	6.25618	-2.06423	-0.80204	-1.86992	-10.7775	-5.64416	2.14018	-8.67311
41.354	-10.4156	-6.43306	3.13214	-3.01787	-1.02823	-6.49438	-10.1131	-5.12914	-0.13	-8.7672
42.021	-12.6285	-8.41281	1.31333	-1.50032	2.3576	-7.86803	-11.7537	-4.25016	-3.44654	-10.098
42.688	-7.82847	-8.3283	3.28913	-3.62978	1.6344	-7.07319	-11.6196	-6.8409	0.510038	-10.2851
43.355	-8.26916	-7.4082	1.539	-2.95615	2.73957	-0.18897	-11.4655	-7.64394	-1.59484	-10.9549
44.022	-6.16873	-6.49334	-1.78427	-4.69149	4.6719	-0.98572	-10.6214	-3.04364	-5.30336	-8.15518
44.689	-4.36152	-8.78986	-0.33567	-3.8501	5.27975	-1.39041	-10.8855	-2.16209	-2.51187	-5.12982
45.356	1.4456	-9.64516	-2.5119	-4.53157	5.0204	-2.62703	-8.39767	-5.88996	-4.18887	-6.37875
46.023	-11.8251	-7.3283	-2.46274	-7.36863	-0.66009	-5.10131	-7.42342	-6.32943	-2.9154	-5.51573
46.69	-3.38878	-8.06531	-2.61792	-4.32351	-4.18423	-6.98928	-3.65111	-4.93741	-7.8504	-3.39927
47.357	-6.82554	-7.95656	-4.59936	-6.27655	-3.48574	-7.95258	-9.08305	-3.14128	-4.11769	-6.07344
48.024	-9.71845	-6.39927	-2.97165	-3.18383	-2.85583	-8.4131	-11.4269	-4.16663	-4.64486	-7.38826
48.691	-10.4622	-7.06825	-3.4067	-5.17049	-1.07524	-10.3063	-13.6884	-3.75934	-6.19446	-6.13923
49.358	-10.7849	-6.62081	-1.83476	-5.3869	0.215427	-11.8867	-13.1032	-5.65811	-4.00245	-6.305
50.025	-10.3212	-6.48587	-2.67119	-4.76246	-2.93461	-11.8295	-14.7225	-4.3945	2.17434	-5.36888
50.692	-12.9446	-7.24509	-3.98025	-4.23554	0.527283	-13.6685	-16.6935	-4.62106	-3.23058	-6.59838
51.359	-13.4024	-7.30454	-3.88301	-5.61849	0.40157	-11.8116	-16.1875	-3.98492	-2.67333	-5.91811
52.026	-14.5918	-6.38601	-2.77317	-5.13778	0.158491	-11.6453	-13.8276	-4.64923	-4.86186	-4.43792
52.693	-16.4297	-3.97077	5.73141	1.28676	6.10464	1.03342	-5.47328	-1.07716	2.60811	1.39575
53.36	-12.0433	3.33269	21.6623	14.3014	14.6014	13.1168	1.74719	1.4871	29.5558	15.6205
54.027	-6.68021	4.89914	30.154	19.7117	17.0572	10.9596	9.02157	2.38988	38.7557	23.8416
54.694	0.75999	5.99676	30.7904	20.4766	17.9461	13.5078	6.35957	0.050204	39.2072	29.2484
55.361	-2.63246	1.44856	26.7018	16.3176	13.0948	8.73012	2.15383	-2.08704	30.6974	23.9971
56.028	-4.26112	-0.98618	23.6781	12.6623	12.4344	4.40882	-0.48662	-1.39113	27.5208	17.5261
56.695	-8.70293	-0.7851	20.8322	8.27087	13.1865	4.98317	-4.18496	-1.69306	27.0667	13.7801
57.362	-4.94876	-1.92681	20.0252	8.59235	12.811	2.52638	-7.38641	-2.04327	26.9855	15.3069
58.029	-6.29124	-2.80967	18.1024	7.37054	12.5127	1.92318	-7.60643	-5.3656	14.4391	11.9306
58.696	-1.1601	-3.39489	16.3345	4.54096	14.2066	-2.26503	-11.3042	-4.94024	13.6831	7.21224
59.363	-4.74822	-2.90747	13.6608	3.38725	10.7371	-3.83624	-9.41461	-4.87905	15.779	6.57561
60.03	-6.03567	-0.94836	14.1434	3.12678	10.9794	-1.78072	-9.02182	-4.71836	15.1456	7.25626
60.697	-1.95889	-3.71404	12.6848	3.82155	7.9531	-1.55803	-8.74063	-6.09329	17.9755	7.2408
61.364	-4.31675	-4.23674	12.231	3.51006	6.60538	-1.60831	-6.46338	-3.37714	13.1767	1.62237
62.031	-2.59298	-5.88382	12.7056	2.66754	4.36223	1.63367	-6.94938	-4.43989	13.4529	-1.5202
62.698	-2.51184	-5.31151	9.4889	2.81117	4.63807	0.373412	-7.35233	-5.78247	10.8672	0.007041
63.365	-10.2623	-5.69112	10.9677	1.775	4.28089	0.957251	-9.45543	-4.71432	6.84792	-4.65823
64.032	-7.37691	-5.85043	8.4948	0.604836	4.45646	0.313289	-8.39633	-4.71008	5.3152	-1.9748
64.699	-10.6468	-8.31658	8.4243	-1.34877	5.32248	-3.7639	-7.69522	-4.75479	-0.12746	-1.86121
65.366	-5.51113	-8.27698	8.40849	-0.97448	7.64148	-6.07313	-9.78046	-4.96265	-0.80411	-2.12978
66.033	-13.6695	-9.0483	6.5571	-1.47274	5.09056	-6.66057	-9.66214	-5.81655	1.77549	-3.39987
66.7	-3.46876	-7.25507	5.06246	-3.94032	4.28824	-6.8421	-10.1819	-5.15878	1.30521	-4.74217
67.367	-5.44503	-7.71791	3.69053	-1.9939	6.29441	-9.73771	-9.03534	-5.36622	1.19352	-3.32865
68.034	-1.36701	-7.49726	3.08708	-2.637	8.65727	-10.9349	-12.3249	-4.06588	-0.53338	-4.46101
68.701	-6.59316	-6.67462	3.46098	-2.21318	8.4823	-9.46311	-13.3463	-4.5756	-1.1297	-5.05106
69.368	-3.84495	-6.34749	3.63732	-4.6155	7.11181	-14.4202	-15.2916	-4.97112	-0.40901	-8.88904
70.035	-4.88797	-5.31978	3.24512	-4.12962	6.03141	-14.6261	-15.4868	-3.96297	-2.56487	-6.65493
70.702	-6.50477	-5.88171	4.77585	-4.12589	4.9891	-14.1112	-16.7353	-4.39633	-2.17532	-8.08114
71.369	-8.12813	-4.98213	2.88872	-4.87869	1.75742	-14.3336	-16.3555	0.110279	-3.98181	-9.85172
72.036	-10.3296	-3.85706	3.20191	-5.31758	-0.20376	-14.4372	-16.503	-3.77473	-2.52162	-7.64534
72.703	-13.9845	-3.54688	2.77443	-4.81322	-4.58727	-17.8446	-15.9744	-6.54176	-4.68121	-6.59692
73.37	-12.8523	-4.45469	4.48111	-6.96472	-2.11869	-15.4835	-14.7416	-7.66526	-3.32904	-10.5562
74.037	-9.88864	-5.15196	2.86675	-7.14169	-0.26052	-13.2113	-15.1042	-3.16657	-4.29505	-12.0571
74.704	-9.00004	-6.59474	4.33213	-5.52953	0.680256	-14.658	-14.7481	-1.99839	1.74647	-10.3032
75.371	-12.7593	-7.44236	3.2925	-7.62865	2.66482	-13.5252	-11.5515	-5.32725	-0.95534	-12.0776
76.038	-8.74453	-6.69483	1.14505	-6.60176	1.59429	-13.4665	-10.1483	-3.68174	-1.45813	-12.898
76.705	-3.83126	-7.88471	3.16766	-5.12503	2.25876	-12.5031	-12.749	-6.36376	-3.73169	-10.6132
77.372	-7.86244	-8.04237	1.04445	-5.72064	1.16984	-13.6705	-11.917	-5.75963	-4.29912	-13.5829
78.039	-4.03157	-7.4304	2.27868	-2.68306	2.86363	-15.1821	-13.1615	-5.12037	-3.90125	-13.1919
78.706	-4.4944	-6.63421	0.727056	-5.81675	1.86713	-14.2582	-13.3003	-5.35019	-0.02171	-14.0782
79.373	-7.03163	-5.68608	0.207509	-3.90601	-4.37752	-17.2455	-13.9579	-4.24887	-3.2468	-11.1755
80.04	-4.06343	-6.01672	-0.65656	-4.35352	-7.09025	-14.642	-15.3389	-6.06061	-3.92836	-10.8371
80.707	-4.51775	-6.2355	2.00788	-3.8351	-7.41345	-15.7393	-16.5018	-4.12127	-1.80652	-13.0044
81.374	-6.25676	-7.41476	-0.01228	-4.42953	-7.52094	-13.8309	-20.5639	-4.26719	-0.22122	-10.7282
82.041	-7.84981	-6.44157	0.224136	-4.32895	-7.40646	-15.014	-19.4828	-4.68584	-7.48555	-11.4354
82.708	-9.86482	-7.77259	-0.29197	-5.23693	-5.5622	-17.4483	-21.1178	-4.49079	-4.23471	-8.3263
83.375	-7.14188	-9.42991	2.15035	-2.58496	-2.59511	-17.6913	-20.9636	-3.36132	-6.11809	-10.3311

## Sheet: 30s stim_II
GCaMP responses of CCAP-Gal4 on II to optogenetic activation of ISNs
time (s)	fly1	fly2	fly3	fly4	fly5	fly6	fly7	fly8	fly9	fly10
0.667	-7.09897	-2.3506	2.66826	6.71961	-5.31476	-7.90612	2.6476	2.0156	5.45912	10.8032
1.334	-5.70036	-0.66392	2.66645	5.4628	2.63734	-2.76864	1.34844	1.16825	0.896665	7.08612
2.001	-4.49047	0.555254	2.44327	3.47997	4.68854	-0.26552	0.752035	0.904414	1.99445	6.31272
2.668	-9.60603	0.655528	3.59822	2.96375	5.80312	-0.07355	3.92247	3.66468	5.29043	4.24857
3.335	-7.44808	2.62426	1.81485	2.75733	6.07428	-0.71239	1.67683	4.01475	7.28705	4.60161
4.002	-4.66987	2.88585	2.09541	1.74502	7.89144	0.92116	3.18281	3.25047	7.44821	0.95881
4.669	-5.93006	3.83627	4.44225	2.4103	3.39556	1.24784	4.84912	4.2614	6.32861	3.47214
5.336	-2.18187	3.47946	0.2581	1.85816	1.79869	4.41733	2.48717	2.65403	2.87471	4.18851
6.003	-8.45566	2.43037	2.12798	0.508774	1.25113	2.08307	0.823679	3.09256	5.0335	1.9549
6.67	-4.56893	0.798173	2.30305	-0.55514	5.26648	2.91349	1.44406	0.742622	-0.94805	0.756814
7.337	-2.62106	-0.39333	1.95031	0.631578	0.713127	5.81269	4.32338	1.23865	4.77961	1.54101
8.004	-3.23894	1.72171	0.246245	0.927813	1.6343	4.28144	5.74991	1.82641	2.73658	2.83894
8.671	-1.28613	1.75181	-0.26181	-0.89084	0.770663	2.20356	6.11756	1.71579	3.6421	-1.19558
9.338	0.875899	0.572673	0.381311	-0.70791	4.16184	0.319641	8.41974	0.067588	0.473252	-3.06708
10.005	2.54539	-1.49703	0.494124	-0.93571	2.88875	1.00634	6.24006	-0.77732	1.42622	0.876714
10.672	10.1862	-1.2718	-0.6674	0.512101	4.24097	3.02738	1.32991	-1.18846	-3.27344	-0.84059
11.339	5.81708	-1.82234	-0.54062	-1.2511	3.19442	2.93517	0.378044	-0.94298	-1.81058	-0.91457
12.006	-1.89252	-2.13361	-0.272	-1.5387	4.60375	1.35612	-0.71914	-1.45807	-2.70471	0.385742
12.673	-0.03416	-1.70309	-1.19112	-0.95808	2.24117	-0.58323	-0.78566	0.777009	0.371947	1.50212
13.34	-2.041	0.152633	-0.25681	0.202377	1.40451	-2.38998	-2.52706	-1.67959	-3.89814	-0.81985
14.007	1.98288	-0.67717	-2.217	0.337607	-1.04766	-1.84762	-3.24323	-2.75622	-6.36072	-0.67874
14.674	-2.12639	-0.44353	-1.97741	-2.56762	-6.69727	-2.5238	-5.1199	-3.08291	-3.00524	-3.63573
15.341	3.64571	-1.95139	-0.52606	-2.09997	-5.36047	-4.00238	-5.30185	-0.49228	-1.48833	0.91109
16.008	-0.92776	-2.63233	-2.46646	0.408443	-7.00953	-3.42407	-5.25878	-0.47657	-0.37712	0.494896
16.675	2.17823	-0.52133	-1.47752	2.67106	-7.07331	-3.54234	-4.25537	-0.28429	-1.38781	0.112126
17.342	1.95252	-1.13866	-1.7633	-0.65573	-10.054	-5.0422	-5.87137	0.178559	0.258143	-0.68451
18.009	5.07612	-0.65447	-2.08965	-0.66348	-4.84821	-5.83605	-5.6331	-3.01248	-5.49242	-2.35395
18.676	5.71431	-0.78886	1.40838	0.611055	-3.36633	-3.33356	-6.62995	-3.65389	-4.6263	-5.80323
19.343	2.62085	0.876062	-1.83936	-1.89378	-4.35408	-6.60279	-6.58775	-1.69313	-2.50829	-1.72463
20.01	1.86335	1.48737	-1.92739	-1.54291	-6.27022	-7.13599	-8.5291	-2.02701	-3.35041	-5.32065
20.677	3.37725	2.27811	5.46572	2.7286	1.96173	4.45577	-1.35611	-1.11309	-4.74116	-0.28505
21.344	18.4145	8.4232	17.8822	6.36306	12.6826	17.9566	9.94171	1.88611	-1.67056	7.50869
22.011	7.36948	6.10785	21.5175	5.53474	9.90396	16.8143	7.97643	-0.01109	-1.07266	11.3628
22.678	11.3939	5.21096	26.6414	4.6909	14.3151	18.3846	12.5401	1.30614	1.97882	7.48778
23.345	11.9185	6.42496	29.2307	6.69749	16.3278	23.0935	20.1258	0.49584	-2.57354	12.0976
24.012	14.1088	4.39469	27.8343	5.09054	14.4471	20.2971	14.9998	-0.28273	-1.49975	8.66328
24.679	13.2085	1.53708	30.0162	5.62885	19.6935	17.6198	15.96	1.34502	0.804192	16.8449
25.346	13.4764	4.72427	37.7317	5.49588	22.5601	19.7652	17.1039	2.9121	3.14997	22.9184
26.013	13.9832	3.22486	34.2761	3.80121	19.2829	16.8718	12.5078	-1.49828	-2.12056	17.898
26.68	12.5182	2.61033	36.578	4.62247	19.7203	18.3388	14.88	-0.24212	-4.06222	19.8927
27.347	15.0138	5.70903	41.6767	6.54478	23.7605	18.4686	15.9661	-0.31877	-2.14217	33.3503
28.014	17.1287	4.21627	40.8781	5.42856	16.5923	13.0514	8.34135	-0.87125	-3.30531	30.5551
28.681	20.395	2.02325	39.577	5.61811	13.3434	14.6602	12.6732	-0.25743	-1.98399	28.9675
29.348	25.0938	5.82777	41.9011	4.5449	17.0269	19.1289	8.59959	1.05715	3.60327	35.8384
30.015	20.4501	2.55624	42.1584	4.66256	13.3251	17.4783	6.18278	-0.06956	-3.68436	38.2046
30.682	16.9416	1.98715	37.4408	3.44265	15.988	19.326	6.71249	-0.92265	-3.37232	33.041
31.349	14.2548	4.25996	42.7864	4.2481	20.0977	21.8207	7.00294	-1.49261	-1.88111	35.1658
32.016	9.90648	1.75526	37.9197	3.29336	18.5105	14.8046	2.83113	-2.54033	-6.80147	28.6483
32.683	13.6212	1.82262	37.9157	3.59729	19.6547	13.8653	0.91432	-1.52758	-0.47404	26.1682
33.35	19.4831	3.61652	39.046	3.56155	18.8545	18.6801	-0.3977	-0.36365	-4.46048	23.1773
34.017	25.0663	2.29298	37.429	2.25296	13.5435	15.5983	-1.80814	0.164524	-0.10679	28.7496
34.684	18.5845	1.36905	35.9525	0.84633	13.5251	11.9756	0.954631	-1.10349	-2.61096	22.3167
35.351	18.0833	4.66514	42.2633	2.921	15.8291	15.1816	4.30764	-1.61894	-5.22311	25.8313
36.018	15.9823	1.77546	38.6364	1.89488	11.4407	11.5189	-1.12478	-2.87968	-9.13374	29.1832
36.685	10.7389	1.86274	35.4279	1.99431	12.4668	12.8686	0.639138	-4.00903	-9.83755	28.3869
37.352	17.1666	3.06465	39.8822	1.52305	15.5215	14.1152	4.29579	-0.07679	0.127248	39.1162
38.019	17.7768	2.77838	36.6205	0.7748	13.0544	14.4025	2.1561	-2.02678	-3.73631	31.3948
38.686	15.4516	2.54324	37.2586	1.25123	18.3742	12.3089	1.55934	0.385652	-0.83773	27.6863
39.353	23.3607	3.54657	39.1955	1.7193	17.7872	14.1811	-2.57378	-2.73418	-6.34095	34.8766
40.02	18.7342	2.19659	35.1057	-0.54136	17.7706	10.9257	-6.43341	-3.18854	-4.80879	36.1391
40.687	16.7196	0.749621	34.3475	-3.88159	16.5683	11.2331	-4.48613	-3.59923	-7.36853	29.1697
41.354	18.0774	2.28362	35.9627	-2.36689	18.471	11.593	-6.04419	-2.62731	-5.96702	33.1367
42.021	16.2435	-0.85779	34.3278	-1.1979	12.2024	11.4681	-8.33512	-3.80156	-7.09548	26.7028
42.688	20.0846	-0.89364	32.8771	-2.13307	10.3082	11.4744	-4.60851	-2.1628	-8.23748	26.5715
43.355	26.4112	1.25791	38.0841	-0.74379	11.5208	13.0616	-1.0752	-1.39905	-5.39345	30.4463
44.022	20.1087	0.646781	33.4144	-1.99817	10.7518	15.7596	-2.34261	-1.33678	0.537807	30.4751
44.689	20.0042	1.46243	35.0895	-2.86305	10.1321	15.6501	-0.11094	-4.83752	-7.99921	27.5166
45.356	19.2298	3.12537	41.556	-2.26179	11.8884	15.3216	0.411051	-2.94758	-5.01591	25.3439
46.023	18.1496	1.25959	34.3805	-1.51958	9.01452	11.2499	-1.68336	-3.69471	-8.07736	24.963
46.69	13.3925	1.44686	35.3849	-2.38211	12.8454	9.87692	-1.49768	-2.22329	-6.89199	21.433
47.357	23.8975	2.45783	38.1347	-1.18944	15.1124	12.3347	-3.25206	-4.5989	-7.05404	19.4399
48.024	19.0456	0.683473	33.2842	-2.67	13.3476	9.28194	-3.49901	-5.91296	-8.69004	18.9459
48.691	24.787	-0.32859	33.5618	-3.11565	16.0105	9.13687	-3.73276	-4.28695	-7.58959	16.776
49.358	23.8862	2.15392	37.6528	-2.8806	15.7817	9.36732	-5.57574	-0.32196	-6.30633	20.3038
50.025	17.6645	0.247309	36.0826	-1.50108	10.3339	7.96356	-10.9729	-3.04731	-3.22484	18.8087
50.692	19.3408	-0.82831	31.6269	-2.964	5.80009	3.58486	-11.2996	-6.50818	-8.43588	13.1238
51.359	17.1991	-4.42536	25.6803	-2.99043	2.45785	2.85014	-11.6408	-3.18382	-4.10292	14.8214
52.026	16.4533	-3.70947	25.3216	-5.20708	1.0941	3.20158	-12.1508	-6.0054	-8.8558	12.5796
52.693	9.95406	-5.02994	21.8063	-4.96749	2.69497	1.21459	-15.807	-4.54869	-2.9733	12.1425
53.36	8.04342	-4.46008	19.759	-4.91279	0.395127	0.401918	-11.2199	-6.09678	-10.0706	9.52737
54.027	-4.81381	-7.60899	18.1433	-7.80643	1.41081	-0.0662	-11.2051	-6.16602	-7.73129	5.75934
54.694	4.46368	-8.69816	15.7424	-7.36587	-0.31576	-2.10365	-11.1748	-6.88963	-6.98141	3.59485
55.361	0.731145	-10.4546	15.161	-7.75689	0.128241	-4.02699	-10.9977	-6.64842	-9.16681	2.84923
56.028	2.07249	-11.0223	14.784	-7.72264	-1.41401	-6.39965	-15.3057	-5.02945	-11.4289	7.34412
56.695	-6.15881	-11.312	13.3903	-7.88859	-0.94568	-6.72154	-17.6182	-6.68762	-8.94961	1.05258
57.362	-4.04982	-11.4407	12.386	-6.62195	-2.33247	-8.0607	-18.4968	-6.31939	-9.51279	0.06168
58.029	-5.39911	-13.7009	10.5385	-8.04706	-4.61433	-8.3002	-19.0633	-6.44856	-11.8899	0.373213
58.696	-6.41143	-11.4059	12.4672	-8.11528	-11.3891	-10.9452	-15.1584	-6.4024	-8.09958	1.52407
59.363	-9.26205	-11.527	8.78743	-7.69031	-9.98268	-12.2474	-14.9969	-2.42068	-3.58678	1.32639
60.03	-13.8641	-11.4856	6.93833	-9.38397	-9.28003	-14.1022	-17.3989	-3.33412	-5.19618	-1.01216
60.697	-7.51013	-11.9545	7.19093	-9.38916	-8.9965	-12.9716	-17.5108	-3.20052	-5.26543	-2.55598
61.364	-12.4587	-11.6591	7.68277	-8.29945	-11.8122	-12.3823	-17.2049	-5.26184	-6.27821	1.04129
62.031	-10.8009	-12.4243	7.84619	-11.2669	-9.16219	-10.1892	-14.1449	-4.86506	-6.05886	0.750243
62.698	-16.6673	-13.141	5.73067	-9.30114	-8.92586	-12.3223	-15.2556	-4.0977	-1.89396	-3.00834
63.365	-14.9442	-11.3433	5.35383	-8.41846	-8.25069	-14.1681	-14.0083	-5.11675	-6.79353	-5.63154
64.032	-18.6358	-15.3287	5.07821	-8.41659	-4.92935	-15.3174	-12.9569	-4.12563	-4.03447	-2.56385
64.699	-16.8807	-15.2069	6.30585	-9.72133	-6.29037	-15.4386	-15.8719	-4.12131	-5.16906	-2.85809
65.366	-11.2808	-15.6465	3.84378	-8.80896	-8.4136	-14.7975	-16.7111	-6.22143	-7.71097	-4.18767
66.033	-11.1945	-13.4985	5.83965	-10.1131	-11.3468	-15.7066	-16.7299	-6.40233	-10.6766	-3.33729
66.7	-11.4598	-14.344	3.53845	-8.67419	-13.2404	-15.6746	-18.65	-6.39256	-7.96066	-3.30825
67.367	-11.1488	-14.0904	2.50399	-9.33222	-13.1677	-16.9911	-17.1298	-6.8553	-11.3964	-2.30047
68.034	-9.37385	-12.8415	2.56172	-9.08566	-14.5961	-13.9556	-14.681	-5.78116	-8.66803	-2.20013
68.701	-14.2744	-14.4232	3.21897	-9.45627	-14.7127	-16.9555	-14.9625	-4.9456	-7.76275	-1.94121
69.368	-14.1698	-15.4945	2.68273	-8.7912	-13.8964	-17.0518	-15.7315	-6.28938	-10.3743	-4.31049
70.035	-14.2226	-14.53	0.448097	-8.42189	-12.6862	-16.4774	-18.6699	-7.45778	-9.65628	-1.52153
70.702	-11.5194	-15.4753	2.72033	-8.34527	-14.7089	-16.4801	-18.6214	-5.50451	-8.94316	0.079184
71.369	-17.6095	-13.024	1.09556	-8.58754	-17.5855	-17.5334	-18.1197	-8.06148	-10.9474	-5.91462
72.036	-15.7267	-14.4681	0.914983	-9.09062	-15.6083	-16.0828	-16.8996	-4.60151	-3.66005	-2.59305
72.703	-16.6005	-12.845	1.30854	-9.817	-16.5147	-17.2295	-17.7284	-6.97541	-8.94918	-2.04308
73.37	-17.8395	-13.8895	1.16561	-8.16066	-15.7625	-14.3128	-17.8247	-4.35659	-9.28795	-3.63927
74.037	-19.0904	-13.999	0.098028	-9.98935	-15.8295	-15.9127	-16.3625	-6.50674	-9.25528	-4.38913
74.704	-16.4444	-12.9409	-0.65385	-8.40227	-16.6424	-16.0014	-17.2032	-7.05055	-5.71732	0.041095
75.371	-20.8785	-13.4966	0.223169	-8.17133	-15.9883	-18.4486	-15.8721	-3.6369	-3.52559	-4.5694
76.038	-16.9799	-13.2574	-1.95074	-8.01531	-14.7266	-17.7252	-13.8436	-3.25801	-4.31192	-3.04064
76.705	-19.2591	-13.1163	-1.12315	-7.33198	-14.9048	-16.6023	-13.4705	-6.38359	-7.27727	-2.09552
77.372	-13.1555	-12.9215	-0.22863	-6.59598	-13.2198	-18.0125	-13.8062	-4.86382	-7.10911	-1.84083
78.039	-11.3404	-13.5387	-1.05358	-7.03916	-12.5771	-16.1333	-13.3191	-6.05774	-8.04179	0.544748
78.706	-16.3823	-11.3521	-1.08701	-7.35431	-15.3298	-16.8006	-13.3429	-6.2891	-9.41304	-2.14881
79.373	-20.8609	-12.4782	-1.52553	-6.84011	-13.4196	-17.7208	-17.2068	-7.57111	-10.5528	-5.00467
80.04	-16.7995	-13.8265	0.747404	-8.50196	-14.1208	-17.7425	-16.5327	-5.94215	-10.8049	-2.56377
80.707	-20.4671	-13.4417	-1.64806	-5.80354	-13.2811	-14.0408	-18.5488	-6.21138	-10.146	-0.0849
81.374	-18.5612	-12.5735	-2.64733	-5.56564	-14.8957	-13.2185	-1.99727	-7.1069	-8.1877	-5.28637
82.041	-15.4513	-13.2451	-2.90904	-6.90721	-16.2076	-14.5024	-8.4084	-4.38392	-2.43179	-3.05254
82.708	-10.9634	-14.0515	-2.11733	-5.65587	-16.3956	-14.2682	-8.29175	-6.86038	-7.69964	-5.83319
83.375	-10.5758	-13.6477	-2.91338	-6.65246	-16.9644	-14.4143	-7.79457	-8.97269	-10.5877	-3.92896
84.042	-17.9078	-13.1988	-1.58932	-7.1514	-16.3916	-16.7138	-10.572	-6.73009	-9.56146	-5.32089
84.709	-14.7742	-12.7398	-3.25578	-8.24113	-16.3101	-15.1544	-3.86736	-9.05702	-11.7065	-4.60559
85.376	-10.6722	-10.225	-1.43546	-5.03562	-15.2979	-15.9388	-8.8337	-6.37679	-7.73417	-6.68324
86.043	-17.3928	-10.1222	-0.76046	-6.56771	-17.2419	-15.6633	-11.2517	-5.34048	-6.50004	-4.37583
86.71	-15.593	-9.3292	-2.80138	-5.42209	-16.4816	-15.6121	-7.04497	-5.40758	-8.1644	-8.6494
87.377	-11.7259	-9.07092	-2.48828	-7.42479	-15.2217	-15.671	-4.7746	-7.15848	-9.26951	-7.82869
88.044	-19.6392	-6.83788	1.34033	-7.28035	-12.2812	-14.475	-3.89381	-6.39338	-9.3864	-5.84542
88.711	-16.2531	-8.00965	-1.38106	-7.478	-9.95044	-13.6981	-2.68723	-6.36373	-10.1744	-4.50572
89.378	-17.0709	-10.9207	-2.29306	-9.23734	-15.2121	-14.3532	-11.2292	-6.46495	-9.23423	-2.96627
90.045	-14.9897	-11.2757	-1.31863	-7.10544	-18.1835	-11.1874	-13.959	-5.81289	-7.70513	-5.31926
90.712	-17.9293	-11.9298	-1.2032	-7.93727	-18.8428	-15.0955	-10.4773	-4.34373	-5.15938	-7.95614
91.379	-18.3524	-13.6759	0.075189	-6.72726	-19.4314	-14.2168	-5.78173	-8.13284	-8.98098	-7.70675
92.046	-19.7871	-11.8534	-1.05891	-6.66564	-16.9031	-15.1232	-11.8707	-4.53624	-6.34732	-8.57917
92.713	-19.876	-10.3862	0.499377	-7.68414	-15.8148	-16.8367	-10.0847	-6.2814	-6.23521	-9.11004
93.38	-15.6468	-10.7381	-0.42676	-6.82386	-14.3997	-14.4829	-15.4633	-8.67614	-12.0285	-10.118
94.047	-18.9088	-10.9474	-3.28946	-8.5527	-5.61445	-14.9067	-17.2946	-6.97796	-7.84703	-7.66803
94.714	-21.1935	-8.12385	0.286837	-6.18023	-4.49782	-12.6899	-16.6409	-6.76265	-5.80757	-8.32415
95.381	-18.6278	-9.07245	-1.51601	-6.74759	-7.70242	-14.7352	-12.2181	-4.70561	-3.99354	-8.30089
96.048	-17.4382	-10.8181	-3.26398	-5.14364	-8.4172	-13.7366	-9.77048	-7.10945	-8.5771	-8.16649
96.715	-20.496	-11.4796	-2.60305	-6.22697	-8.47508	-15.7212	-8.62865	-3.67667	-3.833	-6.48539
97.382	-19.9029	-11.4257	-3.31957	-5.53079	-10.3111	-16.8796	-7.36939	-4.95359	-7.29539	-10.171
98.049	-20.1317	-11.852	-1.08834	-7.35088	-11.6865	-15.8123	-11.3809	-5.76384	-6.3082	-9.29403
98.716	-15.3309	-12.3431	-1.37624	-5.75756	-13.8884	-17.9088	-17.9726	-5.82833	-7.83986	-9.02639
99.383	-25.2636	-12.7477	-1.92971	-7.45486	-15.5182	-18.6607	-16.3138	-7.46199	-7.00771	-7.53768
100.05	-17.1444	-10.7673	-4.49569	-8.49762	-16.7893	-17.2566	-16.5272	-6.44739	-6.84095	-9.42226
100.717	-20.4826	-12.9191	-4.00307	-7.93767	-17.7	-16.7831	-13.4229	-7.34008	-7.85866	-10.0155
101.384	-22.0758	-12.0266	-2.30404	-6.67862	-15.0182	-16.2049	-9.19977	-8.78801	-11.1623	-7.23532
102.051	-24.9641	-13.9457	-1.22585	-6.06459	-17.2081	-17.2626	-9.46665	-5.36723	-5.67482	-11.9189
102.718	-20.6499	-14.1689	-3.61134	-7.5534	-14.7559	-16.6284	-16.7745	-8.05262	-9.09778	-7.73813
103.385	-21.8143	-13.5884	-5.7787	-5.07937	-15.7284	-21.7004	-18.4268	-9.01178	-9.16418	-9.67595
104.052	-26.4872	-14.9185	-4.80753	-4.80662	-16.6435	-18.5647	-18.5773	-6.9911	-10.1657	-12.2698
104.719	-21.8288	-13.5307	-4.31014	-6.98753	-19.0322	-20.9759	-18.3269	-6.72443	-5.92532	-10.3169
105.386	-18.9826	-12.9076	-4.99927	-8.09633	-19.485	-16.9814	-19.0271	-6.85264	-8.62054	-6.82073
106.053	-20.4038	-13.9304	-6.35934	-5.92707	-19.1929	-18.8181	-18.0838	-9.42139	-9.86368	-7.96398
106.72	-22.9145	-10.6466	-4.78252	-4.84681	-17.3281	-18.5481	-19.5444	-6.92341	-9.71265	-7.01335
107.387	-14.2833	-12.6791	-5.19365	-7.12621	-17.3956	-18.0044	-13.1621	-7.87656	-9.18333	-10.0847
108.054	-19.6363	-9.16626	-3.61048	-8.78473	-16.5028	-17.844	-11.4173	-4.65206	-4.3554	-9.28139
108.721	-20.4402	-9.54718	-6.0044	-7.31736	-16.2066	-18.8804	-11.6952	-6.06446	-5.88469	-7.48562
109.388	-14.9713	-9.48847	-4.92421	-7.76431	-16.815	-18.674	-11.2483	-5.62755	-5.32219	-8.80704
110.055	-20.6555	-9.72598	-5.46978	-6.20686	-16.5077	-18.4061	-18.623	-6.7689	-7.47733	-8.30792

## Sheet: 2s stim_III
GCaMP responses of CCAP-Gal4 on III to optogenetic activation of ISNs
time (s)	fly1	fly2	fly3	fly4	GCaMP responses of CCAP-Gal4 on II to optogenetic activation of ISNs	fly6	fly7	fly8
0.667	-0.91983	-4.93166	0.453463	5.50151	-4.11884	0.032132	5.80345	-8.63804
1.334	-2.21005	-1.38157	1.01721	5.01562	-5.91655	0.098078	10.7277	-2.08174
2.001	-4.16557	-1.89621	3.90148	2.73364	-6.48639	1.21943	10.9008	-4.16718
2.668	-4.25016	-1.57251	4.7426	2.63745	-6.86943	0.650515	8.11912	-4.40295
3.335	-2.81743	-3.47427	1.42417	2.32699	-4.06576	1.42266	5.90614	-6.25012
4.002	-2.06991	-2.1708	1.46673	1.46679	-4.55253	0.207266	5.25678	-6.70824
4.669	-2.23289	-1.01995	1.48578	0.549337	-0.37505	2.13765	4.15071	-4.11518
5.336	-1.92702	-1.24717	3.08949	1.75341	1.03587	1.41924	3.71185	-7.00144
6.003	-1.7366	0.446697	1.73665	1.845	3.577	2.50472	1.62393	-6.37117
6.67	-0.00398	1.01646	1.94772	1.51865	5.00322	2.30253	3.29386	-5.44697
7.337	-2.39446	1.62966	0.714876	1.46824	-0.44405	2.49668	0.478997	-3.93751
8.004	0.177034	1.71766	0.881752	-0.20333	0.153201	0.820821	-0.99777	-1.07017
8.671	-0.36432	-0.10925	0.463979	-0.85635	-5.02029	-0.18494	-0.79299	-2.19169
9.338	-1.30926	-0.26967	0.406812	1.14984	-4.98437	0.412826	-0.14136	-0.14847
10.005	-1.5887	-0.5828	-2.20196	-0.35905	-4.13139	0.787641	-0.88709	0.642626
10.672	-0.19906	-0.7422	-2.70134	0.249519	-0.02007	-0.34596	-1.14879	1.00961
11.339	0.46012	-0.21924	-0.97344	-2.25358	-2.91163	-0.72409	1.48123	0.431833
12.006	1.1661	2.29457	-1.3417	-4.2718	-2.736	0.066224	1.96916	0.575234
12.673	2.00153	4.61193	-4.15743	-1.61223	-0.60492	-0.76621	2.06161	4.15454
13.34	3.19875	4.20636	-2.50859	-0.219	0.751891	1.47297	-0.36592	-1.92163
14.007	2.09174	0.87822	1.07173	1.2057	2.01832	1.4116	-1.16714	2.86375
14.674	2.30912	-0.69835	-1.90982	-0.77402	1.68284	-0.39924	-2.29139	4.55714
15.341	-0.67365	-0.68997	-2.98324	-0.88348	7.68929	-0.0292	-0.42602	2.50303
16.008	2.06654	-1.35761	-0.20852	0.143776	6.46555	-2.10293	-6.32819	2.61934
16.675	-1.95588	-0.43394	1.83485	-0.06672	3.05766	-2.3074	-3.3317	1.05626
17.342	0.082977	-1.45975	0.036553	0.340424	0.046505	-3.10612	-5.11956	4.69812
18.009	0.928175	-2.20346	2.42528	0.246972	0.71335	-2.20466	-0.47238	6.05886
18.676	1.97366	-3.59741	1.42383	-0.4381	-6.41439	-3.8694	-0.55785	7.74215
19.343	-0.65939	-2.83984	3.9603	-0.56012	-9.89527	-3.68928	-2.89092	5.95419
20.01	0.711322	-1.72802	4.94989	1.27114	-11.968	-2.92505	-2.17148	2.98327
20.677	7.10631	4.32698	4.3034	4.79131	-11.2723	3.58968	-1.47164	8.00422
21.344	19.2732	18.8245	15.4191	16.8679	-0.15733	15.11	5.6139	7.54303
22.011	20.2905	19.6438	17.3255	26.604	6.45633	16.575	9.10421	7.35076
22.678	19.6502	20.2815	22.5486	28.7196	9.34826	19.8675	9.28111	6.306
23.345	14.2913	14.0611	19.8312	22.5947	6.55215	17.8014	8.21369	6.91331
24.012	12.0565	12.5032	15.2058	18.8808	3.33733	15.6308	6.64309	11.9995
24.679	12.8427	12.3861	14.6796	15.8885	4.03703	14.1085	5.62236	11.3064
25.346	8.16197	11.3803	16.5282	14.273	0.529262	13.5605	4.53211	12.2847
26.013	10.0732	11.5855	15.6221	12.1251	-2.30782	14.8244	3.04018	11.8476
26.68	8.37087	13.0255	13.7587	10.1467	-2.24094	13.4212	9.11178	12.0855
27.347	7.84658	11.0628	15.503	8.43358	3.69884	11.4515	3.23011	12.9098
28.014	7.36039	10.3311	19.0602	7.97598	-0.57523	12.4765	4.75676	13.2471
28.681	8.14865	9.1357	16.3488	6.69803	3.43804	10.8646	7.77857	13.7154
29.348	8.98503	8.98205	17.8587	5.52637	8.12555	10.1776	4.67138	13.8338
30.015	3.62596	9.1428	18.8738	4.36388	7.85203	8.90439	1.10318	13.388
30.682	6.00972	6.86918	13.9911	4.05836	8.96448	9.53522	4.2726	13.0765
31.349	3.79034	6.13615	13.7405	1.09196	8.21205	9.20554	2.23638	12.4187
32.016	2.30663	4.26985	11.717	-0.32537	6.05765	7.30094	1.78596	11.9657
32.683	0.815043	0.65117	12.8946	-0.17067	6.31252	8.89936	-0.79594	10.9326
33.35	-0.8831	0.327402	8.96587	-1.58132	-0.8715	5.88626	2.62562	9.71061
34.017	-2.12939	-0.39608	7.61998	-1.05097	0.898474	5.73386	1.79851	12.4359
34.684	-4.09198	0.327423	7.5481	-5.26431	-4.26602	2.30026	0.109379	9.47989
35.351	-3.95366	-2.26176	10.6921	-3.55924	-7.0539	2.2332	0.297848	11.6983
36.018	-6.45931	-3.56656	8.16318	-6.0892	-8.70823	0.849851	2.89791	12.4235
36.685	-4.13719	-4.2161	6.26565	-6.36164	-9.83236	-0.51259	2.56508	11.5892
37.352	-6.41912	-5.62533	4.62529	-6.7316	-14.2749	-1.59212	4.21115	11.8036
38.019	-8.03845	-6.38183	5.26557	-4.57911	-11.9525	-3.08828	3.418	10.3163
38.686	-8.91794	-6.12731	9.6236	-7.60853	-13.4685	-1.6185	3.84992	9.21129
39.353	-9.74688	-6.34516	6.12983	-2.97039	-11.7123	-2.89841	2.03842	5.78481
40.02	-10.1343	-5.54351	10.7946	-6.52092	-16.1943	-3.88645	2.27113	4.80545
40.687	-10.6576	-4.7208	6.1095	-7.34884	-14.652	-3.25181	5.13763	5.6589
41.354	-9.05723	-5.27776	10.8913	-7.05784	-15.7926	-3.33647	5.76246	5.10576
42.021	-10.5109	-4.33663	12.4031	-7.48205	-9.27451	-4.22598	2.56156	5.97113
42.688	-8.70096	-7.11324	7.31344	-8.91775	-5.04139	-3.60769	5.88541	3.71577
43.355	-9.48825	-6.68476	12.5725	-8.24797	-2.11156	-5.33394	-0.62172	3.51188
44.022	-8.91832	-6.8798	9.83817	-8.13207	-1.2041	-4.71401	3.4857	4.00151
44.689	-10.3507	-6.84048	12.8614	-8.17382	-0.46099	-7.15199	2.82803	3.20607
45.356	-9.53243	-7.28482	9.62074	-9.2831	1.7716	-4.31093	3.40056	4.50029
46.023	-9.68639	-8.84667	6.42554	-7.7829	0.90815	-6.06648	5.38901	3.89893
46.69	-7.2932	-9.12842	4.97562	-7.97899	-5.28098	-5.98848	1.41436	7.95228
47.357	-7.4812	-10.8222	1.33242	-10.9398	-5.58868	-4.32022	2.57886	4.03194
48.024	-10.3588	-9.30092	8.29643	-9.14198	-7.67126	-4.89249	3.4748	6.13488
48.691	-7.87768	-7.02175	7.08818	-10.4441	-9.31946	-5.00531	2.61192	8.18701
49.358	-5.93367	-7.36678	3.86435	-10.1396	-13.2482	-4.81569	0.294274	5.76618
50.025	-7.05009	-8.44742	5.33222	-9.15234	-5.47678	-7.04791	0.206712	8.45296
50.692	-5.94276	-9.75737	0.613568	-11.4452	-5.02552	-9.5383	-2.60642	9.29803
51.359	-6.16899	-10.8026	-1.65571	-9.57847	1.19273	-6.27825	0.288142	5.04246
52.026	-4.54769	-10.6473	2.70735	-11.2093	-0.6095	-6.73599	0.079791	5.34657
52.693	2.68912	-0.62802	-0.41144	-11.8471	4.44445	-5.41035	1.86546	8.08264
53.36	14.7032	12.1205	10.4093	-1.64517	8.96661	5.52222	7.7455	8.25031
54.027	15.7757	16.635	18.7189	0.55938	13.6537	10.7146	14.7835	4.98907
54.694	14.51	17.1364	24.7653	11.1527	14.2771	13.302	16.5562	7.63486
55.361	8.44646	10.8358	18.8577	8.61292	8.66976	10.2257	9.18964	3.37366
56.028	8.22495	9.05027	14.1161	5.72785	11.5975	9.49346	10.2379	10.0574
56.695	7.41676	7.1964	10.4213	4.7109	9.62523	7.06107	8.42128	11.7842
57.362	7.48123	4.59139	12.8022	-0.72488	5.67128	4.35657	7.01098	11.8068
58.029	6.25252	3.80159	8.98563	1.63309	1.89561	5.48699	7.83109	12.6404
58.696	4.89809	1.51683	8.25392	0.520984	0.570961	3.09475	8.33759	8.12756
59.363	5.81869	1.81229	12.1324	0.218459	-6.57155	3.6922	6.64436	11.4281
60.03	4.37668	2.11127	12.9226	-0.13433	-1.70444	3.56075	7.0643	9.4966
60.697	4.03857	3.72208	11.551	-2.98802	-2.68162	3.66948	5.14877	10.5859
61.364	3.15162	2.25905	7.35669	-0.52173	-5.45377	2.42041	9.65095	9.84053
62.031	1.82133	0.146986	5.27556	-0.78364	-8.46131	-0.41925	10.5749	11.3051
62.698	0.866506	-0.89817	6.0527	-0.05638	-9.3027	-1.24931	7.73958	11.022
63.365	1.1942	-2.3564	8.45751	-4.11912	-6.63286	-2.09251	7.46149	15.5998
64.032	-0.93908	-2.19968	7.89021	-2.99271	-5.9292	-1.24527	6.28197	11.8607
64.699	-4.37465	-4.42754	0.820477	-0.9497	-1.66922	-3.03377	3.32915	10.8768
65.366	-4.51651	-1.84966	4.15144	-4.88038	1.74445	-2.64115	6.60244	8.32028
66.033	-6.87605	-3.51567	1.07413	-1.82196	8.48899	-4.28682	3.93116	9.82462
66.7	-7.14912	-4.99955	2.47896	-4.9913	3.88712	-5.15505	1.99902	5.25149
67.367	-8.7167	-6.88918	4.93258	0.325226	13.9063	-3.21147	3.1525	10.3544
68.034	-9.30085	-7.334	2.40679	-3.85345	10.9863	-5.27039	4.25588	12.2191
68.701	-8.11803	-9.2254	4.27868	-2.63513	10.4315	-4.04762	1.13432	10.4776
69.368	-8.19714	-11.1545	3.76703	-4.93026	10.7087	-7.34925	3.2772	9.77581
70.035	-10.1215	-9.62628	3.17396	-3.99891	10.5395	-6.6634	-0.12271	11.0719
70.702	-12.2423	-9.82114	-0.84379	-2.56389	1.1653	-8.3381	7.37678	11.9027
71.369	-9.00999	-10.5636	3.24369	-6.21733	-0.70647	-7.95718	6.13955	9.1188
72.036	-9.10445	-9.89975	2.60181	-8.12186	-6.18594	-8.55887	5.57693	7.51115
72.703	-11.8795	-12.644	3.27799	-8.41595	-7.6897	-10.0611	3.6997	8.80719
73.37	-10.8417	-11.0055	4.32304	-6.75482	-2.20637	-9.329	2.25427	6.80366
74.037	-13.1704	-10.9736	6.88341	-8.4434	-11.3021	-9.9504	-1.34687	6.32112
74.704	-11.7503	-10.5397	7.70009	-8.62252	-8.11238	-10.181	-1.64451	6.9378
75.371	-10.9381	-8.76348	4.21984	-7.39212	-10.6865	-9.7742	-0.04322	5.97959
76.038	-10.7852	-11.3676	0.326382	-8.55802	-12.7881	-12.8861	-3.2111	4.61395
76.705	-9.44606	-10.9867	4.62674	-7.70684	-13.16	-12.7854	-0.37219	4.32631
77.372	-9.89505	-12.2252	1.1577	-9.62708	-13.8018	-11.254	1.85677	4.18012
78.039	-9.13252	-11.9011	3.40652	-10.549	-16.3012	-12.0088	-0.4172	5.17347
78.706	-9.44965	-13.3474	4.67077	-8.2317	-16.4918	-11.6793	-2.66685	2.15442
79.373	-7.40799	-15.6845	5.1913	-10.56	-17.4099	-10.6249	1.17366	6.1882
80.04	-8.67847	-15.1417	-1.5389	-10.4326	-15.3613	-12.1368	0.28477	6.40946
80.707	-10.3906	-13.6576	6.84978	-10.106	-19.0856	-9.89479	0.281618	5.39247
81.374	-9.56367	-15.1566	1.78274	-9.92252	-17.1931	-11.9487	2.27347	4.79007
82.041	-9.98386	-15.3683	0.278961	-10.7928	-19.9606	-10.9788	1.87999	1.36319
82.708	-10.015	-14.0558	2.10492	-9.4372	-20.7932	-10.6343	5.43576	-1.00567
83.375	-8.37503	-14.4878	5.19096	-10.7763	-20.8867	-11.4485	4.62953	0.511158

## Sheet: 30s stim_III
GCaMP responses of CCAP-Gal4 on III to optogenetic activation of ISNs
time (s)	fly1	fly2	fly3	fly4	fly5	fly6	fly7	fly8
0.667	1.41335	-0.91069	-1.36298	2.93511	16.7443	0.548687	7.12579	0.526297
1.334	1.01704	5.03871	-0.98154	3.49909	6.99708	-1.20155	5.83814	2.33379
2.001	0.148977	4.39684	-0.97332	3.9248	6.51604	1.32444	7.36217	0.771476
2.668	0.401357	4.84115	-1.28857	0.55743	1.34982	0.049573	4.42852	2.29271
3.335	1.74676	4.26196	4.42067	3.82697	2.85698	0.63705	3.0547	1.57431
4.002	1.91685	3.74744	0.848678	3.6355	4.11845	-1.78547	2.98392	-1.95593
4.669	4.65953	3.37715	2.79203	1.9114	-0.73702	1.19936	2.67352	-2.93364
5.336	2.51265	2.02447	0.913516	-1.41122	-1.97999	-0.01213	0.133349	-5.53149
6.003	1.86529	2.47274	1.31985	2.40253	-3.29325	1.18797	-0.54794	-7.64297
6.67	-0.22998	-0.42432	0.702948	0.562845	-2.14736	0.555359	0.779507	-6.66527
7.337	2.43811	-0.09557	-1.91133	0.270875	-0.03729	1.71987	0.374724	-8.14635
8.004	-0.18448	-0.16415	-3.67726	0.318401	0.522962	2.09635	2.12601	-1.72802
8.671	-0.01469	1.43745	3.46166	1.57193	-8.43597	1.37883	0.229745	-1.26358
9.338	0.401274	0.069339	-2.48954	1.99543	-5.03522	1.08952	0.57409	-1.44884
10.005	-1.95197	-0.07717	4.22244	1.70394	-7.8095	0.029284	0.622773	2.53314
10.672	-2.38393	-1.67818	1.24014	1.78471	-7.47023	-0.33696	-0.87712	-1.02819
11.339	-3.04804	-1.71756	-0.72194	-0.06552	-4.30836	0.684104	-0.50713	1.73334
12.006	-1.07581	-3.09856	0.436973	-0.72816	-4.28519	-1.27557	-2.64983	2.91446
12.673	-1.72217	-3.07709	-0.52684	-1.49645	-6.75411	1.33998	-1.97436	3.81757
13.34	-0.47887	-4.05648	4.24832	-1.8563	-1.80835	-1.44322	-3.32892	3.67797
14.007	-1.41859	-3.2702	2.05352	1.10826	2.06128	0.011167	-1.21543	5.31447
14.674	-0.32863	-1.20811	-1.93355	-3.08404	-0.85962	-0.56753	-1.75926	3.24298
15.341	-1.91531	-1.16527	-1.94843	0.825456	3.72155	0.338316	0.331656	3.00215
16.008	-2.11673	0.137267	-3.15662	-0.38075	8.41174	-0.97508	0.004714	0.870898
16.675	3.24244	2.33854	-3.39301	-3.21242	6.86142	-0.5627	3.39374	0.8826
17.342	-1.98755	1.50173	0.751712	-1.70957	7.75629	-2.31393	1.21029	3.70652
18.009	-0.73917	1.6806	-0.19824	-2.59481	10.1503	-1.14206	0.556015	2.97844
18.676	2.5598	1.24595	-3.03504	-1.55204	11.3574	-1.21547	-3.13406	3.66976
19.343	-1.70228	0.572484	-2.70954	-5.87784	12.8955	-3.13465	-2.12257	2.37143
20.01	1.59386	0.921787	-3.02921	-4.82498	6.72751	-1.41271	-2.84917	1.41313
20.677	5.46908	6.81	0.325837	-2.50973	6.68919	-4.042	0.578729	1.15983
21.344	14.3611	20.2692	12.0246	8.28227	12.5295	2.98787	4.95575	-2.52601
22.011	11.3804	20.5778	15.6621	8.62672	12.5024	6.08256	3.55767	-1.15841
22.678	14.8921	20.9734	14.6114	9.10105	17.1587	7.75056	8.29401	-0.38784
23.345	14.6167	27.3656	16.0446	17.3968	13.9893	15.4103	11.1964	-1.82827
24.012	12.8503	24.7367	16.1344	16.5029	14.2877	13.1773	12.6719	-0.69419
24.679	18.1063	24.0003	16.0158	15.1616	14.8631	13.1738	12.3214	1.82779
25.346	12.4031	26.1994	24.1005	15.2048	11.1005	13.2765	14.684	-0.38714
26.013	12.1769	24.6741	19.8723	16.9434	18.1893	15.6758	13.9634	2.96244
26.68	13.9563	23.7119	16.4714	15.4728	8.70471	11.8337	13.0006	5.29191
27.347	14.0114	27.691	21.3558	16.9444	12.5311	9.72384	12.5204	4.07342
28.014	13.2381	21.5256	21.391	22.2019	9.7358	13.6484	13.2059	4.39879
28.681	12.3579	19.9751	18.21	13.3206	14.482	10.2713	13.1203	7.01366
29.348	14.6326	24.7209	21.6561	15.0699	14.7429	12.3593	14.0853	6.22331
30.015	11.1328	22.1415	21.8456	15.2	16.8352	11.533	15.1359	3.33851
30.682	12.6641	19.8557	17.1283	10.1141	18.5558	11.1	11.4495	6.74232
31.349	11.0576	23.1976	19.3831	14.0075	18.2784	10.3994	14.3874	3.8217
32.016	10.1529	18.3081	20.6103	15.6577	21.6121	8.54716	13.3539	6.37325
32.683	13.8679	15.8616	11.9835	11.8571	24.5774	8.93694	10.7722	5.32289
33.35	12.517	22.8047	18.1223	16.2458	24.6381	10.4286	11.8484	4.43397
34.017	9.14627	19.181	20.6915	13.6474	27.6928	11.3461	13.9768	9.53058
34.684	13.8976	16.2248	17.1919	12.9908	32.0874	11.0815	14.7752	9.13856
35.351	11.7195	16.9302	20.3203	14.7036	26.4451	10.3942	16.2824	7.68313
36.018	10.0174	13.8108	18.4746	11.0694	27.8273	8.3125	18.5133	9.04299
36.685	13.7765	11.1177	19.1797	12.0635	24.649	6.56213	15.3576	6.97882
37.352	11.7009	17.8491	19.0415	12.8646	20.7107	7.01694	19.0231	4.83905
38.019	9.57648	16.1743	17.4728	14.5181	21.2223	9.11657	19.4193	6.22134
38.686	9.97552	16.9706	13.4249	6.67118	16.3598	7.27672	15.7277	4.2823
39.353	11.5532	23.0862	14.9091	9.11715	20.9766	9.75344	18.3691	0.614264
40.02	9.18895	18.6053	13.8752	10.845	20.1243	7.30253	14.6764	2.71888
40.687	12.6242	17.6643	16.3368	8.32371	17.7971	4.80344	14.311	0.667796
41.354	13.2716	22.3904	16.5533	8.23125	14.3476	6.51779	15.9975	2.62954
42.021	9.72996	19.6959	17.1385	11.2704	24.9916	7.83476	15.5657	5.10075
42.688	12.2584	16.8589	16.0852	7.07914	13.3595	6.83905	13.1225	5.97709
43.355	14.9401	22.1458	17.8084	10.8116	24.8855	7.49489	13.7469	4.05821
44.022	9.70754	17.8206	19.266	8.15298	21.0978	6.66311	12.5897	6.55186
44.689	13.6782	20.347	12.5456	5.84164	19.6075	6.30232	10.9635	6.73357
45.356	12.72	22.2077	17.973	10.3917	21.7635	9.23539	7.90538	4.89562
46.023	10.1207	18.4511	17.2034	11.5217	25.0043	7.3932	11.8341	6.51232
46.69	12.939	15.9928	14.2042	6.31275	21.5175	8.13707	7.96076	3.77003
47.357	12.578	18.9893	17.2858	11.5944	27.1119	7.93212	10.8232	2.04908
48.024	9.46138	16.8593	10.1158	9.45601	19.7404	8.44739	11.7404	6.95518
48.691	11.2468	13.9584	11.2782	9.48494	21.071	5.20081	8.91158	5.12449
49.358	10.2678	15.7584	13.7806	8.30281	18.4511	8.90345	14.2682	3.12416
50.025	4.57489	13.253	11.7114	8.1414	18.7525	7.42348	16.0809	1.68157
50.692	4.075	11.3552	11.7266	8.85939	10.0856	5.60296	14.6192	3.43727
51.359	4.34485	7.81778	9.54501	5.57067	8.46525	4.64005	9.27686	3.6135
52.026	4.58816	4.95922	9.85436	3.48866	6.72	4.2773	7.86845	3.62699
52.693	2.5985	2.59905	7.93398	2.1316	9.56816	3.67378	8.38177	1.51358
53.36	0.673185	2.53466	6.44571	0.98795	4.93147	3.20067	6.98562	2.07979
54.027	2.28297	2.39009	4.51445	0.921487	4.25648	1.66755	9.05574	3.8283
54.694	0.6534	-0.48019	4.54127	1.08553	0.618092	-0.81473	9.54409	-1.09771
55.361	-0.43178	-2.77499	3.88716	0.133462	-1.11284	0.460973	8.93447	-1.82737
56.028	-1.02321	-4.76465	4.4386	-3.46179	-3.28164	1.48289	4.43339	0.425377
56.695	0.613868	-4.10962	-0.22168	-2.34944	-4.08495	0.530906	3.99929	1.93299
57.362	3.14011	-6.54858	4.09262	-2.81005	-0.49575	0.548106	6.38124	1.19836
58.029	5.39311	-4.9897	-0.42113	-4.7978	0.797853	-0.85609	3.45793	-0.16348
58.696	7.46119	-5.41384	0.952938	-3.60851	1.38818	-1.05456	1.50553	-1.38906
59.363	9.67763	-6.30086	0.266219	-6.29378	0.935796	-2.11832	3.73741	-5.84026
60.03	17.1798	-8.27221	2.71147	-5.81463	4.01323	-2.32732	5.53	-3.38874
60.697	26.6975	-8.69766	0.879421	-5.61054	4.67796	-4.03307	2.70231	-3.63697
61.364	28.1444	-8.96713	0.062354	-6.13884	-0.17174	-2.80648	3.99376	-3.26065
62.031	31.4348	-8.3187	-0.39039	-5.64568	0.515575	-1.52486	1.70998	-1.97976
62.698	30.3179	-9.2764	-0.84646	-6.33741	-4.39028	-3.24337	-1.22449	-1.97276
63.365	34.9054	-7.9339	-0.27059	-9.36471	-5.10704	-4.52812	1.52351	-1.52486
64.032	33.838	-9.8353	-1.32838	-6.89319	-5.86391	-3.19967	8.53874	0.273716
64.699	31.0109	-11.1399	-2.84127	-8.41271	-10.9473	-3.69186	3.75736	-2.89654
65.366	31.8984	-10.274	-1.36532	-7.81702	-11.7946	-5.75535	4.15017	-4.42841
66.033	29.781	-10.5733	-0.08636	-6.47309	-11.526	-3.39995	1.48281	-2.76301
66.7	28.0398	-10.0985	0.973944	-8.57845	-16.578	-6.39771	1.51337	-2.4573
67.367	27.2525	-10.3049	-3.51889	-5.79357	-15.8998	-4.55691	1.5051	-2.97831
68.034	27.6113	-9.55958	0.032939	-7.26438	-18.7283	-4.36383	0.329951	-2.34089
68.701	26.9628	-8.77524	-4.2449	-6.72804	-23.1898	-5.20632	2.1884	-3.02403
69.368	26.1506	-10.2522	-0.77974	-7.04475	-19.1555	-4.38792	0.714797	-4.78225
70.035	24.3182	-10.4582	0.580385	-4.91008	-18.4548	-4.56112	-0.23349	-2.51778
70.702	24.7522	-12.1448	-0.78914	-8.33153	-15.582	-4.7517	-0.65363	-1.95228
71.369	24.0907	-11.4243	-1.00762	-9.97797	-15.1981	-6.01124	5.08155	-2.11561
72.036	23.066	-11.1456	-1.58717	-9.94102	-12.5596	-4.6931	0.261684	-1.65501
72.703	21.9874	-10.7814	-3.60364	-5.57245	-12.006	-6.04755	-1.01889	-1.31871
73.37	22.7753	-10.3524	-6.27384	-7.80045	-2.35142	-4.01923	-1.50267	-2.63422
74.037	23.3441	-10.5814	-3.99202	-8.40171	1.66927	-8.94659	1.84349	-1.0412
74.704	21.467	-10.4356	-5.24173	-8.9363	2.61081	-8.5787	-0.24925	-3.56161
75.371	21.5579	-9.8714	-6.06108	-7.65707	5.29727	-8.56294	2.66858	-4.80968
76.038	21.7645	-11.1402	-2.13821	-8.4997	5.14087	-10.0059	1.35303	-3.93568
76.705	19.5133	-12.0668	-3.31307	-8.86309	1.84882	-8.99908	2.16668	-2.04519
77.372	21.8837	-10.5586	-3.95109	-7.85596	2.93331	-9.80689	4.30404	-4.76587
78.039	20.1523	-9.66959	-5.41446	-7.30772	0.797025	-9.0496	3.44287	-4.65863
78.706	18.358	-11.9093	-7.64269	-5.34853	-6.6542	-7.44459	-0.9868	-3.71509
79.373	19.5246	-11.8304	-5.23019	-5.86428	-7.94563	-8.68919	2.56329	-6.45352
80.04	18.8573	-10.1578	-9.44865	-9.12783	-8.66149	-9.15123	1.46215	-2.83674
80.707	18.6642	-10.3769	-5.06526	-8.40805	-7.62179	-10.8952	-0.77476	-4.48435
81.374	19.8226	-10.5778	-5.91451	-8.76051	-2.06371	-9.25429	4.95705	-4.23834
82.041	17.9472	-9.83639	-2.17473	-8.309	-3.24769	-11.1954	0.523863	-2.15886
82.708	18.4876	-9.44808	-6.49611	-8.55113	2.79784	-9.32094	3.47859	-3.33336
83.375	17.7356	-10.1438	-5.98914	-7.94355	-2.40093	-9.2349	4.46023	-2.6726
84.042	20.714	-10.1781	-5.46385	-5.71721	-2.74939	-6.64977	8.95984	-3.47775
84.709	17.2832	-9.41551	-11.4861	-10.3022	-2.91614	-7.92265	4.31685	-2.61692
85.376	18.7518	-10.2397	-7.26778	-11.0859	-3.7536	-6.25436	4.84532	-1.34147
86.043	18.3486	-11.5372	-4.7365	-10.8235	-4.05703	-9.73324	2.31612	-2.85956
86.71	17.4452	-11.3145	-4.66421	-10.6938	-5.27918	-8.64103	0.572725	-4.62777
87.377	18.109	-11.3225	-5.99065	-11.4558	-4.03232	-9.61518	4.98097	-3.12243
88.044	19.7109	-10.1764	-7.70607	-10.3954	-7.23206	-8.46144	2.91952	-5.76633
88.711	15.2988	-10.4261	-4.7154	-10.8749	-1.64107	-7.5779	1.91174	-3.30955
89.378	17.2685	-11.496	-4.73657	-10.931	0.702403	-6.54504	1.82605	-1.53975
90.045	17.0779	-10.0878	-2.41044	-10.7344	4.87401	-8.60839	0.819265	-6.76165
90.712	16.2929	-10.4875	-4.55016	-8.57648	1.5944	-12.3586	2.67403	-2.65851
91.379	18.303	-12.1549	-4.51853	-11.1311	0.84017	-11.5216	2.23367	-3.78429
92.046	17.9517	-13.2032	-5.6733	-9.48406	-5.54322	-11.0213	2.91542	-2.87483
92.713	15.7891	-12.2759	-3.39466	-10.9903	-10.1543	-9.36517	3.49857	-1.51235
93.38	16.5072	-9.86594	-6.9594	-10.8209	-9.21975	-8.31784	1.64264	-3.38536
94.047	16.7738	-9.92917	-0.13291	-9.7422	-6.41739	-8.70472	2.30224	-3.46142
94.714	16.7635	-9.27279	-3.89285	-10.1353	-12.3636	-9.73128	1.8685	-4.19467
95.381	13.1245	-7.34526	-3.05356	-8.12536	-12.7495	-9.68092	1.07696	-2.50768
96.048	16.687	-4.36367	-2.89629	-10.2404	-10.2348	-10.3683	4.7968	-2.10872
96.715	16.1943	-5.04481	0.571662	-10.6676	-7.07231	-9.09073	3.16098	-3.40628
97.382	17.1675	-6.25821	-2.31963	-8.21734	-8.15535	-7.69899	3.12736	-3.89643
98.049	16.5398	-6.19842	-4.79886	-10.0464	-9.36441	-9.4028	-3.77569	-4.55724
98.716	17.0671	-8.52545	-4.72629	-11.5672	-14.9395	-6.9218	-0.70377	-1.42008
99.383	17.3225	-7.85037	-5.09934	-10.4286	-10.7885	-11.709	1.25272	-6.99792
100.05	17.2423	-7.86772	-4.19786	-12.38	-12.1893	-9.82661	-3.91108	-7.67723
100.717	12.6689	-9.23148	-6.03598	-11.4084	-10.5856	-9.3846	-3.49907	-10.4765
101.384	13.4796	-8.53838	-6.84877	-9.64963	-12.3636	-7.16078	0.011171	-10.5204
102.051	12.3866	-11.4347	-3.43394	-7.96151	-9.64324	-9.03866	1.41977	-8.30294
102.718	11.797	-9.54279	-4.7679	-9.48212	-14.3942	-9.78983	-0.48069	-10.2616
103.385	13.153	-10.7425	-3.36988	-9.86606	-11.2435	-7.61716	0.671945	-7.33924
104.052	13.9976	-12.2159	-2.44797	-8.71367	-16.9683	-8.02402	6.68314	-7.31367
104.719	15.2178	-12.3486	-6.30576	-8.6645	-16.4491	-6.95638	3.44691	-6.36144
105.386	10.3472	-11.1229	-1.3664	-10.2493	-11.0688	-8.01245	2.57588	-9.03441
106.053	12.6937	-11.0869	-0.77105	-9.88545	-5.04578	-9.32901	1.95152	-5.50005
106.72	12.4109	-10.9177	-0.28966	-10.0997	-7.66359	-7.2818	1.88987	-3.89419
107.387	13.3225	-12.5192	-0.18151	-10.7009	-1.34292	-7.65153	0.221903	-5.55637
108.054	12.2253	-11.6196	-2.09035	-8.52414	-1.25809	-8.21472	0.4477	-6.70121
108.721	14.2909	-11.089	0.655059	-13.7373	-1.89278	-8.36694	0.536504	-2.55225
109.388	13.8947	-9.98668	-2.15312	-10.817	-1.83069	-8.81328	-1.05125	-4.39404
110.055	14.17	-11.0199	-5.23601	-10.344	-3.68822	-8.86236	0.083418	-3.39001
