# Supplementary material for: Hunger- and thirst-sensing neurons modulate a neuroendocrine network to coordinate sugar and water ingestion
Source: eLife journal article supplement (doi:10.7554/elife.88143), 2023-06-15
Supplement: figures [file elife-88143-figures-v1.pdf]

---

## Figures and figure supplements

Hunger- and thirst-sensing neurons modulate a neuroendocrine network to coordinate sugar and water ingestion

**Amanda J González Segarra et al.**

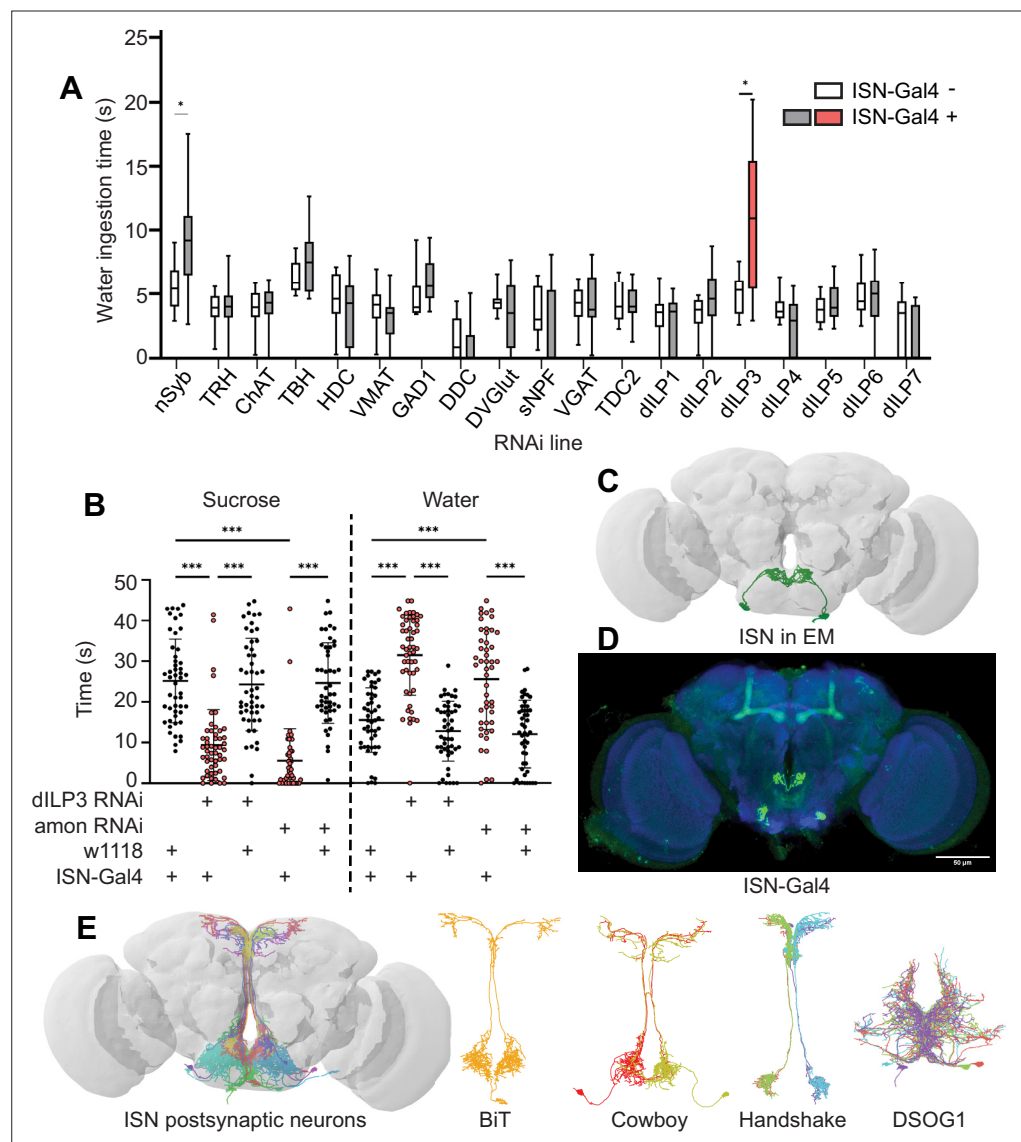

**Figure 1.** Interoceptive subesophageal zone neurons (ISNs) relay information to the pars intercerebralis. **(A)** Temporal consumption assay screen for water ingestion using RNAi targeting different neurotransmitter pathways. UAS-RNAi+ or - ISN-Gal4. RNAi against: nSynaptobrevin (nSyb), tryptophan hydroxylase (TRH), choline acetyltransferase (ChAT), tyrosine beta-hydroxylase (TBH), histamine decarboxylase (HDC), vesicular monoamine transporter (VMAT), glutamic acid decarboxylase 1 (GAD1), dopa decarboxylase (DDC), *Drosophila* vesicular glutamate transporter (DVGlut), short neuropeptide F (sNPF), vesicular GABA transporter (VGAT), tyrosine decarboxylase 2 (TDC2), *Drosophila* insulin-like peptide 1 (dILP1), *Drosophila* insulin-like peptide 2 (dILP2), *Drosophila* insulin-like peptide 3 (dILP3), *Drosophila* insulin-like peptide 4 (dILP4), *Drosophila* insulin-like peptide 5 (dILP5), *Drosophila* insulin-like peptide 6 (dILP6), *Drosophila* insulin-like peptide 7 (dILP7). Represented are the mean, and the 10–90 percentile; data was analyzed using Kruskal-Wallis test, followed by multiple comparisons against the RNAi control; p-values were adjusted using false discovery rate. n=8–39 animals/genotype except nSyb positive control (70–72). **(B)** Temporal consumption assay for 1 M sucrose or water using RNAi targeting dILP3 or amon in ISNs. Sucrose assay: Kruskal-Wallis test followed by Dunn's multiple comparison tests against ISN control and respective RNAi control. Water assay: ANOVA, Šidák's multiple comparison test to ISN control and respective RNAi control. n=48–52 animals/genotype. **(C)** ISNs reconstruction from full adult fly brain (FAFB) volume. **(D)** Light microscopy image of ISN-Gal4 registered to JFRC2010. **(E)** ISN postsynaptic neurons based on synapse predictions using FAFB volume (Zheng et al., 2018) and connectome annotation versioning engine (CAVE, Buhmann et al., 2021; Ida et al., 2012). Left: 10 postsynaptic neurons, right: postsynaptic neurons bilateral T-shaped neuron (BiT), Cowboy, Handshake, and DSOG1. \*p<0.05, \*\*\*p<0.001.

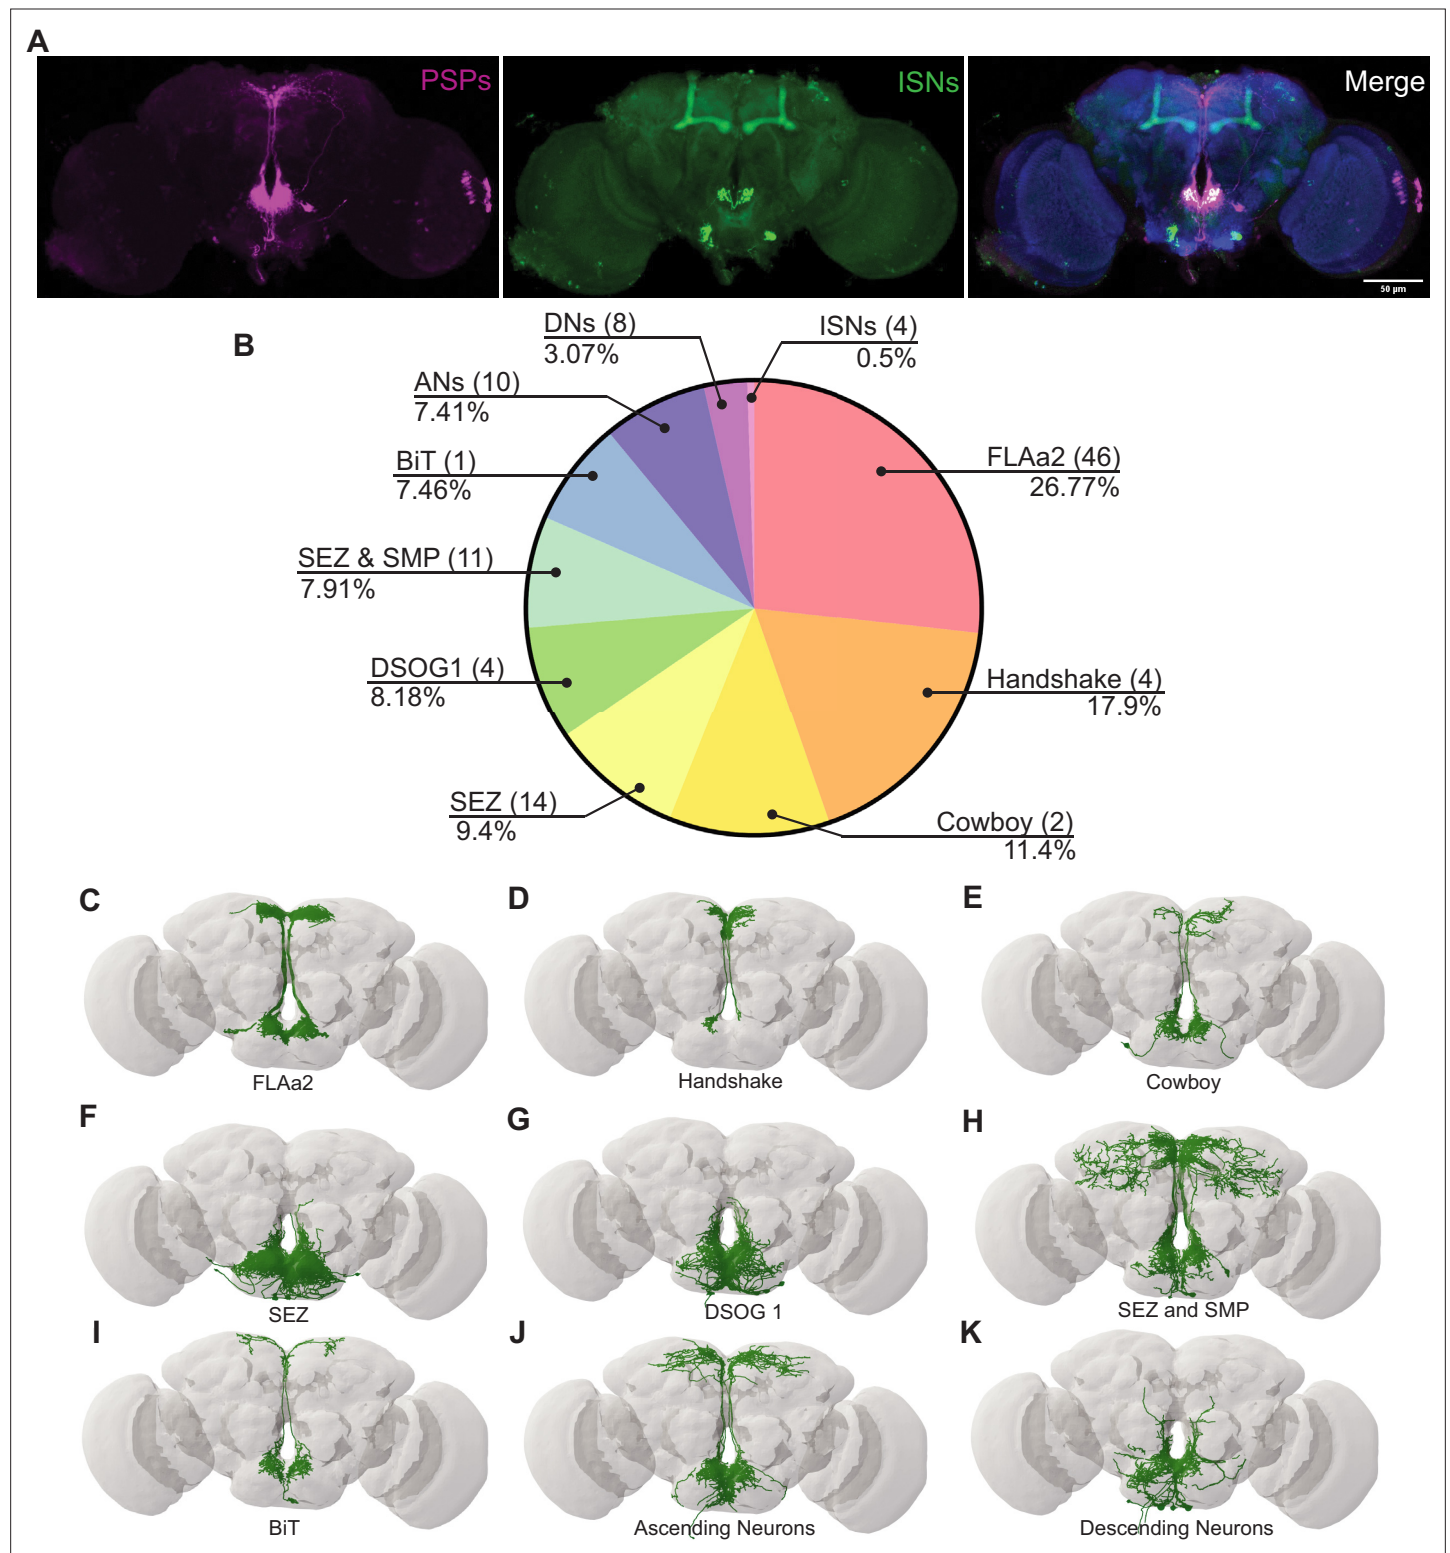

**Figure 1—figure supplement 1.** Interoceptive subesophageal zone neuron (ISN) postsynaptic partners labeled by trans-Tango and EM. **(A)** Expression of trans-Tango ligand in the ISNs (green) and postsynaptic partners (PSPs) (magenta). nc82 staining in blue. **(B)** Distribution of synaptic output from the ISNs divided by cell class or brain region. Total of 4050 synapses from the ISNs and 104 postsynaptic partners. FLAa2 (46 neurons) receive 26.77% of all ISN output, Handshake (4 neurons) 17.9%, Cowboy (2 neurons) 11.4%, neurons located in the subesophageal zone (SEZ) (14 neurons) 9.04%, DSOG1 (4 neurons) 8.18%, neurons with neurites in the subesophageal zone and superior medial protocerebrum (SEZ and SMP) (11 neurons) 7.91%, bilateral T-shaped neuron (BiT) (1 neuron) 7.46%, ascending neurons (ANs) (10 neurons) 4.41%, descending neurons (DNs) (8 neurons) 3.07%, and ISNs (4 neurons)

Figure 1—figure supplement 1 continued on next page

*Figure 1—figure supplement 1 continued*

0.5%. Only postsynaptic partners with five or more synapses were considered for this analysis. Reconstruction of FLAa2 neurons (**C**), Handshake neurons (**D**), Cowboy neurons (**E**), neurons innervating the SEZ (**F**), DSOG1 neurons (**G**), neurons innervating the SEZ and SMP (**H**), BiT (**I**), ascending neurons (**J**), descending neurons (**K**).

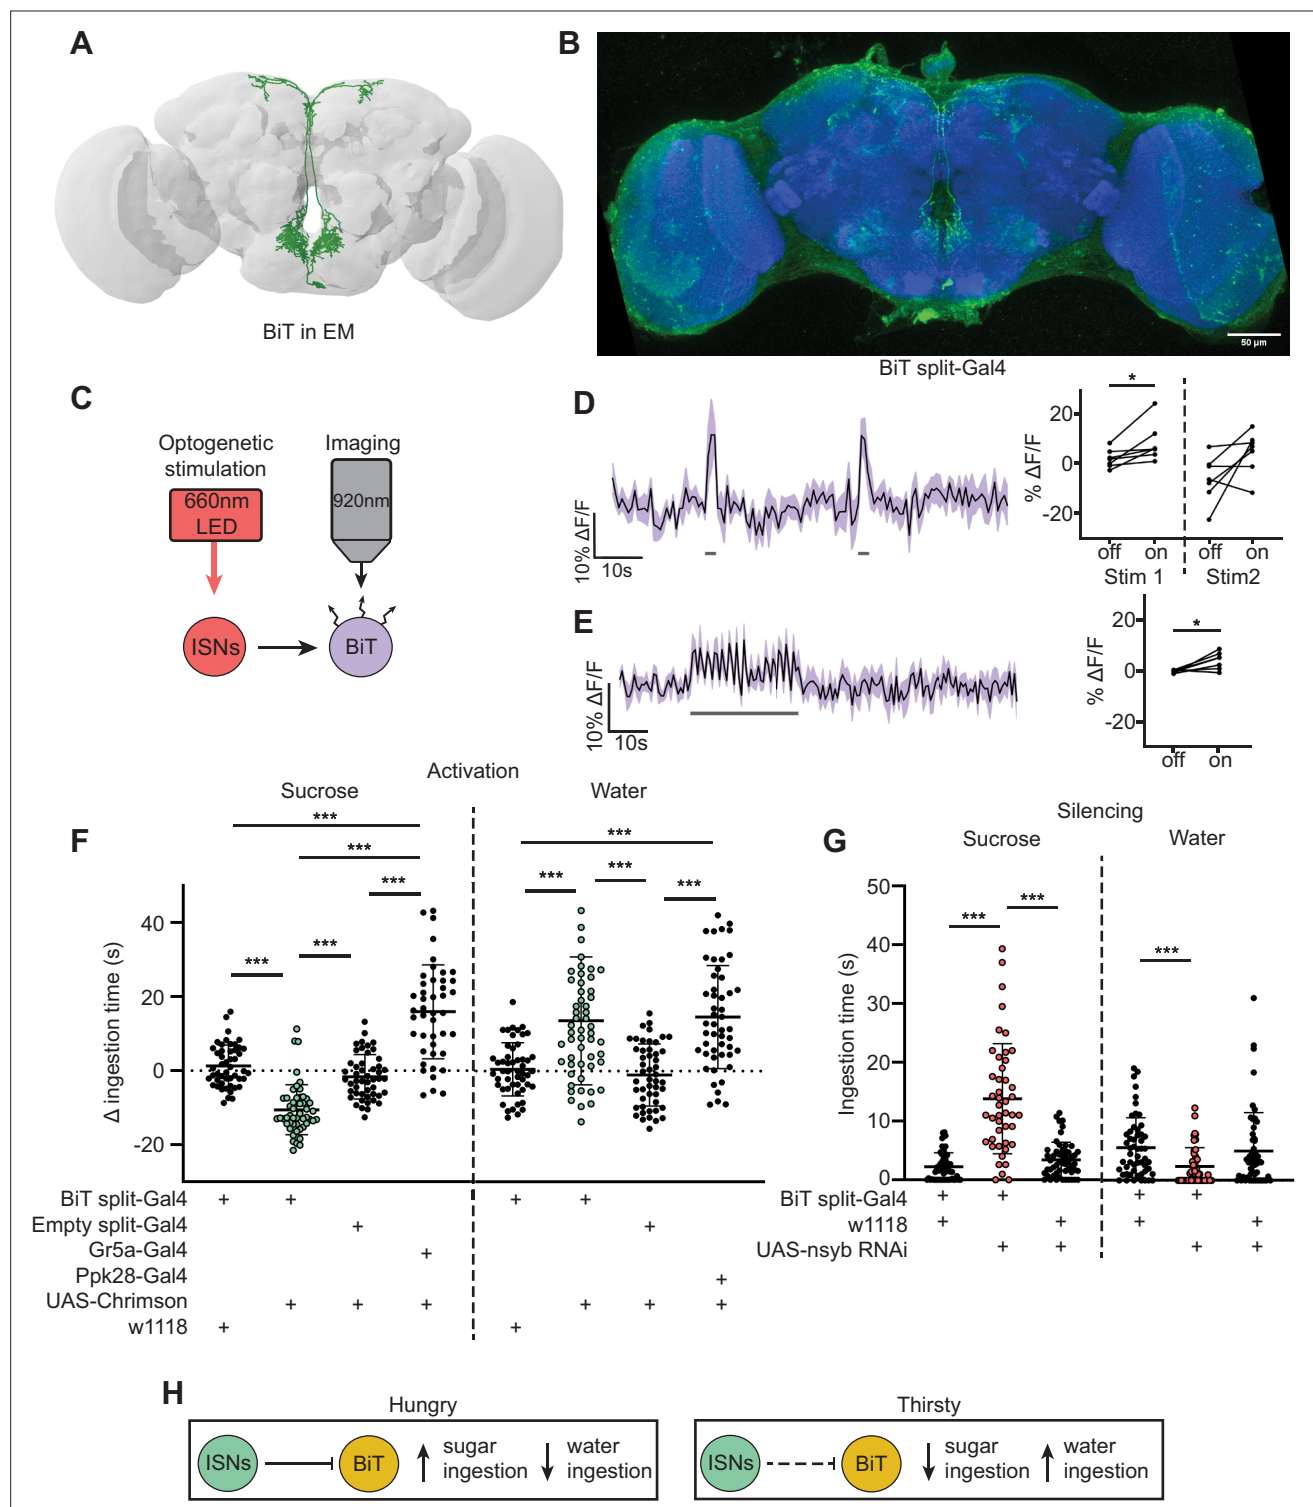

**Figure 2.** Interceptive subesophageal zone neurons (ISNs) inhibit bilateral T-shaped neuron (BiT), which oppositely regulates sugar and water ingestion. **(A)** BiT neuron reconstruction from full adult fly brain (FAFB) dataset. **(B)** Light microscopy image of BiT split-Gal4. **(C)** Experimental setup for in vivo voltage imaging. We expressed the light-sensitive ion channel Chrimson in the ISNs and optogenetically stimulated them with 660 nm LED. We expressed the voltage sensor ArcLight in BiT and imaged it with a two-photon microscope. **(D)** ArcLight response of BiT soma to 2 s optogenetic stimulation of the ISNs or **(E)** 30 s optogenetic stimulation of the ISNs. Left: Scatter plot shows mean  $\pm$  SEM of all flies imaged, gray bars represent LED stimulation. Right: Quantification of mean fluorescence intensity before stim (off) and during stim (on), each dot represents one fly. Paired Wilcoxon and paired t-test (Stim 2,  $p=0.07$ ).  $n=7$  flies. **(F)** Temporal consumption assay for 1 M sucrose or water during acute optogenetic activation of BiT with Figure 2 continued on next page

*Figure 2 continued*

Chrimson. Ingestion time of females exposed to light normalized to dark controls of indicated genotype. Sucrose: Kruskal-Wallis test with Dunn's multiple comparison test. Water: One-way ANOVA with Holm-Šidák multiple comparison test.  $n=44\text{--}54$  animals/genotype. **(G)** Temporal consumption assay for 1 M sucrose or water using RNAi targeting nSyb in BiT. Kruskal-Wallis with Dunn's multiple comparison test.  $n=45\text{--}57$  animals/genotype. **(H)** Neural model for BiT coordination of sucrose and water intake. Dashed lines indicate inactive synapses. \* $p<0.05$ , \*\*\* $p<0.001$ .

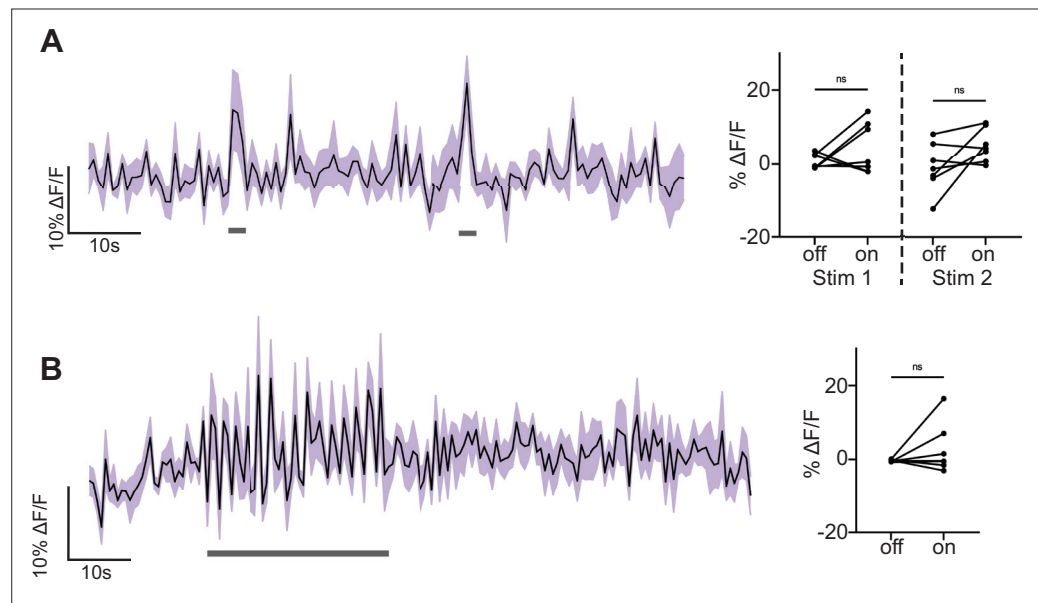

**Figure 2—figure supplement 1.** Bilateral T-shaped neuron (BiT) genetic control functional imaging. Genetic controls: we expressed the light-sensitive ion channel Chrimson without the interoceptive subesophageal zone neuron (ISN)-LexA driver and exposed the brains to 660 nm LED. We expressed the voltage sensor ArcLight in BiT and imaged it with a two-photon microscope. **(A)** ArcLight response of BiT soma to 2 s LED exposure or **(B)** 30 s LED exposure. Left: Scatter plot shows mean  $\pm$  SEM of all flies imaged, gray bars represent LED stimulation. Right: Quantification of mean fluorescence intensity before stim (off) and during stim (on), each dot represents one fly. Paired Wilcoxon or paired t-test.  $n=7$  flies.

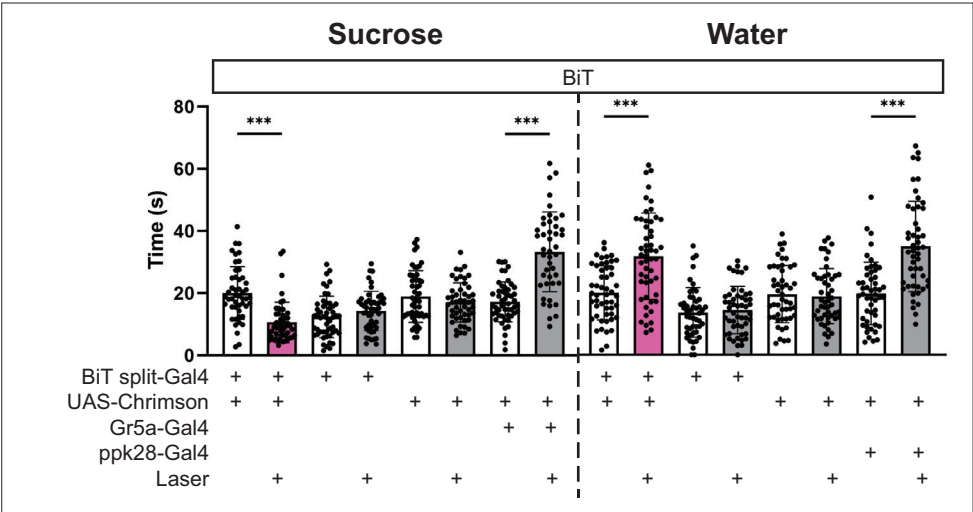

**Figure 2—figure supplement 2.** Bilateral T-shaped neuron (BiT) optogenetic activation ingestion phenotype. Temporal consumption assay for 1 M sucrose or water during acute optogenetic activation of BiT with Chrimson. Represented are the mean, and the 10–90 percentile. Data was analyzed using Kruskal-Wallis test, followed by multiple comparisons against the no laser control. n=44–54 animals/genotype. \*\*\*p<0.001.



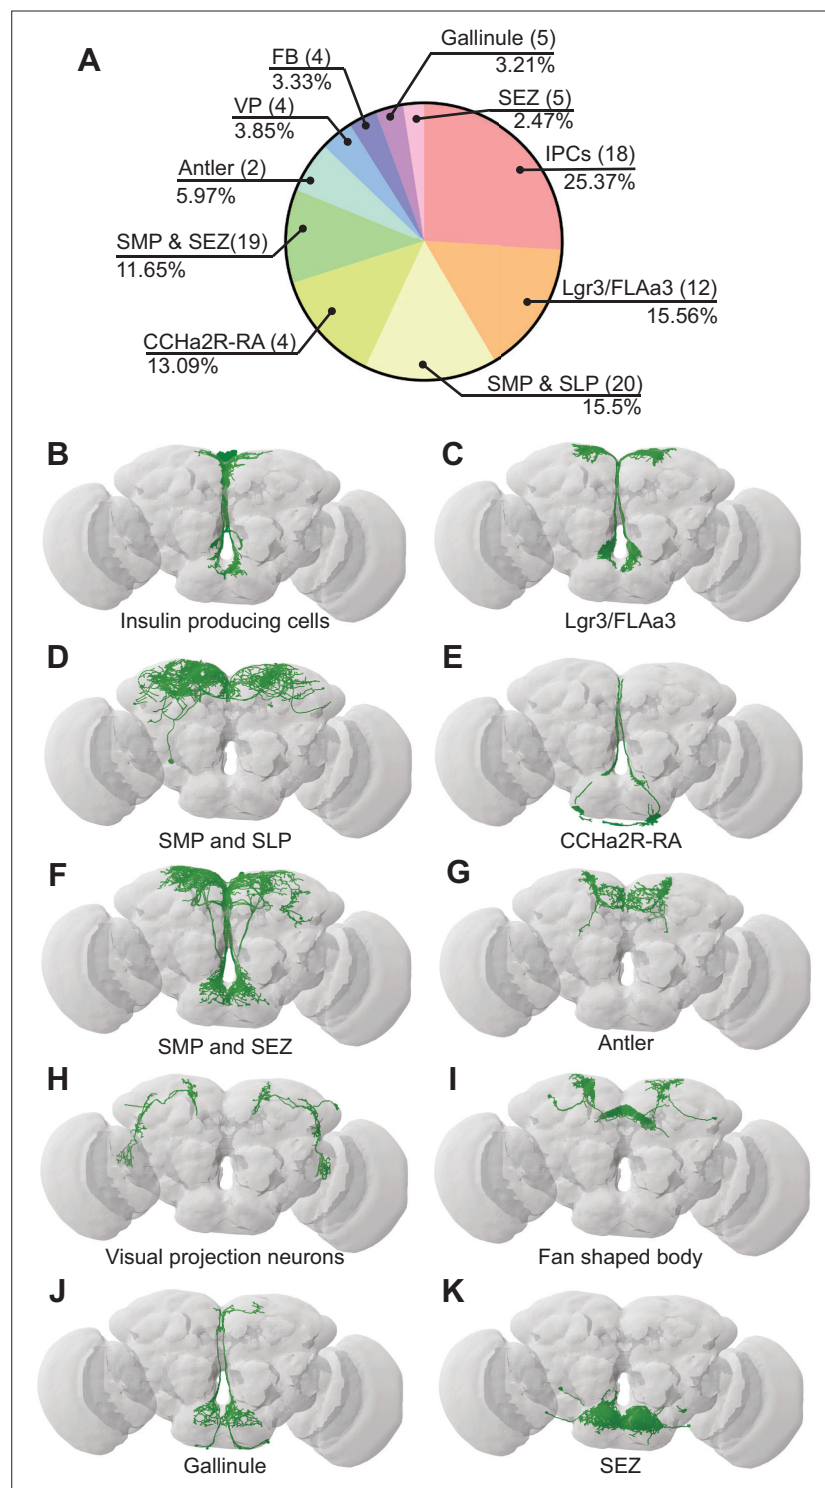

**Figure 3.** Bilateral T-shaped neuron (BiT) postsynaptic neurons include neuroendocrine cells. **(A)** Distribution of synaptic output from BiT divided by cell class or brain region. Total of 1742 synapses from BiT and 93 postsynaptic partners. Insulin producing cells (IPCs) (18 neurons) receive 25.37% of all BiT output, Lgr3/FLAa3 (12 neurons) 15.56%, superior medial protocerebrum (SMP) and superior lateral protocerebrum (SLP) (20 neurons) 15.5%, CCHamide-2 receptor isoform RA (CCHa2R-RA) (4 neurons) 13.09%, SMP and subesophageal zone (SEZ) (19 neurons) 11.65%, Antler (2 neurons) 5.97%, visual projections (4 neurons) 3.85%, fan shaped body (4 neurons) 3.33%, Gallinule (5 neurons) 3.21%, SEZ (5 neurons) 2.47%. Only postsynaptic partners with five or more synapses were considered for this analysis. Reconstruction of IPCs **(B)**, Lgr3/FLAa3 neurons **(C)**, neurons innervating the

*Figure 3 continued on next page*

*Figure 3 continued*

SMP and SLP (**D**), CCHa2R-RA neurons (**E**), neurons innervating the SMP and SEZ (**F**), Antler neurons (**G**), visual projection neurons (**H**), neurons innervating the fan shaped body (**I**), Gallinule neurons (**J**), and neurons innervating the SEZ (**K**).

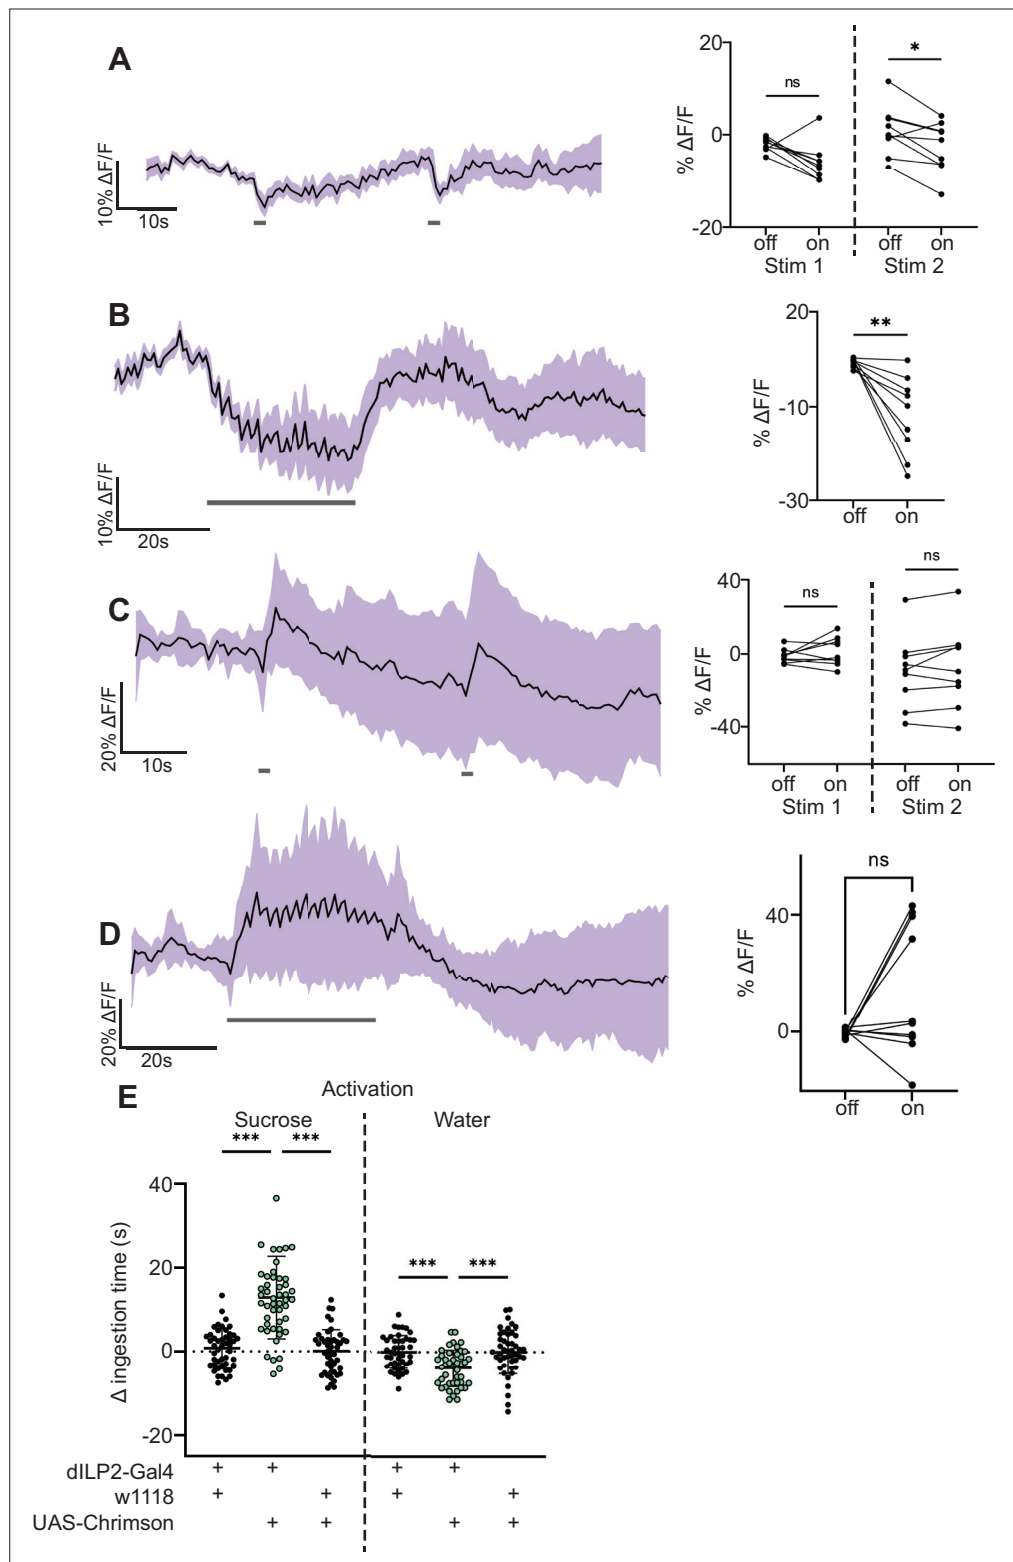

**Figure 3—figure supplement 1.** Insulin producing cell (IPC) response to bilateral T-shaped neuron (BiT) stimulation. **(A and B):** We expressed the light-sensitive ion channel Chrimson in BiT and optogenetically stimulated it with 660nm LED. We expressed the calcium sensor GCaMP in the IPCs and imaged them with a two-photon microscope. **(A)** Calcium response of IPC somas to 2 s optogenetic activation of BiT or **(B)** 30 s optogenetic activation of BiT. Left: Scatter plot shows mean  $\pm$  SEM of all flies imaged, gray bars represent LED stimulation.

*Figure 3—figure supplement 1 continued*

Right: Quantification of mean fluorescence intensity before stim (off) and during stim (on), each dot represents one fly. Paired Wilcoxon test or paired t-test.  $n=9$  flies. (C and D) Genetic controls: we expressed the light-sensitive ion channel Chrimson without the BiT-split Gal4 driver and exposed the brains to 660 nm LED. We expressed the calcium sensor GCaMP in the IPCs and imaged them with a two-photon microscope. (C) Calcium response of IPC somas to 2 s LED exposure or (D) 30 s LED exposure. Left: Scatter plot shows mean  $\pm$  SEM of all flies imaged, gray bars represent LED stimulation. Right: Quantification of mean fluorescence intensity before stim (off) and during stim (on), each dot represents one fly. Paired t-test.  $n=9$ –10 flies. (E) Temporal consumption assay for 1 M sucrose or water during acute optogenetic activation of IPCs with Chrimson. Ingestion time of females exposed to light normalized to dark controls of indicated genotype. One-way ANOVA with Holm-Šidák multiple comparison test.  $n=43$ –49 animals/genotype. \* $p<0.05$ , \*\* $p<0.01$ , \*\*\* $p<0.001$ .

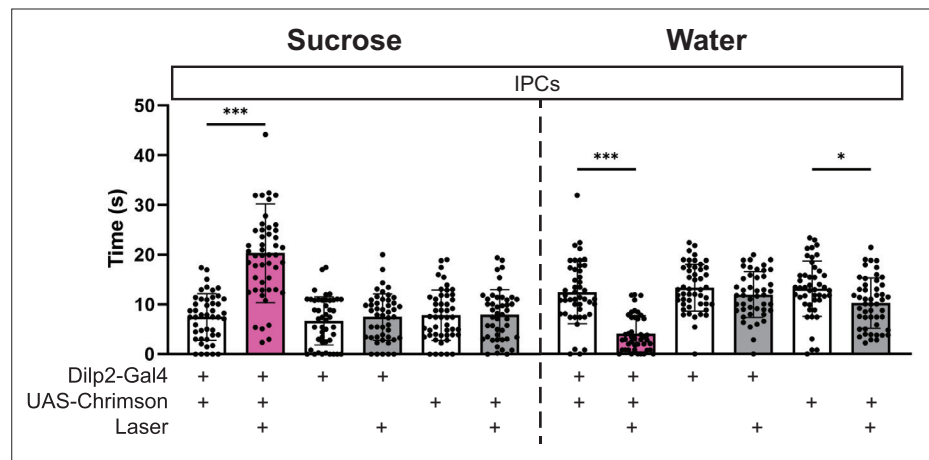

**Figure 3—figure supplement 2.** Insulin producing cell (IPC) optogenetic activation ingestion phenotype. Temporal consumption assay for 1 M sucrose or water during acute optogenetic activation of IPCs with Chrimson. Represented are the mean, and the 10–90 percentile. Data was analyzed using one-way ANOVA, followed by multiple comparisons against the no laser control.  $n=43\text{--}49$  animals/genotype. \* $p<0.05$ , \*\*\* $p<0.001$ .

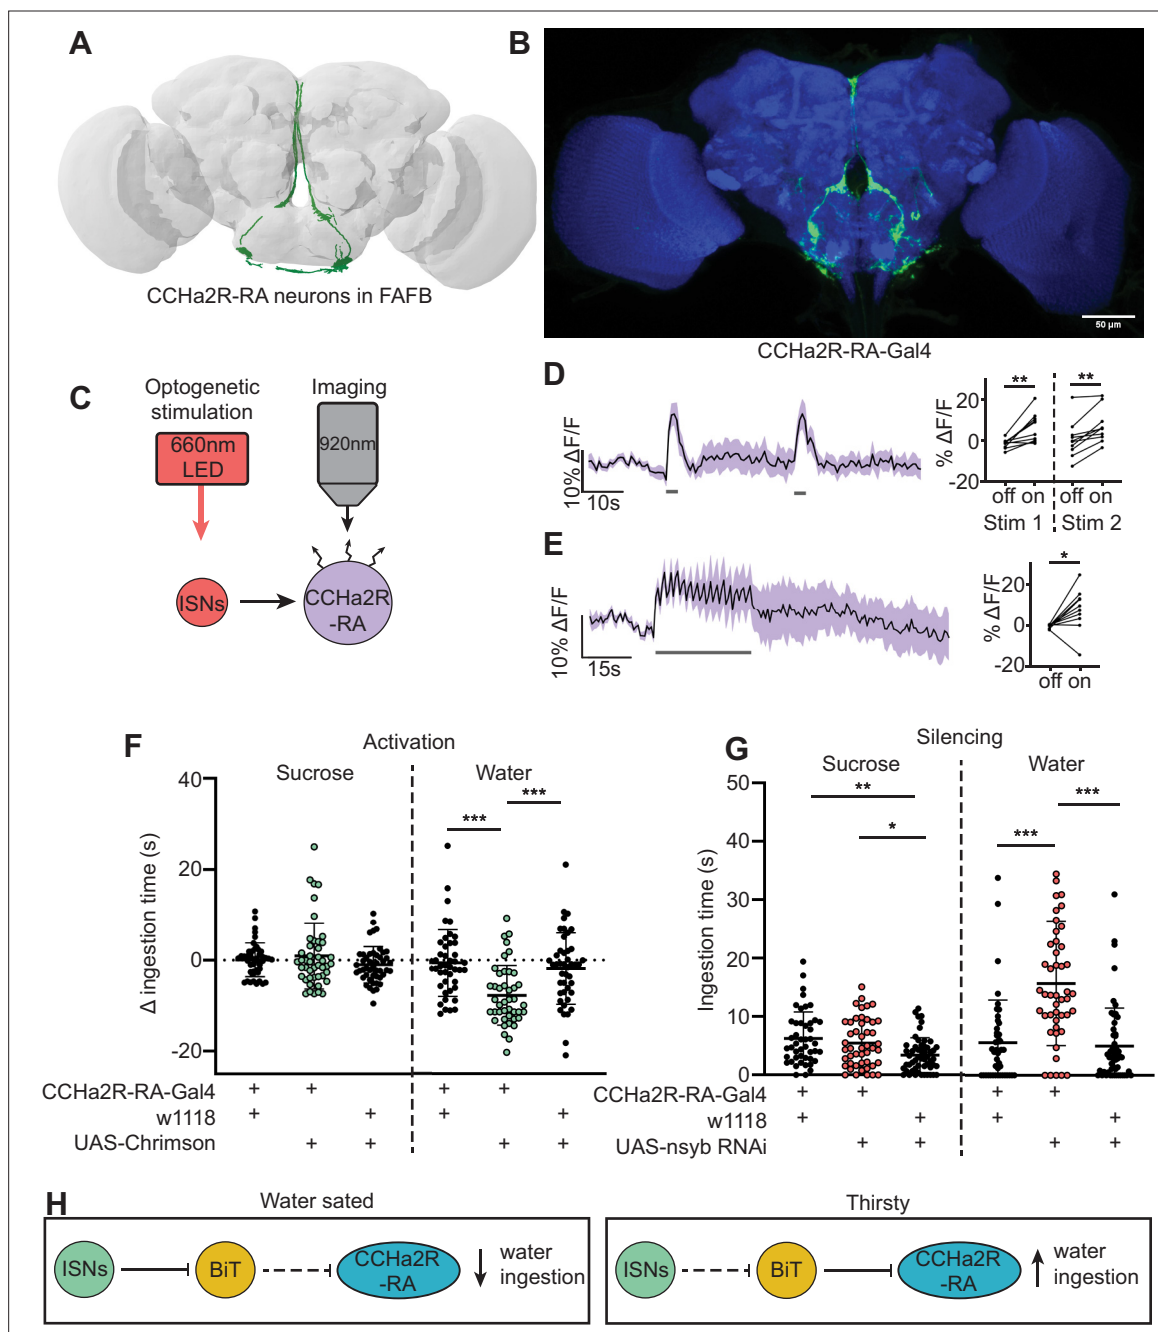

**Figure 4.** CCHamide-2 receptor isoform RA (CCHa2R-RA) neurons regulate water but not sugar ingestion and are likely inhibited by bilateral T-shaped neuron (BiT). **(A)** CCHa2R-RA neurons reconstruction from full adult fly brain (FAFB) dataset. **(B)** Light microscopy image of CCHa2R-RA-Gal4. **(C)** Experimental setup for in vivo calcium imaging. We expressed the light-sensitive ion channel Chrimson in the interoceptive subesophageal zone neurons (ISNs) and optogenetically stimulated them with 660 nm LED. We expressed the calcium sensor GCaMP in the CCHa2R-RA neurons and imaged them with a two-photon microscope. **(D)** Calcium responses of CCHa2R-RA neurites in subesophageal zone (SEZ) to 2 s optogenetic stimulation of the ISNs or **(E)** 30 s optogenetic stimulation of the ISNs. Left: Scatter plot shows mean  $\pm$  SEM of all flies imaged, gray bars represent LED stimulation. Right: Quantification of mean fluorescence intensity before stim (off) and during stim (on), each dot represents one fly. Paired t-test and paired Wilcoxon test.  $n=10$  flies. **(F)** Temporal consumption assay for 1 M sucrose or water during acute optogenetic activation of CCHa2R-RA neurons with Chrimson. Ingestion time of females exposed to light normalized to dark controls of indicated genotype. Sucrose: Kruskal-Wallis with Dunn's multiple comparison test. Water: One-way ANOVA with Holm-Šidák multiple comparison test.  $n=42-47$  animals/genotype. **(G)** Temporal consumption assay for 1 M sucrose or water using RNAi targeting nSynaptobrevin (nSyb) in CCHa2R-RA neurons. Kruskal-Wallis with Dunn's multiple comparison test.  $n=45-54$  animals/genotype. **(H)** Neural model for CCHa2R-RA regulation of water intake. Dashed lines indicate inactive synapses.  $*p<0.05$ ,  $**p<0.01$ ,  $***p<0.001$ .

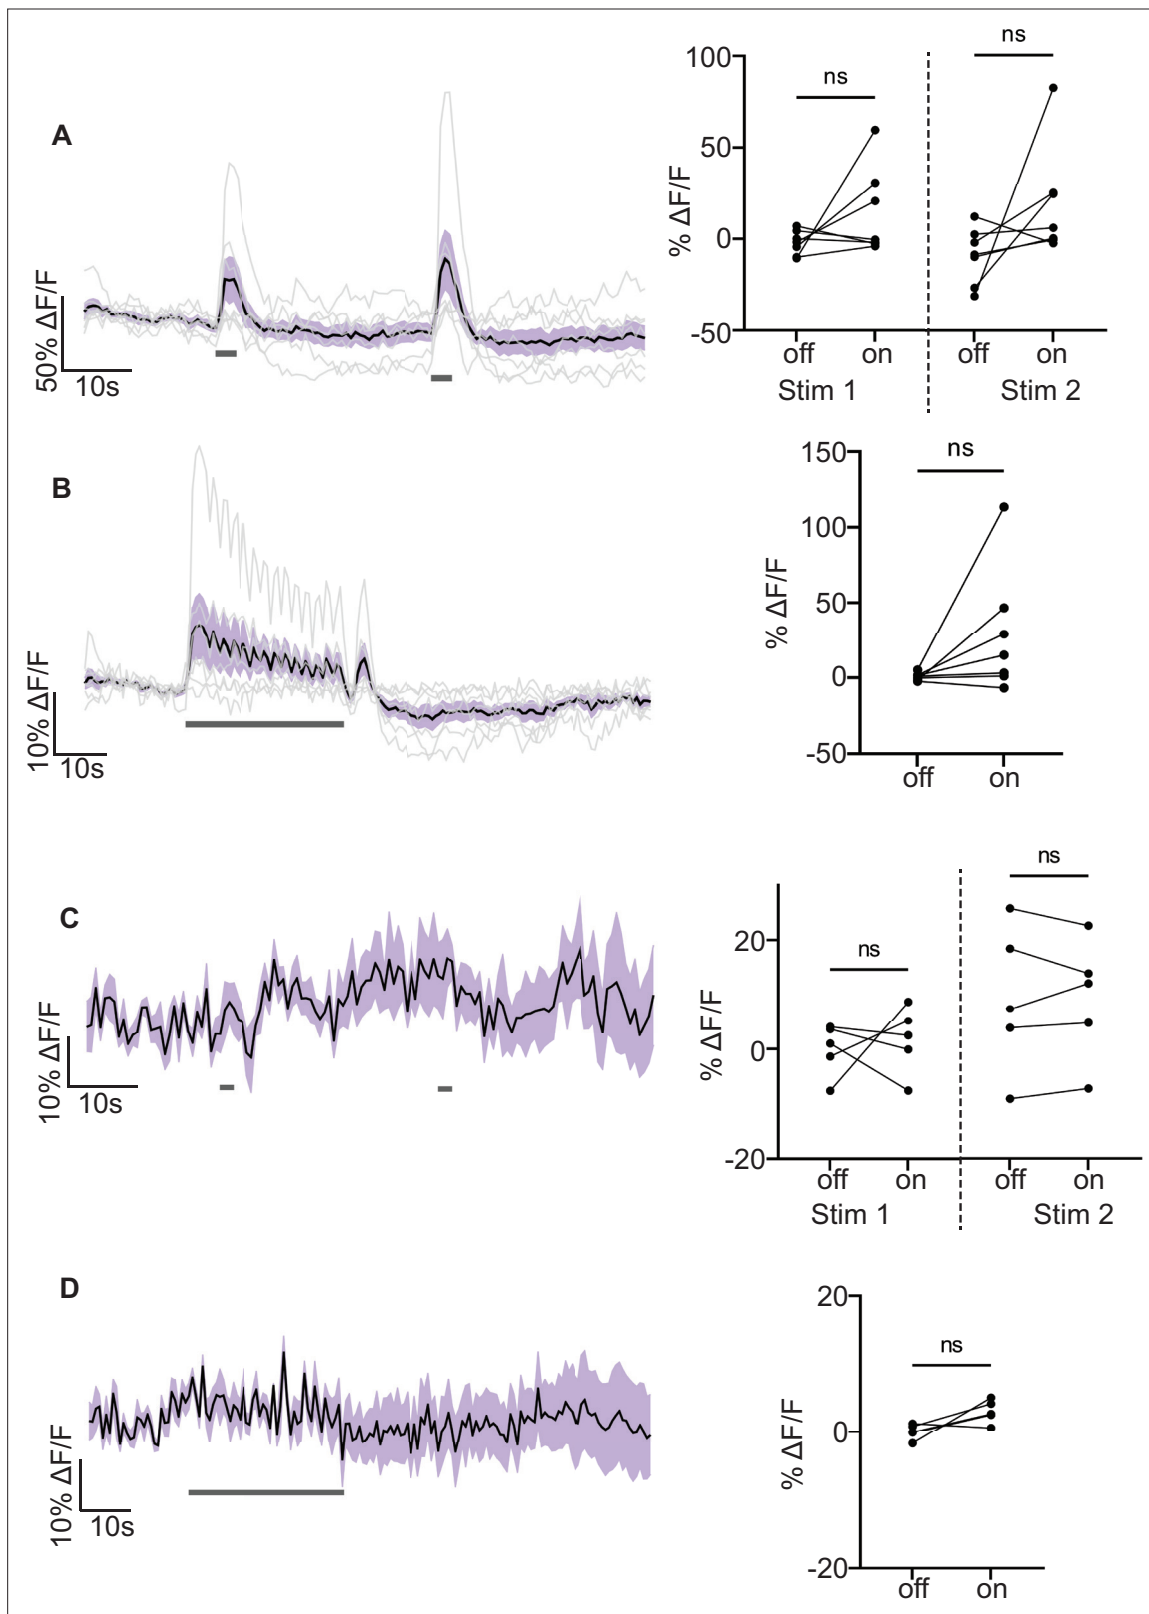

**Figure 4—figure supplement 1.** CCHamide-2 receptor isoform RA (CCHa2R-RA) genetic controls functional imaging and response to bilateral T-shaped neuron (BiT) optogenetic stimulation. **(A and B):** Genetic controls: we expressed the light-sensitive ion channel Chrimson without the interoceptive subesophageal zone neuron (ISN)-LexA driver and exposed the brains to 660nm LED. We expressed the calcium sensor GCaMP in the CCHa2R-RA neurons and imaged them with a two-photon microscope. **(A)** Calcium response of CCHa2R-RA subesophageal zone (SEZ) neurites to 2 s

Figure 4—figure supplement 1 continued on next page

*Figure 4—figure supplement 1 continued*

LED exposure or **(B)** 30 s LED exposure. Left: Scatter plot shows mean  $\pm$  SEM of all flies imaged, with individual traces in gray, gray bars represent LED stimulation. Right: Quantification of mean fluorescence intensity before stim (off) and during stim (on), each dot represents one fly. Paired Wilcoxon test and paired t-test.  $n=7$  flies. (C and D) We expressed the light-sensitive ion channel Chrimson in BiT and optogenetically stimulated it with 660 nm LED. We expressed the calcium sensor GCaMP in the CCHa2R-RA neurons and imaged them with a two-photon microscope. **(C)** Calcium response of CCHa2R-RA somas to 2 s optogenetic stimulation of BiT or **(D)** 30 s optogenetic stimulation of BiT. Left: Scatter plot shows mean  $\pm$  SEM of all flies imaged, gray bars represent LED stimulation. Right: Quantification of mean fluorescence intensity before stim (off) and during stim (on), each dot represents one fly. Paired t-test.  $n=5$  flies.



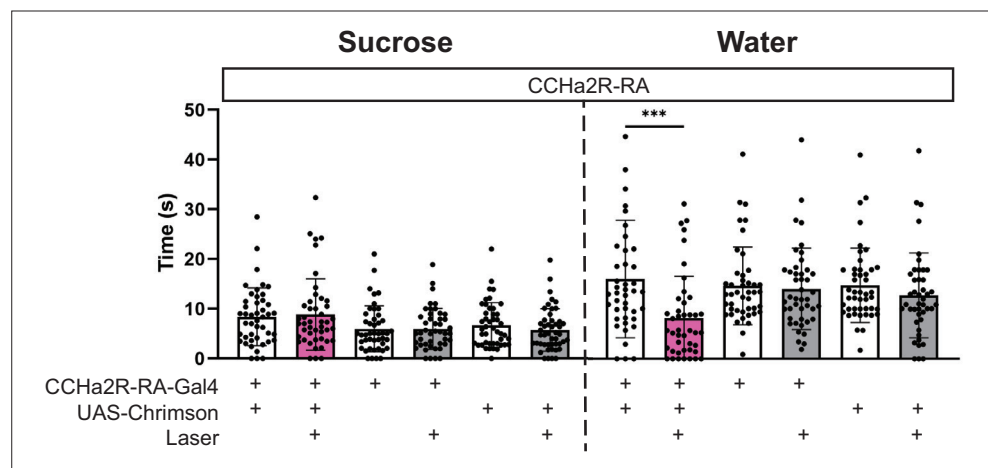

**Figure 4—figure supplement 2.** CCHamide-2 receptor isoform RA (CCHa2R-RA) optogenetic activation ingestion phenotype. Temporal consumption assay for 1 M sucrose or water during acute optogenetic activation of CCHa2R-RA neurons with Chrimson. Represented are the mean, and the 10–90 percentile. Data was analyzed using Kruskal-Wallis test, followed by multiple comparisons against the no laser control.  $n=42\text{--}47$  animals/genotype. \*\*\* $p<0.001$ .

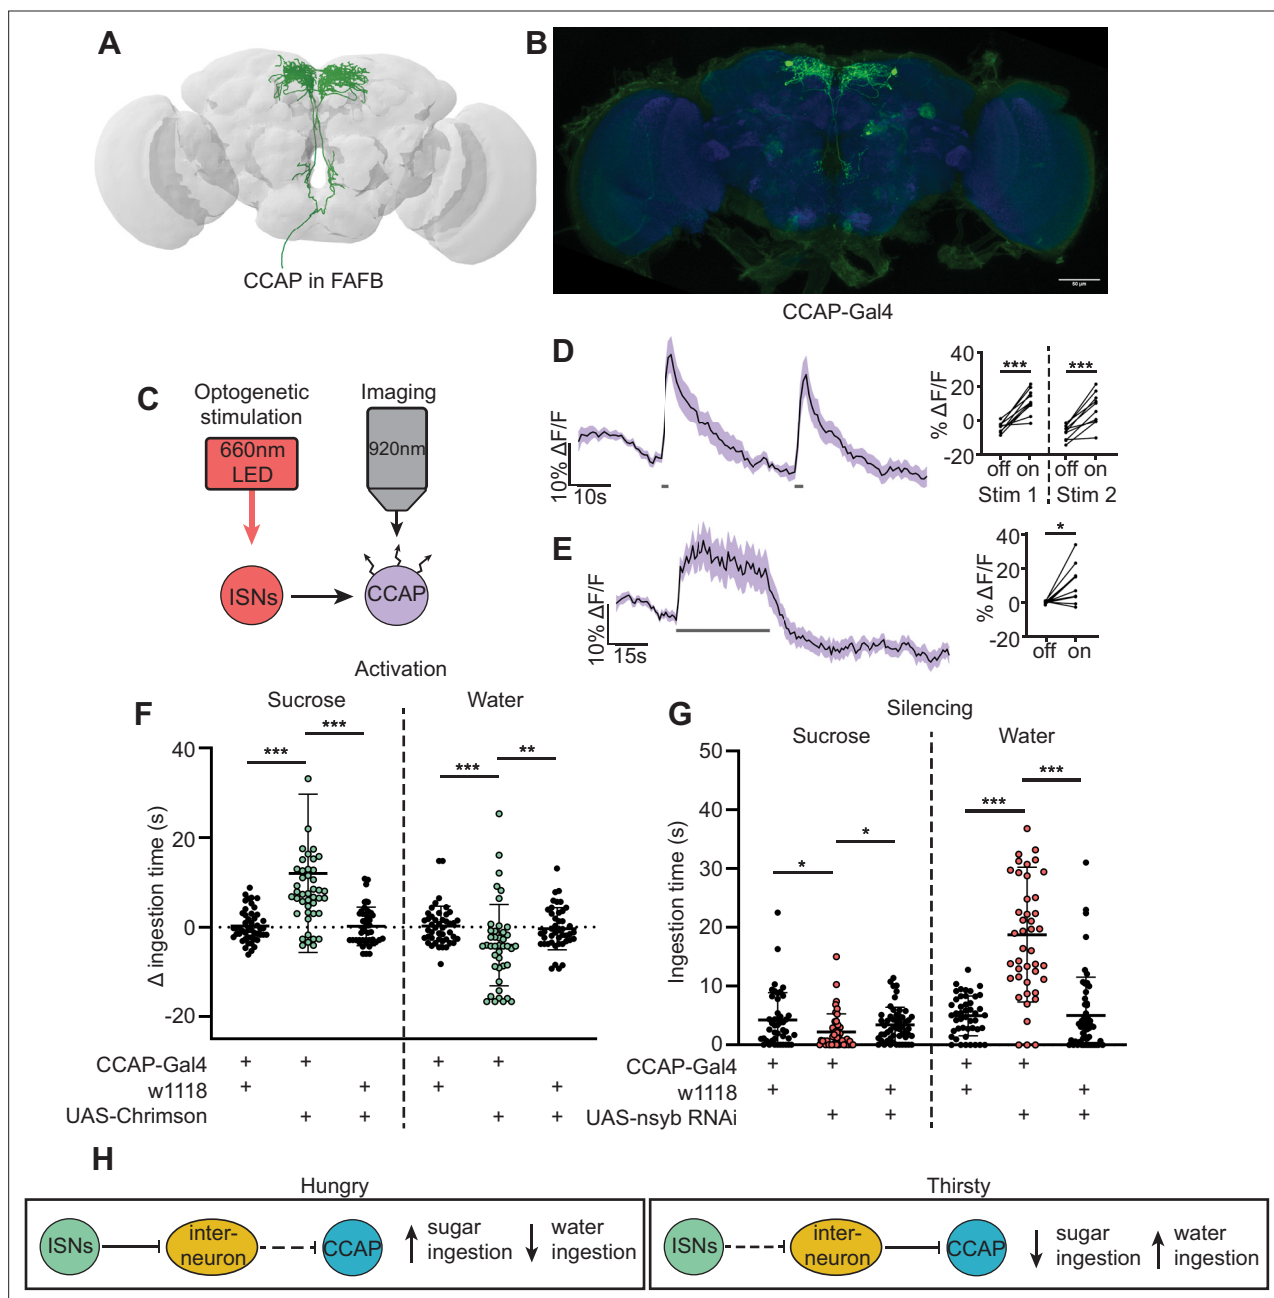

**Figure 5.** Crustacean cardioactive peptide (CCAP) neurons are downstream of the interoceptive subesophageal zone neurons (ISNs) and oppositely regulate sugar and water ingestion. **(A)** CCAP neurons reconstruction from full adult fly brain (FAFB) dataset. **(B)** Light microscopy image of CCAP-Gal4. **(C)** Experimental setup for in vivo calcium imaging. We expressed the light-sensitive ion channel Chrimson in the ISNs and optogenetically stimulated them with 660 nm LED. We expressed the calcium sensor GCaMP in the CCAP neurons and imaged them with a two-photon microscope. **(D)** Calcium response of CCAP neurites to 2 s optogenetic stimulation of the ISNs or **(E)** 30 s optogenetic stimulation of the ISNs. Left: Scatter plot shows mean  $\pm$  SEM of all flies imaged, gray bars represent LED stimulation. Right: Quantification of mean fluorescence intensity before stim (off) and during stim (on), each dot represents one fly. Paired t-test.  $n=10$  flies. **(F)** Temporal consumption assay for 1 M sucrose or water during acute optogenetic activation of CCAP neurons with Chrimson. Ingestion time of females exposed to light normalized to dark controls of indicated genotype. Sucrose: Kruskal-Wallis with Dunn's multiple comparison test, Water: One-way ANOVA with Holm-Šidák multiple comparison test.  $n=42-48$  animals/genotype. **(G)** Temporal consumption assay for 1 M sucrose or water using RNAi targeting nSynaptobrevin (nSyb) in CCAP neurons. Kruskal-Wallis with Dunn's multiple comparison test.  $n=45-54$  animals/genotype. **(H)** Neural model for CCAP coordination of sugar and water intake. Dashed lines indicate inactive synapses. \* $p<0.05$ , \*\* $p<0.01$ , \*\*\* $p<0.001$ .

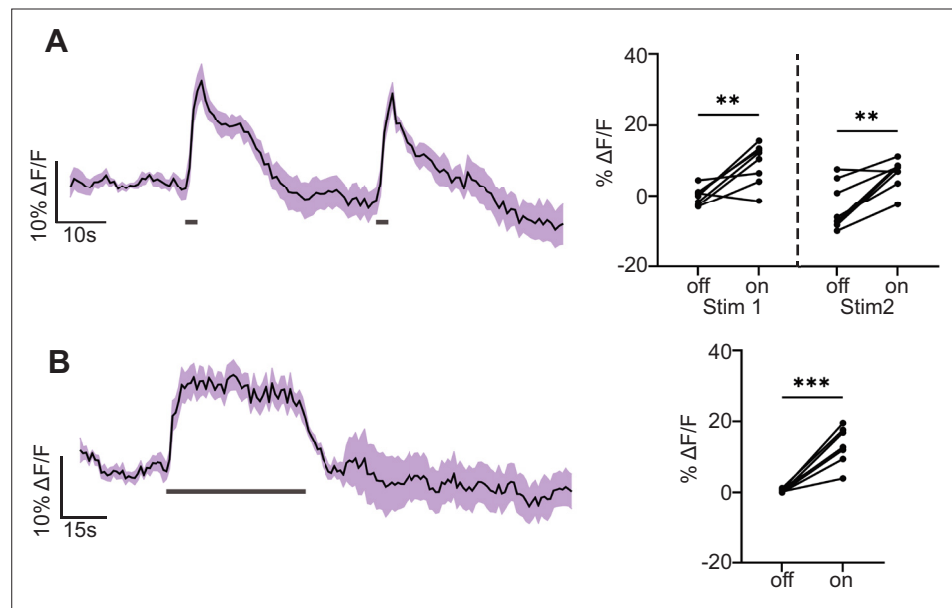

**Figure 5—figure supplement 1.** Crustacean cardioactive peptide (CCAP) responds to interoceptive subesophageal zone neuron (ISN) activation using another CCAP-Gal4 driver. We expressed the light-sensitive ion channel Chrimson in the ISNs and optogenetically stimulated them with 660 nm LED. We expressed the calcium sensor GCaMP in the CCAP neurons and imaged them with a two-photon microscope. **(A)** Calcium response of CCAP neurites to 2 s optogenetic stimulation of the ISNs or **(B)** 30 s optogenetic stimulation of the ISNs. Left: Scatter plot shows mean  $\pm$  SEM of all flies imaged, gray bars represent LED stimulation. Right: Quantification of mean fluorescence intensity before stim (off) and during stim (on), each dot represents one fly. Paired t-test.  $n=8$  flies.  $**p<0.01$ ,  $***p<0.001$ .

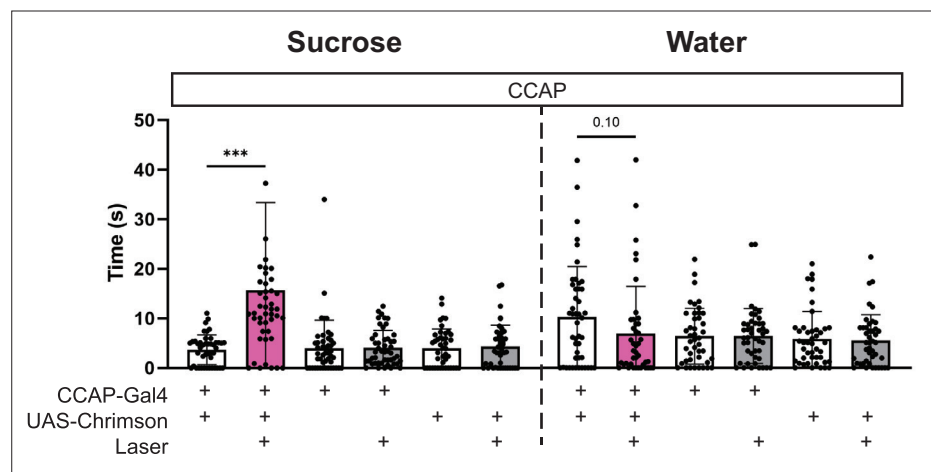

**Figure 5—figure supplement 2.** Crustacean cardioactive peptide (CCAP) optogenetic activation ingestion phenotype. Temporal consumption assay for 1 M sucrose or water during acute optogenetic activation of CCAP neurons with Chrimson. Represented are the mean, and the 10–90 percentile. Data was analyzed using Kruskal-Wallis test, followed by multiple comparisons against the no laser control. n=42–48 animals/genotype. \*\*\*p<0.001.

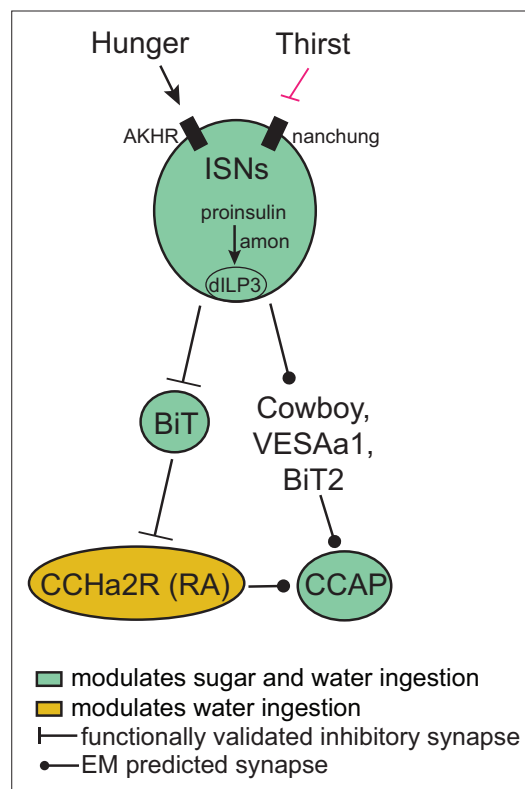

**Figure 6.** Interoceptive subesophageal zone neurons (ISN) regulation of sugar and water ingestion model. Hunger signals activate the ISN while thirst signals inhibit the ISNs. ISNs use *Drosophila* insulin-like peptide 3 (dILP3) as a neurotransmitter and require amontillado (amon) for neuropeptide processing. ISN activity inhibits bilateral T-shaped neuron (BiT), which in turn inhibits CCHamide-2 receptor isoform RA (CCHA2R-RA) neurons. Crustacean cardioactive peptide (CCAP) neurons are downstream of the ISNs, connected via Cowboy, VESAA1, BiT2, and CCHA2R-RA neurons. BiT activity inhibits sugar ingestion and promotes water ingestion. CCAP activity promotes sugar ingestion and inhibits water ingestion. CCHA2R-RA activity inhibits water ingestion.
